# Supplementary material for: A novel synthesis of dihydrofuranyl alcohols through cascade reactions of 1,3-diketones with α,β-unsaturated epoxides
Source: Royal Society of Chemistry journal article supplement (doi:10.1039/d3qo01309j), 2023-01-01
Supplement: d3qo01309j1.pdf [file d3qo01309j1.pdf]

# **A Novel Method for the Synthesis of Dihydrofuranyl Alcohols through cascade reactions of 1,3-Diketones and $\alpha$ , $\beta$ - Unsaturated Epoxides**

Chengyu Yu<sup>a</sup>, Guoren Yue<sup>a,b\*</sup>, Penji Yan<sup>b</sup>, Hai Song<sup>b</sup>, Hucheng Shi<sup>a</sup>, Yangfei Wei<sup>b</sup>, Zhengeng Song<sup>b</sup> and Xin Jia<sup>a</sup>

<sup>a</sup>School of Chemistry and Chemical Engineering, State Key Laboratory Incubation Base for Green Processing of Chemical Engineering, Shihezi University, Shihezi 832003, China.

<sup>b</sup>Key Laboratory of Hexi Corridor Resources Utilization of Gansu Province, College of Chemistry and Chemical Engineering, Hexi University, Zhangye, Gansu 734000, PR China;

## Table of Contents

|                                                                                                                          |    |
|--------------------------------------------------------------------------------------------------------------------------|----|
| 1.Data for Nucleophilic Reagents .....                                                                                   | 3  |
| 2.General Procedure for Synthesis of raw material .....                                                                  | 3  |
| 3.General procedure for the reaction of $\alpha,\beta$ -unsaturated epoxides with $\beta$ -dicarbonyl compounds<br>..... | 4  |
| 4.Preparation method of 7 .....                                                                                          | 13 |
| 5.General procedure for the 8 derivatization reaction .....                                                              | 15 |
| 6.X-Ray crystallography data .....                                                                                       | 17 |
| 7. $^1\text{H}$ and $^{13}\text{C}$ NMR Spectrogram .....                                                                | 20 |
| 8.Infrared Spectroscopy for cis-6ad.....                                                                                 | 59 |
| 9.Density Functional Theory (DFT) calculations results.....                                                              | 60 |
| 10.DFT-calculated Cartesian Coordinates.....                                                                             | 63 |

## 1.Data for Nucleophilic Reagents

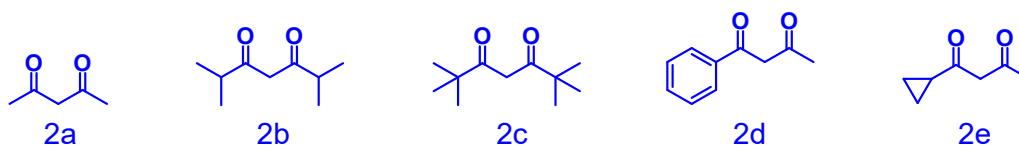

All nucleophilic reagents, other chemicals and solvents were purchased from commercial company and used as received.

## 2.General Procedure for Synthesis of raw material

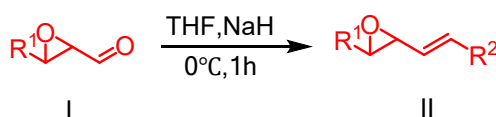

Dry THF and NaH ( 0.5625 M, 1.2 equiv.) were added to a three-neck flask at 0 ° C, and phosphorus Yelide reagent (0.45 M, 1.2 equiv.) was dropped-added to the three-neck flask. The reaction was stirred for 5min and then the corresponding epoxy aldehyde **I** (0.375 M, 1 equiv.) was added. The mixture was stirred at 0 ° C for 1 hours. Then the reaction was quenched with water, extraction with EtOAc, washed with brine, drying over Na<sub>2</sub>SO<sub>4</sub>, evaporation, and purification by flash column chromatography provided α,β-unsaturated epoxides **II** as a clear, colorless oil. Compound **I** was obtained from trans cinnamaldehyde, so compound **II** was trans α, β-Unsaturated Epoxides.

### Ethyl (E)-3-(3-phenyloxiran-2-yl)acrylate

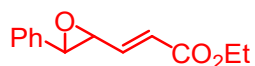

**(1a)**: Colorless oil. R<sub>f</sub>=0.25 ( petroleum ether/EtOAc = 30:1 )

<sup>1</sup>H NMR (400 MHz, Chloroform-d) δ 7.38 – 7.33 (m, 3H), 7.29 (dd, J = 7.7, 1.9 Hz, 2H), 6.82 (dd, J = 15.7, 6.9 Hz, 1H), 6.20 (dd, J = 15.7, 0.8 Hz, 1H), 4.23 (q, J = 7.1 Hz, 2H), 3.84 (d, J = 1.8 Hz, 1H), 3.48 (ddd, J = 7.0, 1.8, 0.8 Hz, 1H), 1.31 (t, J = 7.1 Hz, 3H).<sup>13</sup>C NMR (101 MHz, Chloroform-d) δ 165.56, 143.59, 136.13, 128.63, 125.53, 124.06, 61.01, 60.64, 60.54, 14.22. HRMS calcd for C<sub>13</sub>H<sub>14</sub>O<sub>3</sub> [M + Na]<sup>+</sup>: 241.0835, found: 241.0854.

### Methyl (E)-3-(3-phenyloxiran-2-yl)acrylate

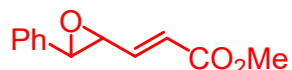

**(1b)**: Colorless oil. R<sub>f</sub>=0.25 ( petroleum ether/EtOAc = 30:1 )

<sup>1</sup>H NMR (400 MHz, Chloroform-d) δ 7.39 – 7.33 (m, 3H), 7.29 (dd, J = 7.8, 1.8 Hz, 2H), 6.84 (dd, J = 15.7, 6.8 Hz, 1H), 6.21 (dd, J = 15.7, 0.8 Hz, 1H), 3.83 (d, J = 1.9 Hz, 1H), 3.77 (s, 3H), 3.48 (ddd, J = 6.9, 1.8, 0.8 Hz, 1H).<sup>13</sup>C NMR (101 MHz, Chloroform-d) δ 166.00, 143.91, 136.10, 128.64, 125.55, 123.57, 61.05, 60.49, 51.74. HRMS calcd for C<sub>12</sub>H<sub>12</sub>O<sub>3</sub> [M + Na]<sup>+</sup>: 227.0679, found: 227.0694.

### (E)-3-(3-phenyloxiran-2-yl)acrylonitrile

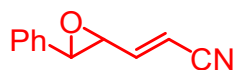

(1c): Colorless oil.  $R_f=0.2$  (petroleum ether/EtOAc = 30:1)

$^1\text{H}$  NMR (400 MHz, Chloroform-d)  $\delta$  7.40 (ddd,  $J = 5.3, 4.3, 2.4$  Hz, 3H), 7.34 – 7.29 (m, 2H), 6.72 (dd,  $J = 16.2, 5.6$  Hz, 1H), 5.74 (dd,  $J = 16.2, 1.0$  Hz, 1H), 3.82 (d,  $J = 1.9$  Hz, 1H), 3.50 (ddd,  $J = 5.7, 1.9, 0.9$  Hz, 1H).  $^{13}\text{C}$  NMR (101 MHz, Chloroform-d)  $\delta$  149.67, 135.30, 129.01, 128.77, 125.56, 116.52, 101.91, 61.77, 60.08. HRMS calcd for  $\text{C}_{11}\text{H}_9\text{NO}$   $[\text{M} + \text{Na}]^+$ : 194.0576, found: 194.0592.

### Ethyl (E)-3-(3-methyloxiran-2-yl)acrylate

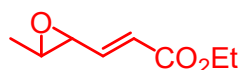

(1d): Colorless oil.  $R_f=0.25$  (petroleum ether/EtOAc = 30:1)

$^1\text{H}$  NMR (400 MHz, Chloroform-d)  $\delta$  6.65 (ddd,  $J = 15.6, 7.1, 1.2$  Hz, 1H), 6.10 (dd,  $J = 15.7, 0.9$  Hz, 1H), 4.21 – 4.15 (m, 2H), 3.16 (dt,  $J = 7.2, 1.4$  Hz, 1H), 2.95 (qt,  $J = 5.2, 1.5$  Hz, 1H), 1.37 (dd,  $J = 5.2, 1.4$  Hz, 3H), 1.28 – 1.25 (m, 3H).  $^{13}\text{C}$  NMR (101 MHz, Chloroform-d)  $\delta$  165.59, 144.58, 123.64, 60.49, 57.31, 57.15, 17.46, 14.15. HRMS calcd for  $\text{C}_8\text{H}_{12}\text{O}_3$   $[\text{M} + \text{Na}]^+$ : 179.0679, found: 179.0700.

### Methyl (E)-3-(3-methyloxiran-2-yl)acrylate

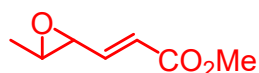

(1e): Colorless oil.  $R_f=0.25$  (petroleum ether/EtOAc = 30:1)

$^1\text{H}$  NMR (400 MHz, Chloroform-d)  $\delta$  6.69 (dd,  $J = 15.7, 7.0$  Hz, 1H), 6.13 (dd,  $J = 15.7, 0.9$  Hz, 1H), 3.74 (d,  $J = 0.8$  Hz, 3H), 3.18 (dd,  $J = 7.1, 1.9$  Hz, 1H), 2.97 (tdd,  $J = 5.2, 4.3, 2.1$  Hz, 1H), 1.39 (d,  $J = 5.2$  Hz, 3H).  $^{13}\text{C}$  NMR (101 MHz, Chloroform-d)  $\delta$  166.08, 144.92, 123.14, 57.39, 57.14, 51.65, 17.47. HRMS calcd for  $\text{C}_7\text{H}_{10}\text{O}_3$   $[\text{M} + \text{Na}]^+$ : 165.0522, found: 165.0543.

## 3. General procedure for the reaction of $\alpha,\beta$ -unsaturated epoxides with $\beta$ -dicarbonyl

### compounds

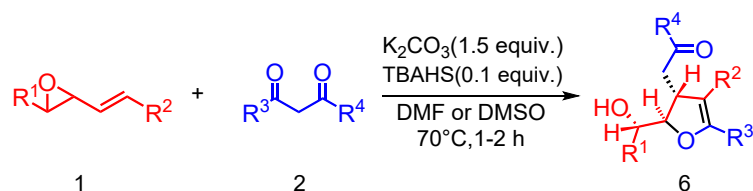

**1** (0.458mmol, 1 equiv.), **2** (0.687mmol, 1.5 equiv.), **K<sub>2</sub>CO<sub>3</sub>** (0.687mmol, 1.5 equiv.) and tetrabutylammonium hydrogen sulfate (**TBAHS**, 0.0458mmol, 0.1 equiv.) were added to 4 ml of DMSO or DMF, and product **6** was obtained by stirring at 70 °C until the reaction was completed (monitored by TLC). Then the reaction was extracted with EtOAc, washed with brine, drying over Na<sub>2</sub>SO<sub>4</sub>, evaporation, the product was obtained after purification by column chromatography.

**Ethyl (4R\*,5R\*)-5-((S\*)-hydroxy(phenyl)methyl)-2-methyl-4-(2-oxopropyl)-4,5-dihydrofuran-3-carboxylate**

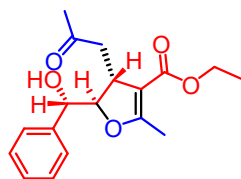

**(6aa):** New compound. Pale yellow solid. m.p.58°C.  $R_f=0.2$  (petroleum ether/EtOAc = 4:1)  
 $^1\text{H NMR}$  (400 MHz, Chloroform-*d*)  $\delta$  7.41 – 7.29 (m, 5H), 4.69 (d,  $J = 7.4$  Hz, 1H), 4.31 (dd,  $J = 7.4, 4.0$  Hz, 1H), 4.16 (p,  $J = 6.2, 5.3$  Hz, 3H), 3.67 – 3.59 (m, 1H), 3.13 (dd,  $J = 18.4, 2.9$  Hz, 1H), 2.56 (dd,  $J = 18.4, 10.5$  Hz, 1H), 2.19 – 2.12 (m, 6H), 1.29 (t,  $J = 7.1$  Hz, 3H).  $^{13}\text{C NMR}$  (101 MHz, Chloroform-*d*)  $\delta$  209.92, 168.32, 165.41, 140.43, 128.16, 127.94, 127.01, 103.98, 90.32, 74.60, 59.61, 47.61, 40.35, 30.03, 14.39. HRMS calcd for  $\text{C}_{18}\text{H}_{22}\text{O}_5$   $[\text{M} + \text{Na}]^+$ : 341.1359, found: 341.1360.

**Methyl (4R\*,5R\*)-5-((S\*)-hydroxy(phenyl)methyl)-2-methyl-4-(2-oxopropyl)-4,5-dihydrofuran-3-carboxylate**

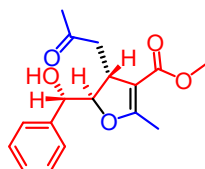

**(6ba):** New compound. Pale yellow oil.  $R_f=0.18$  (petroleum ether/EtOAc = 4:1)  
 $^1\text{H NMR}$  (400 MHz, Chloroform-*d*)  $\delta$  7.40 – 7.28 (m, 5H), 4.69 (d,  $J = 7.2$  Hz, 1H), 4.32 (dd,  $J = 7.2, 4.1$  Hz, 1H), 3.69 (s, 3H), 3.64 – 3.59 (m, 1H), 3.10 (dd,  $J = 18.3, 3.0$  Hz, 1H), 2.54 (dd,  $J = 18.3, 10.4$  Hz, 1H), 2.17 – 2.11 (m, 6H).  $^{13}\text{C NMR}$  (101 MHz, Chloroform-*d*)  $\delta$  209.72, 168.65, 165.78, 140.33, 128.15, 127.94, 127.00, 103.80, 90.42, 74.58, 50.81, 47.63, 40.25, 29.99, 14.32. HRMS calcd for  $\text{C}_{17}\text{H}_{20}\text{O}_5$   $[\text{M} + \text{Na}]^+$ : 327.1203, found: 327.1203.

**Ethyl (4R\*,5R\*)-5-((S\*)-1-hydroxyethyl)-2-methyl-4-(2-oxopropyl)-4,5-dihydrofuran-3-carboxylate**

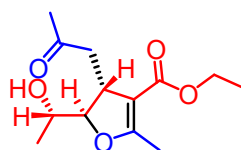

**(6da):** New compound. Pale yellow oil.  $R_f=0.1$  (petroleum ether/EtOAc = 4:1)  
 $^1\text{H NMR}$  (400 MHz, Chloroform-*d*)  $\delta$  4.18 (qd,  $J = 7.1, 2.4$  Hz, 2H), 4.03 (dd,  $J = 6.8, 4.2$  Hz, 1H), 3.82 (p,  $J = 6.5$  Hz, 1H), 3.49 – 3.43 (m, 1H), 3.24 (s, 1H), 3.18 (dd,  $J = 18.5, 2.8$  Hz, 1H), 2.58 (dd,  $J = 18.5, 10.5$  Hz, 1H), 2.21 – 2.17 (m, 6H), 1.28 (d,  $J = 7.2$  Hz, 3H), 1.22 (d,  $J = 6.2$  Hz, 3H).  $^{13}\text{C NMR}$  (101 MHz, Chloroform-*d*)  $\delta$  209.34, 168.46, 165.49, 103.90, 91.47, 68.87, 59.56, 47.91, 40.20, 30.11, 18.59, 14.36, 14.34. HRMS calcd for  $\text{C}_{13}\text{H}_{20}\text{O}_5$   $[\text{M} + \text{Na}]^+$ : 279.1203, found: 279.1207.

**Methyl (4R\*,5R\*)-5-((S\*)-1-hydroxyethyl)-2-methyl-4-(2-oxopropyl)-4,5-dihydrofuran-3-carboxylate**

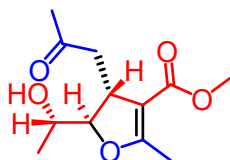

**(6ea):** New compound. Pale yellow oil.  $R_f=0.08$  (petroleum ether/EtOAc = 4:1)

$^1\text{H}$  NMR (400 MHz, Chloroform-d)  $\delta$  4.03 (dd,  $J = 6.8, 4.2$  Hz, 1H), 3.86 – 3.80 (m, 1H), 3.72 (s, 3H), 3.49 – 3.43 (m, 1H), 3.18 (dd,  $J = 18.5, 2.8$  Hz, 1H), 2.59 (dd,  $J = 18.5, 10.5$  Hz, 1H), 2.22 – 2.17 (m, 6H), 1.23 (d,  $J = 6.2$  Hz, 3H).  $^{13}\text{C}$  NMR (101 MHz, Chloroform-d)  $\delta$  209.29, 168.81, 165.89, 103.72, 91.57, 68.88, 50.81, 47.93, 40.13, 30.11, 18.59, 14.32. HRMS calcd for  $\text{C}_{12}\text{H}_{18}\text{O}_5$   $[\text{M} + \text{Na}]^+$ : 265.1046, found: 265.1049.

**Ethyl (4R\*,5R\*)-5-((S\*)-hydroxy(phenyl)methyl)-2-isopropyl-4-(3-methyl-2-oxobutyl)-4,5-dihydrofuran-3-carboxylate**

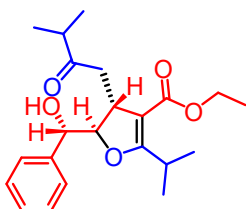

**(6ab):** New compound. Pale yellow oil.  $R_f=0.55$  (petroleum ether/EtOAc = 4:1)

$^1\text{H}$  NMR (400 MHz, Chloroform-d)  $\delta$  7.41 – 7.29 (m, 5H), 4.60 (dd,  $J = 8.3, 3.8$  Hz, 1H), 4.54 (d,  $J = 3.9$  Hz, 1H), 4.24 – 4.14 (m, 3H), 3.67 (ddd,  $J = 10.8, 3.8, 2.6$  Hz, 1H), 3.58 (p,  $J = 6.9$  Hz, 1H), 3.23 (dd,  $J = 18.8, 2.6$  Hz, 1H), 2.66 – 2.53 (m, 2H), 1.30 (t,  $J = 7.1$  Hz, 3H), 1.15 (d,  $J = 6.9$  Hz, 6H), 1.10 (d,  $J = 6.9$  Hz, 3H), 1.03 (d,  $J = 7.0$  Hz, 3H).  $^{13}\text{C}$  NMR (101 MHz, Chloroform-d)  $\delta$  216.63, 176.08, 165.31, 141.11, 128.03, 127.79, 127.17, 101.67, 90.26, 74.64, 59.51, 44.39, 40.97, 40.57, 26.98, 19.71, 19.45, 18.24, 18.19, 14.39. HRMS calcd for  $\text{C}_{22}\text{H}_{30}\text{O}_5$   $[\text{M} + \text{Na}]^+$ : 397.1985, found: 397.1985.

**Methyl (4R\*,5R\*)-5-((S\*)-hydroxy(phenyl)methyl)-2-isopropyl-4-(3-methyl-2-oxobutyl)-4,5-dihydrofuran-3-carboxylate**

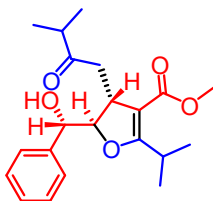

**(6bb):** New compound. Pale yellow oil.  $R_f=0.5$  (petroleum ether/EtOAc = 4:1)

$^1\text{H}$  NMR (400 MHz, Chloroform-d)  $\delta$  7.41 – 7.30 (m, 5H), 4.60 (dd,  $J = 8.2, 3.7$  Hz, 1H), 4.48 (d,  $J = 3.8$  Hz, 1H), 4.22 (dd,  $J = 8.2, 3.7$  Hz, 1H), 3.72 (s, 3H), 3.67 (ddd,  $J = 10.8, 3.8, 2.7$  Hz, 1H), 3.57 (p,  $J = 6.9$  Hz, 1H), 3.19 (dd,  $J = 18.7, 2.7$  Hz, 1H), 2.65 – 2.55 (m, 2H), 1.14 (d,  $J = 6.9$  Hz, 6H), 1.10 (d,  $J = 6.9$  Hz, 3H), 1.03 (d,  $J = 6.9$  Hz, 3H).  $^{13}\text{C}$  NMR (101 MHz, Chloroform-d)  $\delta$  216.51, 176.34, 165.74, 141.01, 128.04, 127.81, 127.17, 101.50, 90.36, 74.62, 50.83, 44.48, 40.96, 40.48, 26.96, 19.72, 19.49, 18.30, 18.12. HRMS calcd for  $\text{C}_{21}\text{H}_{28}\text{O}_5$   $[\text{M} + \text{Na}]^+$ : 383.1829, found: 383.1828.

**(4R\*,5R\*)-5-((S\*)-hydroxy(phenyl)methyl)-2-isopropyl-4-(3-methyl-2-oxobutyl)-4,5-dihydrofuran-3-carbonitrile**

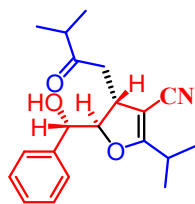

**(6cb):** New compound. Pale yellow oil.  $R_f=0.45$  (petroleum ether/EtOAc = 4:1)

$^1\text{H}$  NMR (400 MHz, Chloroform-d)  $\delta$  7.39 – 7.31 (m, 5H), 4.78 (d,  $J = 6.4$  Hz, 1H), 4.44 (dd,  $J = 6.4, 5.4$  Hz, 1H), 3.80 (s, 1H), 3.55 (ddd,  $J = 9.2, 5.3, 3.7$  Hz, 1H), 2.85 (dd,  $J = 18.5, 3.8$  Hz, 1H), 2.79 – 2.73 (m, 1H), 2.64 – 2.56 (m, 2H), 1.12 (d,  $J = 6.9$  Hz, 12H).  $^{13}\text{C}$  NMR (101 MHz, Chloroform-d)  $\delta$  213.94, 178.31, 139.54, 128.27, 128.20, 127.09, 115.90, 91.67, 82.47, 74.42, 44.03, 41.04, 40.37, 28.28, 19.64, 19.59, 18.16, 18.08. HRMS calcd for  $\text{C}_{20}\text{H}_{25}\text{NO}_3$   $[\text{M} + \text{Na}]^+$ : 350.1727, found: 350.1736.

**Ethyl (4R\*,5R\*)-5-((S\*)-1-hydroxyethyl)-2-isopropyl-4-(3-methyl-2-oxobutyl)-4,5-dihydrofuran-3-carboxylate**

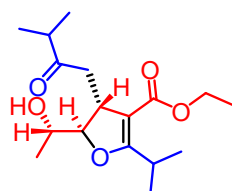

**(6db):** New compound. Pale yellow oil.  $R_f=0.4$  (petroleum ether/EtOAc = 4:1)

$^1\text{H}$  NMR (400 MHz, Chloroform-d)  $\delta$  4.23 – 4.13 (m, 2H), 3.96 (dd,  $J = 7.3, 3.7$  Hz, 1H), 3.78 (td,  $J = 6.9, 4.1$  Hz, 1H), 3.61 (p,  $J = 6.9$  Hz, 1H), 3.44 (ddd,  $J = 10.9, 3.8, 2.5$  Hz, 1H), 3.39 (d,  $J = 4.4$  Hz, 1H), 3.22 (dd,  $J = 18.6, 2.5$  Hz, 1H), 2.64 – 2.53 (m, 2H), 1.29 (t,  $J = 7.1$  Hz, 3H), 1.23 (d,  $J = 6.2$  Hz, 3H), 1.15 – 1.11 (m, 12H).  $^{13}\text{C}$  NMR (101 MHz, Chloroform-d)  $\delta$  215.79, 176.21, 165.36, 101.74, 91.17, 68.84, 59.44, 44.58, 40.94, 40.35, 27.00, 19.67, 19.37, 18.83, 18.18, 18.15, 14.35. HRMS calcd for  $\text{C}_{17}\text{H}_{28}\text{O}_5$   $[\text{M} + \text{Na}]^+$ : 335.1829, found: 335.1833.

**Methyl (4R\*,5R\*)-5-((S\*)-1-hydroxyethyl)-2-isopropyl-4-(3-methyl-2-oxobutyl)-4,5-dihydrofuran-3-carboxylate**

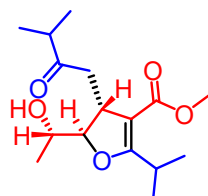

**(6eb):** New compound. Pale yellow oil.  $R_f=0.36$  (petroleum ether/EtOAc = 4:1)

$^1\text{H}$  NMR (400 MHz, Chloroform-d)  $\delta$  3.96 (dd,  $J = 7.2, 3.8$  Hz, 1H), 3.82 – 3.75 (m, 1H), 3.71 (s, 3H), 3.60 (p,  $J = 6.9$  Hz, 1H), 3.44 (ddd,  $J = 10.8, 3.8, 2.5$  Hz, 1H), 3.34 (d,  $J = 4.4$  Hz, 1H), 3.18 (dd,  $J = 18.6, 2.6$  Hz, 1H), 2.64 – 2.54 (m, 2H), 1.23 (d,  $J = 6.2$  Hz, 3H), 1.16 – 1.11 (m, 12H).  $^{13}\text{C}$  NMR (101 MHz, Chloroform-d)  $\delta$  215.66, 176.48, 165.78, 101.59, 91.28, 68.83, 50.74, 44.66, 40.94, 40.28, 26.98, 19.67, 19.39, 18.75, 18.21, 18.07. HRMS calcd for  $\text{C}_{16}\text{H}_{26}\text{O}_5$   $[\text{M} + \text{Na}]^+$ : 321.1672, found: 321.1676.

**Ethyl (4R\*,5R\*)-2-(tert-butyl)-4-(3,3-dimethyl-2-oxobutyl)-5-((S\*)-hydroxy(phenyl)methyl)-4,5-dihydrofuran-3-carboxylate**

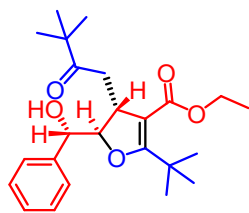

**(6ac):** New compound. Pale yellow solid. m.p.96°C.  $R_f=0.7$  ( petroleum ether/EtOAc = 4:1 )  
 $^1\text{H NMR}$  (400 MHz, Chloroform-d)  $\delta$  7.41 – 7.30 (m, 5H), 4.62 (dd,  $J = 8.4, 3.5$  Hz, 1H), 4.51 (d,  $J = 3.6$  Hz, 1H), 4.21 – 4.08 (m, 3H), 3.67 (dt,  $J = 11.0, 2.7$  Hz, 1H), 3.28 (dd,  $J = 18.9, 2.4$  Hz, 1H), 2.60 (dd,  $J = 18.9, 11.0$  Hz, 1H), 1.29 (t,  $J = 7.1$  Hz, 3H), 1.24 (s, 9H), 1.20 (s, 9H).  $^{13}\text{C NMR}$  (101 MHz, Chloroform-d)  $\delta$  218.31, 177.83, 164.66, 141.13, 128.00, 127.79, 127.15, 101.72, 89.24, 74.54, 59.57, 44.26, 42.70, 41.40, 34.50, 27.49, 26.48, 14.34. HRMS calcd for  $\text{C}_{24}\text{H}_{34}\text{O}_5$   $[\text{M} + \text{Na}]^+$ : 425.2298, found: 425.2296.

**Methyl (4R\*,5R\*)-2-(tert-butyl)-4-(3,3-dimethyl-2-oxobutyl)-5-((S\*)-hydroxy(phenyl)methyl)-4,5-dihydrofuran-3-carboxylate**

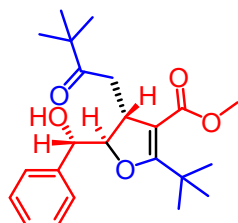

**(6bc):** New compound. Pale yellow oil.  $R_f=0.65$  ( petroleum ether/EtOAc = 4:1 )  
 $^1\text{H NMR}$  (400 MHz, Chloroform-d)  $\delta$  7.41 – 7.30 (m, 5H), 4.61 (dd,  $J = 8.3, 3.0$  Hz, 1H), 4.42 (d,  $J = 3.5$  Hz, 1H), 4.09 (dd,  $J = 8.3, 3.3$  Hz, 1H), 3.71 (s, 3H), 3.67 (dt,  $J = 10.9, 2.8$  Hz, 1H), 3.21 (dd,  $J = 18.9, 2.5$  Hz, 1H), 2.61 (dd,  $J = 18.9, 11.0$  Hz, 1H), 1.24 (s, 9H), 1.20 (s, 9H).  $^{13}\text{C NMR}$  (101 MHz, Chloroform-d)  $\delta$  218.18, 178.18, 165.08, 141.01, 128.02, 127.82, 127.14, 101.53, 89.38, 74.51, 50.81, 44.28, 42.57, 41.51, 34.53, 27.45, 26.46. HRMS calcd for  $\text{C}_{23}\text{H}_{32}\text{O}_5$   $[\text{M} + \text{Na}]^+$ : 411.2142, found: 411.2142.

**(4R\*,5R\*)-2-(tert-butyl)-4-(3,3-dimethyl-2-oxobutyl)-5-((S\*)-hydroxy(phenyl)methyl)-4,5-dihydrofuran-3-carbonitrile**

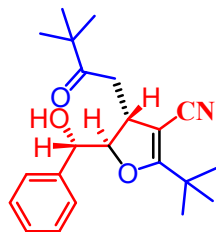

**(6cc):** New compound. Pale yellow solid. m.p.99°C.  $R_f=0.6$  ( petroleum ether/EtOAc = 4:1 )  
 $^1\text{H NMR}$  (400 MHz, Chloroform-d)  $\delta$  7.42 – 7.31 (m, 5H), 4.75 (d,  $J = 7.0$  Hz, 1H), 4.35 (dd,  $J = 7.0, 5.1$  Hz, 1H), 3.89 (s, 1H), 3.58 (ddd,  $J = 10.1, 5.1, 3.3$  Hz, 1H), 2.98 (dd,  $J = 18.7, 3.2$  Hz, 1H), 2.66 (dd,  $J = 18.7, 10.0$  Hz, 1H), 1.21 (d,  $J = 16.4$  Hz, 18H).  $^{13}\text{C NMR}$  (101 MHz, Chloroform-d)  $\delta$  215.96, 179.16, 139.87, 128.23, 128.17, 127.15, 116.52, 90.95, 74.61, 44.31, 41.94, 40.72, 34.55, 28.00, 26.44. HRMS calcd for  $\text{C}_{22}\text{H}_{29}\text{NO}_3$   $[\text{M} + \text{Na}]^+$ : 378.2040, found: 378.2042.

**Ethyl (4R\*,5R\*)-2-(tert-butyl)-4-(3,3-dimethyl-2-oxobutyl)-5-((S\*)-1-hydroxyethyl)-4,5-dihydrofuran-3-carboxylate**



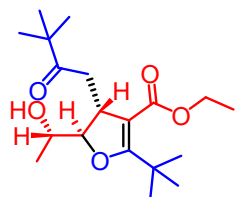

**(6dc):** New compound. Pale yellow oil.  $R_f=0.5$  ( petroleum ether/EtOAc = 4:1 )

$^1\text{H}$  NMR (400 MHz, Chloroform-d)  $\delta$  4.21 – 4.10 (m, 3H), 3.85 (dd,  $J = 7.6, 3.4$  Hz, 1H), 3.76 (ddd,  $J = 7.5, 6.0, 4.1$  Hz, 1H), 3.47 – 3.43 (m, 1H), 3.22 (dd,  $J = 18.7, 2.3$  Hz, 1H), 2.59 (dd,  $J = 18.7, 10.9$  Hz, 1H), 1.31 (s, 9H), 1.27 – 1.25 (m, 3H), 1.23 (d,  $J = 6.1$  Hz, 3H), 1.17 (s, 9H).  $^{13}\text{C}$  NMR (101 MHz, Chloroform-d)  $\delta$  217.40, 177.66, 164.78, 101.89, 90.03, 68.63, 59.50, 44.12, 42.27, 41.62, 34.57, 27.59, 26.42, 19.00, 14.28. HRMS calcd for  $\text{C}_{19}\text{H}_{32}\text{O}_5$   $[\text{M} + \text{Na}]^+$ : 363.2142, found: 363.2146.

**Methyl (4R\*,5R\*)-2-(tert-butyl)-4-(3,3-dimethyl-2-oxobutyl)-5-((S\*)-1-hydroxyethyl)-4,5-dihydrofuran-3-carboxylate**

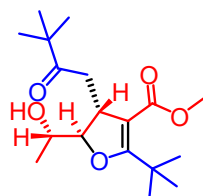

**(6ec):** New compound. Pale yellow oil.  $R_f=0.45$  ( petroleum ether/EtOAc = 4:1 )

$^1\text{H}$  NMR (400 MHz, Chloroform-d)  $\delta$  3.84 (dd,  $J = 7.5, 3.4$  Hz, 1H), 3.76 (ddd,  $J = 7.4, 6.0, 4.1$  Hz, 1H), 3.70 (s, 3H), 3.47 (ddd,  $J = 10.8, 3.4, 2.4$  Hz, 1H), 3.37 (d,  $J = 4.2$  Hz, 1H), 3.16 (dd,  $J = 18.7, 2.4$  Hz, 1H), 2.61 (dd,  $J = 18.7, 10.8$  Hz, 1H), 1.32 (s, 9H), 1.24 (d,  $J = 6.1$  Hz, 3H), 1.18 (s, 9H).  $^{13}\text{C}$  NMR (101 MHz, Chloroform-d)  $\delta$  165.20, 101.71, 90.18, 68.64, 50.73, 44.16, 42.19, 41.73, 34.61, 27.56, 26.41, 18.97. HRMS calcd for  $\text{C}_{18}\text{H}_{30}\text{O}_5$   $[\text{M} + \text{Na}]^+$ : 349.1985, found: 349.1989.

**Ethyl (4R\*,5R\*)-5-((S\*)-hydroxy(phenyl)methyl)-2-methyl-4-(2-oxo-2-phenylethyl)-4,5-dihydrofuran-3-carboxylate**

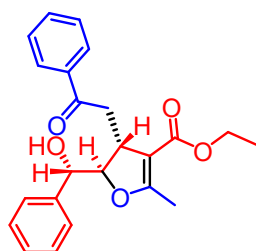

**(6ad):** New compound. Pale yellow solid. m.p.131°C.  $R_f=0.3$  ( petroleum ether/EtOAc = 4:1 )

$^1\text{H}$  NMR (400 MHz, Chloroform-d)  $\delta$  8.00 (d,  $J = 7.6$  Hz, 2H), 7.65 – 7.60 (m, 1H), 7.50 (t,  $J = 7.5$  Hz, 2H), 7.41 (d,  $J = 8.2$  Hz, 2H), 7.37 – 7.29 (m, 3H), 4.79 – 4.74 (m, 1H), 4.44 (dd,  $J = 7.7, 3.7$  Hz, 1H), 4.31 (d,  $J = 3.7$  Hz, 1H), 4.23 – 4.17 (m, 2H), 3.85 (dd,  $J = 11.7, 3.6$  Hz, 1H), 3.74 (dd,  $J = 18.1, 2.6$  Hz, 1H), 3.09 (dd,  $J = 18.1, 10.8$  Hz, 1H), 2.20 (s, 3H), 1.30 (td,  $J = 7.1, 1.1$  Hz, 3H).  $^{13}\text{C}$  NMR (101 MHz, Chloroform-d)  $\delta$  200.66, 168.53, 165.47, 140.48, 136.29, 133.70, 128.69, 128.28, 128.12, 127.94, 127.05, 104.12, 90.34, 74.78, 59.63, 42.68, 40.89, 14.41. HRMS calcd for  $\text{C}_{23}\text{H}_{24}\text{O}_5$   $[\text{M} + \text{Na}]^+$ : 403.1516, found: 403.1519.

**Methyl (4R\*,5R\*)-5-((S\*)-hydroxy(phenyl)methyl)-2-methyl-4-(2-oxo-2-phenylethyl)-4,5-dihydrofuran-3-carboxylate**

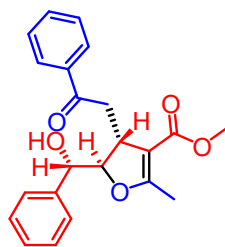

**(6bd):** New compound. Pale yellow oil.  $R_f=0.27$  (petroleum ether/EtOAc = 4:1)

$^1\text{H}$  NMR (400 MHz, Chloroform- $d$ )  $\delta$  8.01 – 7.96 (m, 2H), 7.64 – 7.59 (m, 1H), 7.52 – 7.47 (m, 2H), 7.42 – 7.39 (m, 2H), 7.37 – 7.29 (m, 3H), 4.78 (dd,  $J$  = 7.3, 3.7 Hz, 1H), 4.45 (dd,  $J$  = 7.3, 3.8 Hz, 1H), 4.22 (d,  $J$  = 3.7 Hz, 1H), 3.83 (dddd,  $J$  = 10.7, 4.1, 2.8, 1.5 Hz, 1H), 3.72 (m, 4H), 3.09 (dd,  $J$  = 18.1, 10.7 Hz, 1H), 2.19 (d,  $J$  = 1.3 Hz, 3H).  $^{13}\text{C}$  NMR (101 MHz, Chloroform- $d$ )  $\delta$  200.54, 168.82, 165.85, 140.39, 136.35, 133.65, 128.67, 128.26, 128.11, 127.94, 127.06, 103.96, 90.50, 74.77, 50.84, 42.73, 40.81, 14.35. HRMS calcd for  $\text{C}_{22}\text{H}_{22}\text{O}_5$  [ $\text{M} + \text{Na}$ ] $^+$ : 389.1359, found: 389.1370.

**Ethyl (4R\*,5R\*)-5-((S\*)-1-hydroxyethyl)-2-methyl-4-(2-oxo-2-phenylethyl)-4,5-dihydrofuran-3-carboxylate**

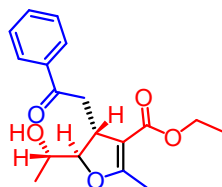

**(6dd):** New compound. Pale yellow oil.  $R_f=0.2$  (petroleum ether/EtOAc = 4:1)

$^1\text{H}$  NMR (400 MHz, Chloroform- $d$ )  $\delta$  8.03 – 7.98 (m, 2H), 7.51 – 7.41 (m, 3H), 4.23 – 4.16 (m, 3H), 3.91 (td,  $J$  = 6.5, 4.3 Hz, 1H), 3.77 (dd,  $J$  = 17.7, 2.6 Hz, 1H), 3.67 (dddd,  $J$  = 10.7, 4.0, 2.6, 1.3 Hz, 1H), 3.31 (d,  $J$  = 4.5 Hz, 1H), 3.06 (dd,  $J$  = 17.7, 10.7 Hz, 1H), 2.26 (d,  $J$  = 1.3 Hz, 3H), 1.30 (t,  $J$  = 7.1 Hz, 3H), 1.23 (d,  $J$  = 6.2 Hz, 3H).  $^{13}\text{C}$  NMR (101 MHz, Chloroform- $d$ )  $\delta$  200.30, 168.70, 165.58, 136.47, 133.57, 128.68, 128.21, 104.16, 91.43, 68.91, 59.61, 43.08, 40.66, 18.59, 14.40, 14.39. HRMS calcd for  $\text{C}_{18}\text{H}_{22}\text{O}_5$  [ $\text{M} + \text{Na}$ ] $^+$ : 341.1359, found: 341.1363.

**Methyl (4R\*,5R\*)-5-((S\*)-1-hydroxyethyl)-2-methyl-4-(2-oxo-2-phenylethyl)-4,5-dihydrofuran-3-carboxylate**

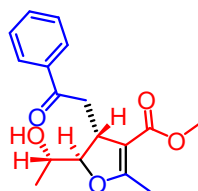

**(6ed):** New compound. Pale yellow oil.  $R_f=0.18$  (petroleum ether/EtOAc = 4:1)

$^1\text{H}$  NMR (400 MHz, Chloroform- $d$ )  $\delta$  8.01 – 7.97 (m, 2H), 7.51 – 7.40 (m, 3H), 4.17 (dd,  $J$  = 6.6, 3.9 Hz, 1H), 3.91 (ddd,  $J$  = 9.2, 6.6, 3.6 Hz, 1H), 3.76 – 3.70 (m, 4H), 3.65 (dtd,  $J$  = 4.0, 3.3, 2.6, 1.2 Hz, 1H), 3.35 (d,  $J$  = 4.5 Hz, 1H), 3.07 (dd,  $J$  = 17.8, 10.5 Hz, 1H), 2.25 (d,  $J$  = 1.3 Hz, 3H), 1.23 (d,  $J$  = 6.3 Hz, 3H).  $^{13}\text{C}$  NMR (101 MHz, Chloroform- $d$ )  $\delta$  200.21, 169.01, 165.97, 136.48, 133.56, 128.67, 128.20, 103.98, 91.58, 68.90, 50.83, 43.10, 40.58, 18.51, 14.35. HRMS calcd for  $\text{C}_{17}\text{H}_{20}\text{O}_5$  [ $\text{M} + \text{Na}$ ] $^+$ : 327.1203, found: 327.1207.

**Ethyl (4R\*,5R\*)-4-(2-cyclopropyl-2-oxoethyl)-5-((S\*)-hydroxy(phenyl)methyl)-2-methyl-4,5-dihydrofuran-3-carboxylate**

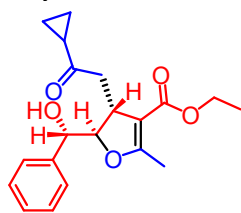

**(6ae<sub>1</sub>):** New compound. Pale yellow solid. m.p.83°C.  $R_f=0.25$  (petroleum ether/EtOAc = 4:1)  
 $^1\text{H NMR}$  (400 MHz, Chloroform-d)  $\delta$  7.40 – 7.30 (m, 5H), 4.65 (dd,  $J = 7.9, 3.7$  Hz, 1H), 4.45 (d,  $J = 3.8$  Hz, 1H), 4.29 (dd,  $J = 7.9, 3.8$  Hz, 1H), 4.20 (q,  $J = 7.1$  Hz, 2H), 3.70 – 3.63 (m, 1H), 3.32 (dd,  $J = 18.6, 2.7$  Hz, 1H), 2.74 (dd,  $J = 18.6, 10.8$  Hz, 1H), 2.16 (d,  $J = 1.3$  Hz, 3H), 1.94 (td,  $J = 7.8, 3.9$  Hz, 1H), 1.30 (t,  $J = 7.1$  Hz, 3H), 1.16 – 1.09 (m, 2H), 0.96 (ddd,  $J = 7.5, 3.4, 2.1$  Hz, 2H).  $^{13}\text{C NMR}$  (101 MHz, Chloroform-d)  $\delta$  212.11, 168.24, 165.44, 140.84, 128.08, 127.84, 127.06, 103.94, 90.38, 74.74, 59.56, 47.00, 40.63, 21.00, 14.40, 14.34, 11.40, 11.37. HRMS calcd for  $\text{C}_{20}\text{H}_{24}\text{O}_5$   $[\text{M} + \text{Na}]^+$ : 367.1516, found: 367.1512.

**Ethyl (4R\*,5R\*)-2-cyclopropyl-5-((S\*)-hydroxy(phenyl)methyl)-4-(2-oxopropyl)-4,5-dihydrofuran-3-carboxylate**

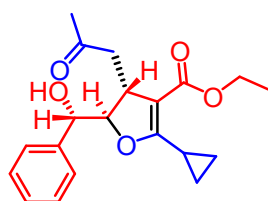

**(6ae<sub>2</sub>):** New compound. Pale yellow oil.  $R_f=0.22$  (petroleum ether/EtOAc = 4:1)  
 $^1\text{H NMR}$  (400 MHz, Chloroform-d)  $\delta$  7.36 – 7.29 (m, 5H), 4.58 (dd,  $J = 8.2, 3.3$  Hz, 1H), 4.25 – 4.17 (m, 4H), 3.70 (dt,  $J = 10.7, 3.2$  Hz, 1H), 3.18 (dd,  $J = 18.5, 2.8$  Hz, 1H), 2.68 – 2.62 (m, 1H), 2.57 (dd,  $J = 18.5, 10.7$  Hz, 1H), 2.18 (s, 3H), 1.31 (t,  $J = 7.1$  Hz, 3H), 0.90 – 0.79 (m, 4H).  $^{13}\text{C NMR}$  (101 MHz, Chloroform-d)  $\delta$  210.28, 171.82, 165.90, 140.84, 128.11, 127.88, 127.00, 103.06, 89.80, 74.62, 59.51, 47.65, 41.09, 30.00, 14.46, 9.23, 7.97, 7.47. HRMS calcd for  $\text{C}_{20}\text{H}_{24}\text{O}_5$   $[\text{M} + \text{Na}]^+$ : 367.1516, found: 367.1511.

**Methyl (4R\*,5R\*)-4-(2-cyclopropyl-2-oxoethyl)-5-((S\*)-hydroxy(phenyl)methyl)-2-methyl-4,5-dihydrofuran-3-carboxylate**

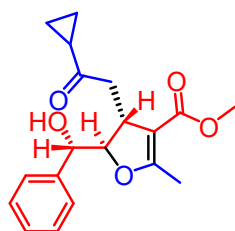

**(6be<sub>1</sub>):** New compound. Pale yellow oil.  $R_f=0.23$  (petroleum ether/EtOAc = 4:1)  
 $^1\text{H NMR}$  (400 MHz, Chloroform-d)  $\delta$  7.39 – 7.30 (m, 5H), 4.65 (dd,  $J = 7.7, 3.3$  Hz, 1H), 4.44 (d,  $J = 3.8$  Hz, 1H), 4.29 (dd,  $J = 7.7, 3.9$  Hz, 1H), 3.72 (s, 3H), 3.67 – 3.63 (m, 1H), 3.30 (dd,  $J = 18.6, 2.8$  Hz, 1H), 2.74 (dd,  $J = 18.6, 10.8$  Hz, 1H), 2.15 (d,  $J = 1.3$  Hz, 3H), 1.97 – 1.91 (m, 1H), 1.12 (dd,  $J = 4.4, 2.9$  Hz, 2H), 0.98 – 0.93 (m, 2H).  $^{13}\text{C NMR}$  (101 MHz, Chloroform-d)  $\delta$  212.02, 168.59, 165.86, 140.73, 128.08, 127.86, 127.06, 103.74, 90.47, 74.72, 50.82, 47.09, 40.53, 20.99, 14.31, 11.44. HRMS calcd for  $\text{C}_{19}\text{H}_{22}\text{O}_5$   $[\text{M} + \text{Na}]^+$ : 353.1359, found: 353.1360.

**Methyl (4R\*,5R\*)-2-cyclopropyl-5-((S\*)-hydroxy(phenyl)methyl)-4-(2-oxopropyl)-4,5-dihydrofuran-3-carboxylate**

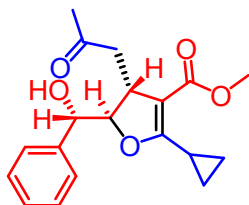

**(6be<sub>2</sub>):** New compound. Pale yellow solid. m.p.89°C.  $R_f=0.2$  ( petroleum ether/EtOAc = 4:1 )

<sup>1</sup>H NMR (400 MHz, Chloroform-d)  $\delta$  7.36 – 7.29 (m, 5H), 4.58 (dd, J = 8.1, 2.9 Hz, 1H), 4.26 (d, J = 3.5 Hz, 1H), 4.19 (dd, J = 8.1, 3.6 Hz, 1H), 3.74 (s, 3H), 3.72 – 3.66 (m, 1H), 3.16 (dd, J = 18.5, 2.9 Hz, 1H), 2.64 (ddd, J = 8.0, 4.3, 2.0 Hz, 1H), 2.56 (dd, J = 18.5, 10.6 Hz, 1H), 2.18 (s, 3H), 0.89 – 0.80 (m, 4H). <sup>13</sup>C NMR (101 MHz, Chloroform-d)  $\delta$  210.22, 172.14, 166.30, 140.76, 128.11, 127.89, 127.01, 102.86, 89.88, 74.61, 50.78, 47.65, 41.01, 29.98, 9.25, 8.04, 7.54. HRMS calcd for C<sub>19</sub>H<sub>22</sub>O<sub>5</sub> [M + Na]<sup>+</sup>: 353.1359, found: 353.1362.

**Ethyl (4R\*,5R\*)-4-(2-cyclopropyl-2-oxoethyl)-5-((S\*)-1-hydroxyethyl)-2-methyl-4,5-dihydrofuran-3-carboxylate**

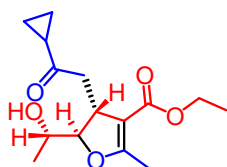

**(6de<sub>1</sub>):** New compound. Pale yellow oil.  $R_f=0.17$  ( petroleum ether/EtOAc = 4:1 )

<sup>1</sup>H NMR (400 MHz, Chloroform-d)  $\delta$  4.23 – 4.17 (m, 2H), 4.01 (dd, J = 7.2, 4.1 Hz, 1H), 3.80 (td, J = 6.6, 3.7 Hz, 1H), 3.49 (dddd, J = 6.8, 4.1, 2.7, 1.5 Hz, 2H), 3.37 – 3.32 (m, 1H), 2.72 (dd, J = 18.4, 10.8 Hz, 1H), 2.21 (d, J = 1.3 Hz, 3H), 1.96 – 1.92 (m, 1H), 1.31 (t, J = 7.1 Hz, 3H), 1.22 (d, J = 6.2 Hz, 3H), 1.08 (dtd, J = 6.9, 3.5, 1.5 Hz, 2H), 0.95 – 0.92 (m, 2H). <sup>13</sup>C NMR (101 MHz, Chloroform-d)  $\delta$  211.53, 168.39, 165.55, 103.96, 91.48, 68.90, 59.54, 47.43, 40.38, 20.91, 18.80, 14.39, 14.35, 11.21, 11.16. HRMS calcd for C<sub>15</sub>H<sub>22</sub>O<sub>5</sub> [M + Na]<sup>+</sup>: 305.1359, found: 305.1367.

**Ethyl (4R\*,5R\*)-2-cyclopropyl-5-((S\*)-1-hydroxyethyl)-4-(2-oxopropyl)-4,5-dihydrofuran-3-carboxylate**

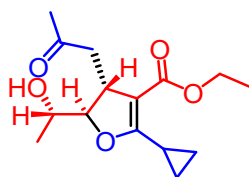

**(6de<sub>2</sub>):** New compound. Pale yellow oil.  $R_f=0.14$  ( petroleum ether/EtOAc = 4:1 )

<sup>1</sup>H NMR (400 MHz, Chloroform-d)  $\delta$  4.24 – 4.19 (m, 2H), 3.93 (dd, J = 7.2, 3.8 Hz, 1H), 3.79 – 3.72 (m, 1H), 3.48 (ddd, J = 10.6, 3.8, 2.7 Hz, 1H), 3.20 (dd, J = 18.5, 2.7 Hz, 2H), 2.70 (ddd, J = 8.3, 5.8, 3.1 Hz, 1H), 2.59 (dd, J = 18.5, 10.6 Hz, 1H), 2.19 (s, 3H), 1.31 (t, J = 7.1 Hz, 3H), 1.17 (d, J = 6.2 Hz, 3H), 0.97 – 0.88 (m, 4H). <sup>13</sup>C NMR (101 MHz, Chloroform-d)  $\delta$  209.59, 171.87, 165.95, 103.08, 90.89, 68.76, 59.46, 47.86, 40.70, 30.09, 18.85, 14.44, 9.20, 8.10, 7.41. HRMS calcd for C<sub>15</sub>H<sub>22</sub>O<sub>5</sub> [M + Na]<sup>+</sup>: 305.1359, found: 305.1366.

**Methyl (4R\*,5R\*)-4-(2-cyclopropyl-2-oxoethyl)-5-((S\*)-1-hydroxyethyl)-2-methyl-4,5-dihydrofuran-3-carboxylate**

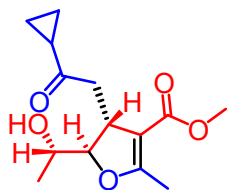

**(6ee<sub>1</sub>):** New compound. Pale yellow oil.  $R_f=0.15$  (petroleum ether/EtOAc = 4:1)

<sup>1</sup>H NMR (400 MHz, Chloroform-*d*)  $\delta$  4.00 (dd,  $J = 7.0, 4.1$  Hz, 1H), 3.78 (tt,  $J = 6.6, 3.4$  Hz, 1H), 3.71 (s, 3H), 3.50 (d,  $J = 4.3$  Hz, 1H), 3.48 – 3.42 (m, 1H), 3.30 (dd,  $J = 18.3, 2.6$  Hz, 1H), 2.70 (dd,  $J = 18.3, 10.7$  Hz, 1H), 2.19 (d,  $J = 1.3$  Hz, 3H), 1.92 (ddd,  $J = 7.8, 4.5, 3.2$  Hz, 1H), 1.19 (d,  $J = 6.3$  Hz, 3H), 1.08 – 1.03 (m, 2H), 0.93 – 0.89 (m, 2H). <sup>13</sup>C NMR (101 MHz, Chloroform-*d*)  $\delta$  211.40, 168.76, 165.93, 103.76, 91.54, 68.84, 50.76, 47.48, 40.25, 20.88, 18.64, 14.28, 11.21, 11.17. HRMS calcd for C<sub>14</sub>H<sub>20</sub>O<sub>5</sub> [M + Na]<sup>+</sup>: 291.1203, found: 291.1203.

**Methyl (4R\*,5R\*)-2-cyclopropyl-5-((S\*)-1-hydroxyethyl)-4-(2-oxopropyl)-4,5-dihydrofuran-3-carboxylate**

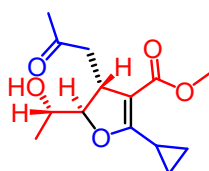

**(6ee<sub>2</sub>):** New compound. Pale yellow oil.  $R_f=0.11$  (petroleum ether/EtOAc = 4:1)

<sup>1</sup>H NMR (400 MHz, Chloroform-*d*)  $\delta$  3.96 – 3.91 (m, 1H), 3.77 – 3.74 (m, 1H), 3.73 (s, 3H), 3.46 (ddd,  $J = 10.6, 3.8, 2.7$  Hz, 1H), 3.24 (d,  $J = 4.2$  Hz, 1H), 3.17 (dd,  $J = 18.5, 2.7$  Hz, 1H), 2.72 – 2.65 (m, 1H), 2.58 (dd,  $J = 18.5, 10.6$  Hz, 1H), 2.18 (s, 3H), 1.16 (d,  $J = 6.2$  Hz, 3H), 0.98 – 0.88 (m, 4H). <sup>13</sup>C NMR (101 MHz, Chloroform-*d*)  $\delta$  209.53, 172.20, 166.35, 102.87, 90.97, 68.74, 50.73, 47.85, 40.62, 30.08, 18.76, 9.21, 8.16, 7.46. HRMS calcd for C<sub>14</sub>H<sub>20</sub>O<sub>5</sub> [M + Na]<sup>+</sup>: 291.1203, found: 291.1204.

#### 4. Preparation method of 7

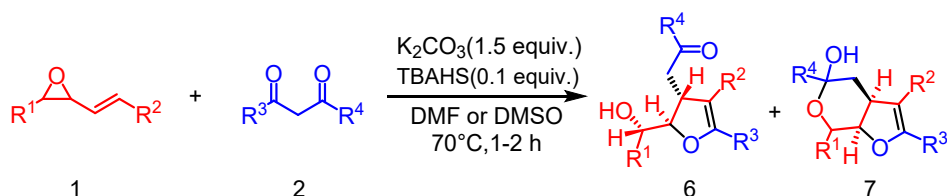

After the reaction of  $\alpha,\beta$ -unsaturated epoxides with  $\beta$ -dicarbonyl compounds is completed, the product **6** will partially undergo hemiketal reaction to obtain **7**. Because the hemiketal is a six-membered ring structure, product **10** is relatively stable, like fructose, it is stable as a six-ring hemiketal.

**Ethyl (3aS\*,7aR\*)-5-hydroxy-2,5-dimethyl-7-phenyl-3a,4,7,7a-tetrahydro-5H-furo[2,3-*c*]pyran-3-carboxylate**

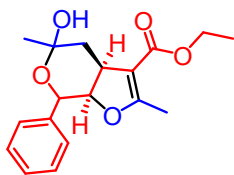

**(7aa):** New compound. Pale yellow oil. Rf=0.28 ( petroleum ether/EtOAc = 4:1 )

<sup>1</sup>H NMR (400 MHz, Chloroform-d) δ 7.48 – 7.45 (m, 2H), 7.42 – 7.31 (m, 5H), 4.91 (d, J = 9.3 Hz, 1H), 4.63 (t, J = 9.5 Hz, 1H), 4.21 (dddd, J = 16.8, 10.8, 7.1, 3.4 Hz, 3H), 3.34 – 3.24 (m, 1H), 2.43 (dd, J = 14.2, 5.2 Hz, 1H), 2.22 (d, J = 1.2 Hz, 3H), 1.93 – 1.86 (m, 1H), 1.53 (s, 3H), 1.30 (d, J = 7.1 Hz, 3H). <sup>13</sup>C NMR (101 MHz, Chloroform-d) δ 169.28, 165.78, 139.88, 128.46, 128.04, 126.64, 106.07, 97.26, 84.81, 71.34, 59.58, 39.01, 36.30, 28.45, 14.39, 14.37. HRMS calcd for C<sub>18</sub>H<sub>22</sub>O<sub>5</sub> [M + Na]<sup>+</sup>: 341.1359, found: 341.1359.

**Methyl (3aS\*,7aR\*)-5-hydroxy-2,5-dimethyl-7-phenyl-3a,4,7,7a-tetrahydro-5H-furo[2,3-c]pyran-3-carboxylate**

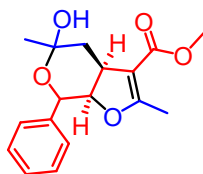

**(7ba):** New compound. Pale yellow oil. Rf=0.25 ( petroleum ether/EtOAc = 4:1 )

<sup>1</sup>H NMR (400 MHz, Chloroform-d) δ 7.48 – 7.45 (m, 2H), 7.42 – 7.37 (m, 3H), 4.91 (d, J = 9.3 Hz, 1H), 4.64 (t, J = 9.5 Hz, 1H), 3.75 (s, 3H), 3.34 – 3.24 (m, 1H), 2.42 (dd, J = 14.2, 5.1 Hz, 1H), 2.22 (d, J = 1.2 Hz, 3H), 1.88 (t, J = 13.5 Hz, 1H), 1.53 (s, 3H). <sup>13</sup>C NMR (101 MHz, Chloroform-d) δ 169.66, 166.21, 139.81, 128.49, 128.09, 126.64, 105.86, 97.27, 84.88, 77.39, 71.33, 50.92, 38.93, 36.27, 28.51, 14.37. HRMS calcd for C<sub>17</sub>H<sub>20</sub>O<sub>5</sub> [M + Na]<sup>+</sup>: 327.1203, found: 327.1203.

**Ethyl (4S\*,5R\*)-5-((S\*)-hydroxy(phenyl)methyl)-4-((Z)-2-hydroxy-2-phenylvinyl)-2-methyl-4,5-dihydrofuran-3-carboxylate and Ethyl (4S\*,5R\*)-5-((S\*)-hydroxy(phenyl)methyl)-2-methyl-4-(2-oxo-2-phenylethyl)-4,5-dihydrofuran-3-carboxylate**

We took the HSQC spectrum and also took IR spectra of the compound both by tablet method of the crystals and by solution method in CHCl<sub>3</sub>. The tablet method showed absorption by stretches of phenyl ketone functionality (1650 cm<sup>-1</sup>) and alkene functionality (1650cm<sup>-1</sup>) and ester functionality (1690 cm<sup>-1</sup>), the solution method only indicated ester functionality (1690 cm<sup>-1</sup>) and alkene functionality (1640 cm<sup>-1</sup>).

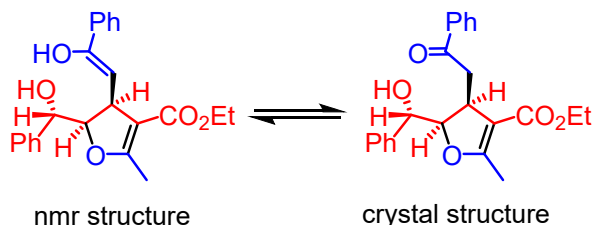

**(cis-6ad):** New compound. yellow solid. m.p.147°C. Rf=0.28 ( petroleum ether/EtOAc = 4:1 )

<sup>1</sup>H NMR (400 MHz, Chloroform-d) δ 7.65 (dd, J = 8.1, 1.7 Hz, 2H), 7.51 (dt, J = 6.5, 1.5 Hz, 2H), 7.47 – 7.42 (m, 3H), 7.36 – 7.31 (m, 3H), 6.04 (d, J = 4.0 Hz, 1H), 4.89 (dd, J = 9.3, 8.2 Hz, 1H), 4.79 (d, J = 8.2 Hz, 1H), 4.33 – 4.23 (m, 2H), 4.06 (ddd, J = 9.3, 3.9, 1.7 Hz, 1H), 2.26 (d, J = 1.6 Hz, 3H), 1.38 (t, J = 7.1

Hz, 3H). <sup>13</sup>C NMR (101 MHz, Chloroform-d) δ 167.35, 165.70, 152.19, 138.53, 134.79, 128.51, 128.40, 128.37, 128.22, 127.15, 124.80, 107.40, 98.61, 81.54, 76.38, 59.74, 39.90, 14.51, 14.39. HRMS calcd for C<sub>23</sub>H<sub>24</sub>O<sub>5</sub> [M + Na]<sup>+</sup>: 403.1516, found: 403.1519.

## 5. General procedure for the 8 derivatization reaction

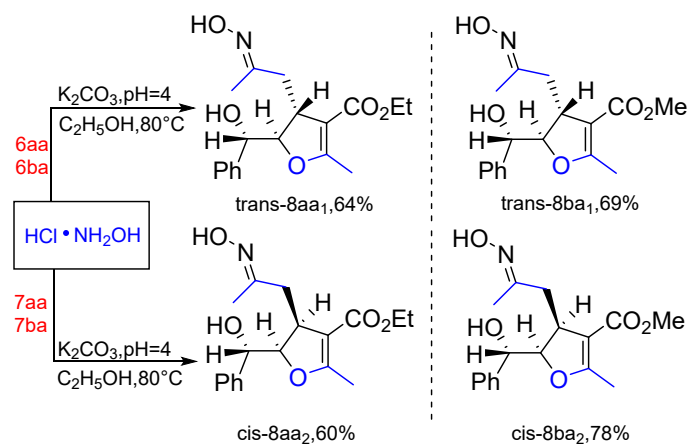

**6** or **7** (0.329mmol, 1 equiv.) and hydroxylamine hydrochloride (0.658mmol, 2 equiv.) were added to 4ml of ethanol, adjusted to pH=4 by  $K_2CO_3$  (2 M in  $H_2O$ ), and reacted for 2h at 80 degrees. The product was obtained after purification by column chromatography.

### Ethyl (4R\*,5R\*)-5-((S\*)-hydroxy(phenyl)methyl)-4-((E)-2-(hydroxyimino)propyl)-2-methyl-4,5-dihydrofuran-3-carboxylate

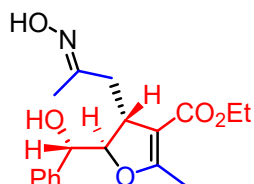

**(8aa<sub>1</sub>)**: New compound. white solid. m.p.186°C. Rf=0.16 (petroleum ether/EtOAc = 4:1)  
<sup>1</sup>H NMR (400 MHz, Chloroform-d) δ 9.67 (s, 1H), 7.42 – 7.31 (m, 5H), 6.53 (s, 1H), 4.63 (d, *J* = 8.9 Hz, 1H), 4.41 (dd, *J* = 8.9, 3.4 Hz, 1H), 4.23 (qd, *J* = 7.1, 2.9 Hz, 2H), 3.77 – 3.70 (m, 1H), 2.88 (dd, *J* = 17.7, 2.6 Hz, 1H), 2.25 – 2.17 (m, 4H), 1.81 (s, 3H), 1.33 (t, *J* = 7.1 Hz, 3H). <sup>13</sup>C NMR (101 MHz, Chloroform-d) δ 168.09, 165.62, 157.18, 141.06, 128.16, 127.84, 127.05, 104.72, 89.57, 74.86, 59.59, 41.43, 39.67, 14.86, 14.42, 14.33. HRMS calcd for C<sub>18</sub>H<sub>23</sub>NO<sub>5</sub> [M + Na]<sup>+</sup>: 356.1468, found: 356.1468.

### Ethyl (4S\*,5R\*)-5-((S\*)-hydroxy(phenyl)methyl)-4-((E)-2-(hydroxyimino)propyl)-2-methyl-4,5-dihydrofuran-3-carboxylate

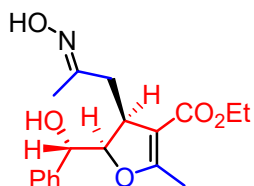

**(8aa<sub>2</sub>)**: New compound. white solid. m.p.177°C. Rf=0.16 (petroleum ether/EtOAc = 4:1)

$^1\text{H}$  NMR (400 MHz, Chloroform-*d*)  $\delta$  7.44 – 7.33 (m, 5H), 4.87 (d,  $J$  = 9.7 Hz, 1H), 4.48 (dd,  $J$  = 9.7, 7.4 Hz, 1H), 4.21 (q,  $J$  = 7.1 Hz, 2H), 3.53 (t,  $J$  = 8.1 Hz, 1H), 2.70 (dd,  $J$  = 16.7, 8.9 Hz, 1H), 2.39 (dd,  $J$  = 16.8, 2.6 Hz, 1H), 2.09 (d,  $J$  = 1.0 Hz, 3H), 2.00 (s, 3H), 1.31 (t,  $J$  = 7.1 Hz, 3H).  $^{13}\text{C}$  NMR (101 MHz, Chloroform-*d*)  $\delta$  168.80, 165.51, 159.50, 140.73, 128.22, 127.96, 127.13, 108.68, 88.09, 70.50, 59.61, 40.57, 35.11, 14.70, 14.41. HRMS calcd for  $\text{C}_{18}\text{H}_{23}\text{NO}_5$  [ $\text{M} + \text{Na}$ ] $^+$ : 356.1468, found: 356.1468.

**Methyl (4R\*,5R\*)-5-((S\*)-hydroxy(phenyl)methyl)-4-((E)-2-(hydroxyimino)propyl)-2-methyl-4,5-dihydrofuran-3-carboxylate**

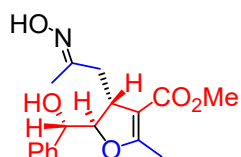

**(8ba<sub>1</sub>)**: New compound. white solid. m.p.189°C. Rf=0.13 ( petroleum ether/EtOAc = 4:1 )

$^1\text{H}$  NMR (400 MHz, Chloroform-*d*)  $\delta$  7.40 – 7.31 (m, 5H), 4.63 (d,  $J$  = 8.6 Hz, 1H), 4.42 (dd,  $J$  = 8.6, 3.3 Hz, 1H), 3.75 (s, 3H), 3.71 (d,  $J$  = 11.7 Hz, 1H), 2.85 (dd,  $J$  = 17.5, 2.6 Hz, 1H), 2.26 – 2.17 (m, 4H), 1.82 (s, 3H).  $^{13}\text{C}$  NMR (101 MHz, Chloroform-*d*)  $\delta$  168.43, 166.00, 157.47, 140.92, 128.19, 127.86, 126.99, 104.59, 89.70, 50.83, 41.28, 39.75, 14.75, 14.30. HRMS calcd for  $\text{C}_{17}\text{H}_{21}\text{NO}_5$  [ $\text{M} + \text{Na}$ ] $^+$ : 342.1312, found: 342.1312.

**Methyl (4S\*,5R\*)-5-((S\*)-hydroxy(phenyl)methyl)-4-((E)-2-(hydroxyimino)propyl)-2-methyl-4,5-dihydrofuran-3-carboxylate**

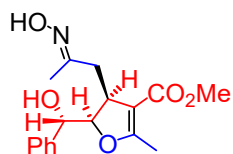

**(8ba<sub>2</sub>)**: New compound. white solid. m.p.179°C. Rf=0.13 ( petroleum ether/EtOAc = 4:1 )

$^1\text{H}$  NMR (400 MHz, Chloroform-*d*)  $\delta$  7.41 – 7.33 (m, 5H), 4.81 (d,  $J$  = 9.8 Hz, 1H), 4.46 (dd,  $J$  = 9.8, 7.2 Hz, 1H), 3.73 (s, 3H), 3.52 (dddd,  $J$  = 8.2, 7.2, 2.7, 1.4 Hz, 1H), 2.65 (dd,  $J$  = 17.1, 9.2 Hz, 1H), 2.35 (dd,  $J$  = 17.1, 2.3 Hz, 1H), 2.08 (d,  $J$  = 1.0 Hz, 3H), 1.97 (s, 3H).  $^{13}\text{C}$  NMR (101 MHz, Chloroform-*d*)  $\delta$  169.14, 165.95, 159.25, 140.52, 128.25, 128.02, 127.15, 108.54, 88.14, 70.48, 50.94, 40.43, 35.15, 14.85, 14.42. HRMS calcd for  $\text{C}_{17}\text{H}_{21}\text{NO}_5$  [ $\text{M} + \text{Na}$ ] $^+$ : 342.1312, found: 342.1313.



## 6.X-Ray crystallography data

### Crystal Structure of 6aa

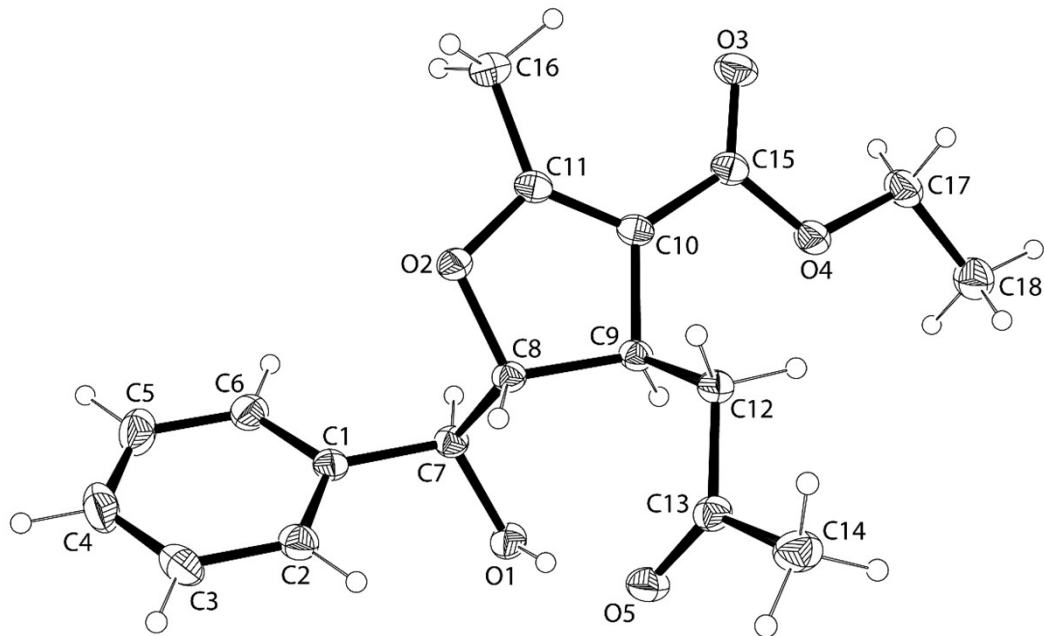

Bond precision: C-C = 0.0021 Å      Wavelength=1.54178  
Cell:            a=9.2088 (4)      b=9.7622 (4)      c=21.0942 (8)  
                  alpha=78.302 (2)    beta=89.303 (2)    gamma=64.975 (1)  
Temperature:    173 K

|                        | Calculated   | Reported     |
|------------------------|--------------|--------------|
| Volume                 | 1676.82 (12) | 1676.82 (12) |
| Space group            | P -1         | P -1         |
| Hall group             | -P 1         | -P 1         |
| Moiety formula         | C18 H22 O5   | C18 H22 O5   |
| Sum formula            | C18 H22 O5   | C18 H22 O5   |
| Mr                     | 318.36       | 318.35       |
| Dx, g cm <sup>-3</sup> | 1.261        | 1.261        |
| Z                      | 4            | 4            |
| Mu (mm <sup>-1</sup> ) | 0.752        | 0.752        |
| F000                   | 680.0        | 680.0        |
| F000'                  | 682.21       |              |
| h, k, lmax             | 11, 11, 25   | 11, 11, 25   |
| Nref                   | 6130         | 6072         |
| Tmin, Tmax             | 0.900, 0.921 | 0.704, 0.753 |
| Tmin'                  | 0.900        |              |

Correction method= # Reported T Limits: Tmin=0.704 Tmax=0.753  
AbsCorr = MULTI-SCAN

Data completeness= 0.991      Theta(max)= 68.200

R(reflections)= 0.0380 ( 5571)      wR2(reflections)=  
S = 1.031      Npar= 423      0.0961 ( 6072)

## Crystal Structure of cis-6ad

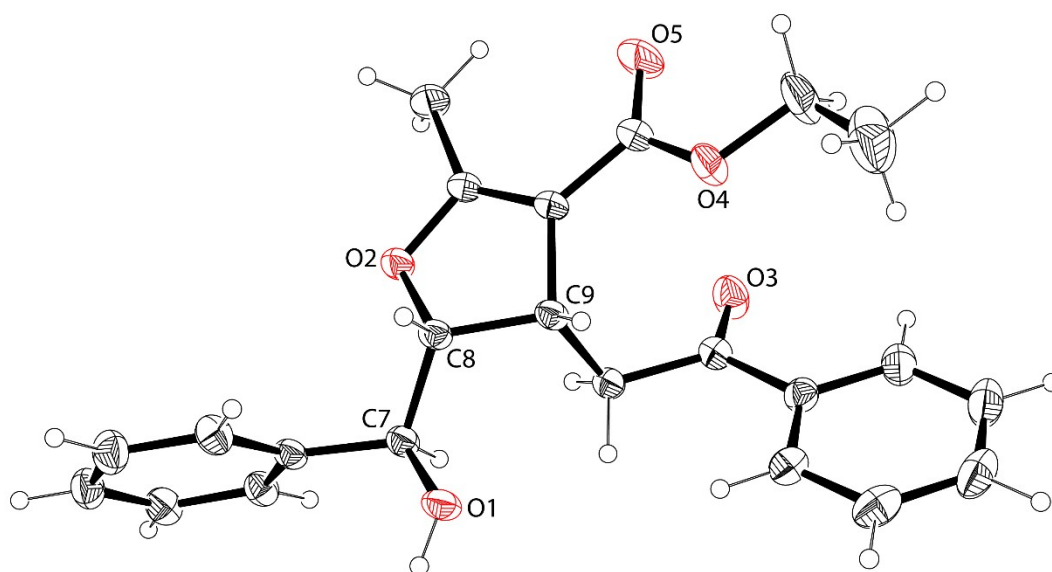

Bond precision: C-C = 0.0027 Å

Wavelength=1.54178

Cell: a=9.2814(3) b=10.4848(3) c=11.7654(3)  
 alpha=64.177(1) beta=78.373(1) gamma=76.259(1)  
 Temperature: 173 K

|                        | Calculated                                     | Reported                                       |
|------------------------|------------------------------------------------|------------------------------------------------|
| Volume                 | 994.79(5)                                      | 994.79(5)                                      |
| Space group            | P -1                                           | P -1                                           |
| Hall group             | -P 1                                           | -P 1                                           |
| Moiety formula         | C <sub>23</sub> H <sub>24</sub> O <sub>5</sub> | C <sub>23</sub> H <sub>24</sub> O <sub>5</sub> |
| Sum formula            | C <sub>23</sub> H <sub>24</sub> O <sub>5</sub> | C <sub>23</sub> H <sub>24</sub> O <sub>5</sub> |
| Mr                     | 380.42                                         | 380.42                                         |
| Dx, g cm <sup>-3</sup> | 1.270                                          | 1.270                                          |
| Z                      | 2                                              | 2                                              |
| Mu (mm <sup>-1</sup> ) | 0.724                                          | 0.724                                          |
| F000                   | 404.0                                          | 404.0                                          |
| F000'                  | 405.28                                         |                                                |
| h, k, lmax             | 11, 12, 14                                     | 11, 12, 14                                     |
| Nref                   | 3640                                           | 3608                                           |
| Tmin, Tmax             | 0.885, 0.910                                   | 0.673, 0.753                                   |
| Tmin'                  | 0.859                                          |                                                |

Correction method= # Reported T Limits: Tmin=0.673 Tmax=0.753  
 AbsCorr = MULTI-SCAN

Data completeness= 0.991

Theta(max)= 68.265

R(reflections)= 0.0460( 3150)

wR2(reflections)=  
0.1252( 3608)

S = 1.052

Npar= 256

### Crystal Structure of 8ba<sub>2</sub>

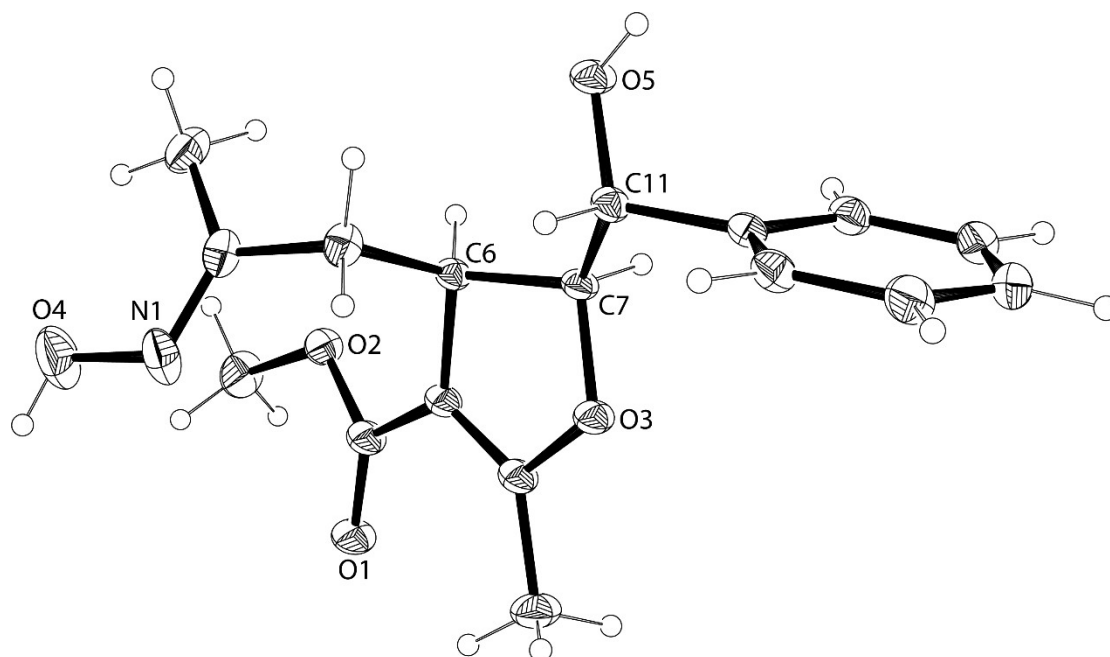

Bond precision: C-C = 0.0035 Å

Wavelength=1.54178

Cell: a=9.2667 (3) b=9.3632 (3) c=10.5150 (3)  
 alpha=99.574 (1) beta=114.052 (1) gamma=97.069 (1)  
 Temperature: 173 K

|                        | Calculated   | Reported     |
|------------------------|--------------|--------------|
| Volume                 | 802.86 (4)   | 802.86 (4)   |
| Space group            | P -1         | P -1         |
| Hall group             | -P 1         | -P 1         |
| Moiety formula         | C17 H21 N O5 | C17 H21 N O5 |
| Sum formula            | C17 H21 N O5 | C17 H21 N O5 |
| Mr                     | 319.35       | 319.35       |
| Dx, g cm <sup>-3</sup> | 1.321        | 1.321        |
| Z                      | 2            | 2            |
| Mu (mm <sup>-1</sup> ) | 0.806        | 0.806        |
| F000                   | 340.0        | 340.0        |
| F000'                  | 341.12       |              |
| h, k, lmax             | 11, 11, 12   | 11, 11, 12   |
| Nref                   | 3162         | 3124         |
| Tmin, Tmax             | 0.886, 0.908 | 0.688, 0.754 |
| Tmin'                  | 0.886        |              |

Correction method= # Reported T Limits: Tmin=0.688 Tmax=0.754  
 AbsCorr = MULTI-SCAN

Data completeness= 0.988

Theta(max)= 72.044

R(reflections)= 0.0597 ( 2754)

wR2(reflections)=  
0.1608 ( 3124)

S = 1.079

Npar= 242

## 7. <sup>1</sup>H and <sup>13</sup>C NMR Spectrogram

### <sup>1</sup>H and <sup>13</sup>C NMR Spectra for 1a

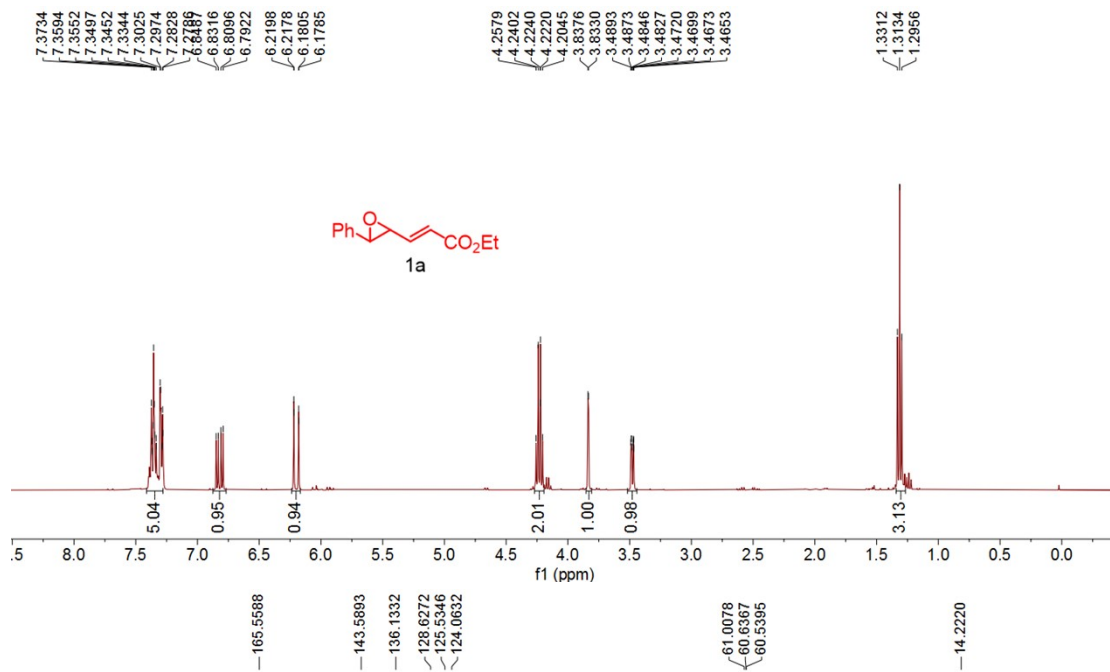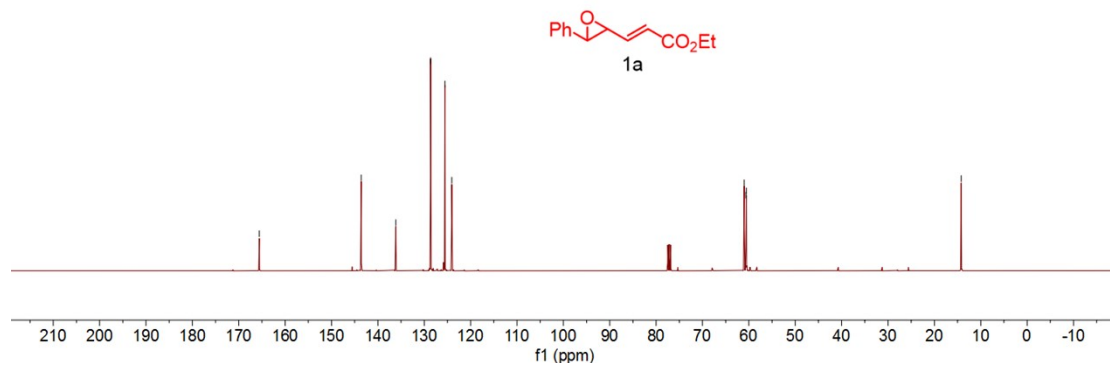

# <sup>1</sup>H and <sup>13</sup>C NMR Spectra for 1b

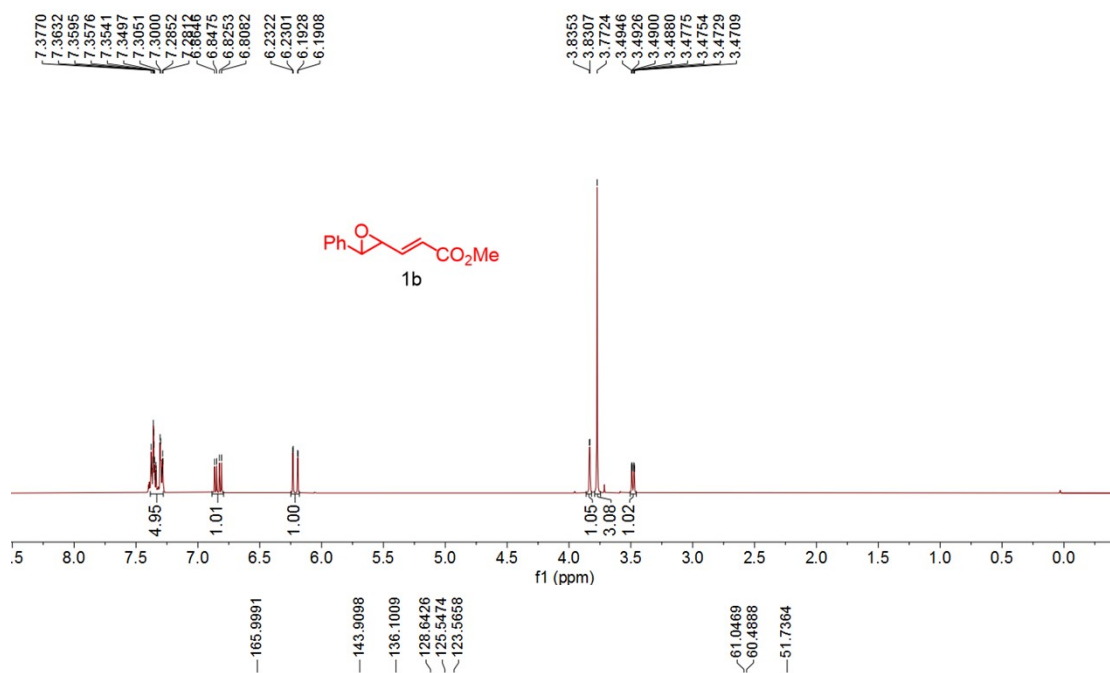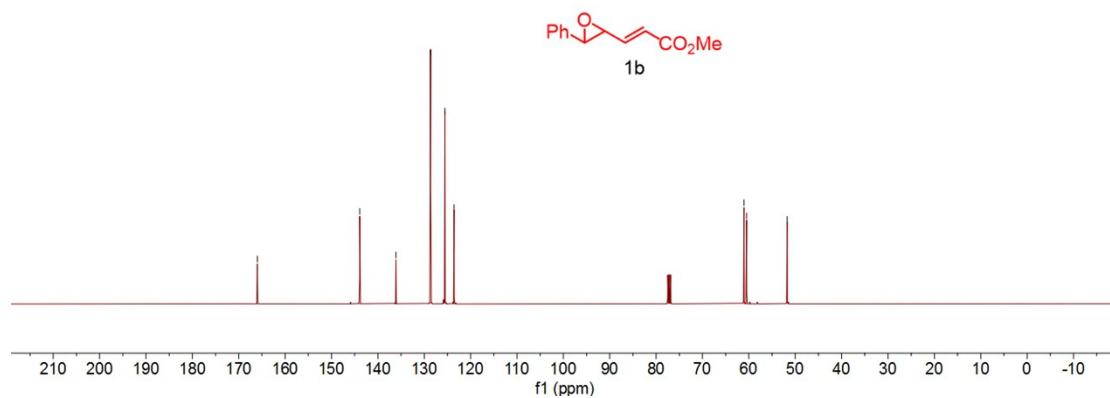

# <sup>1</sup>H and <sup>13</sup>C NMR Spectra for 1c

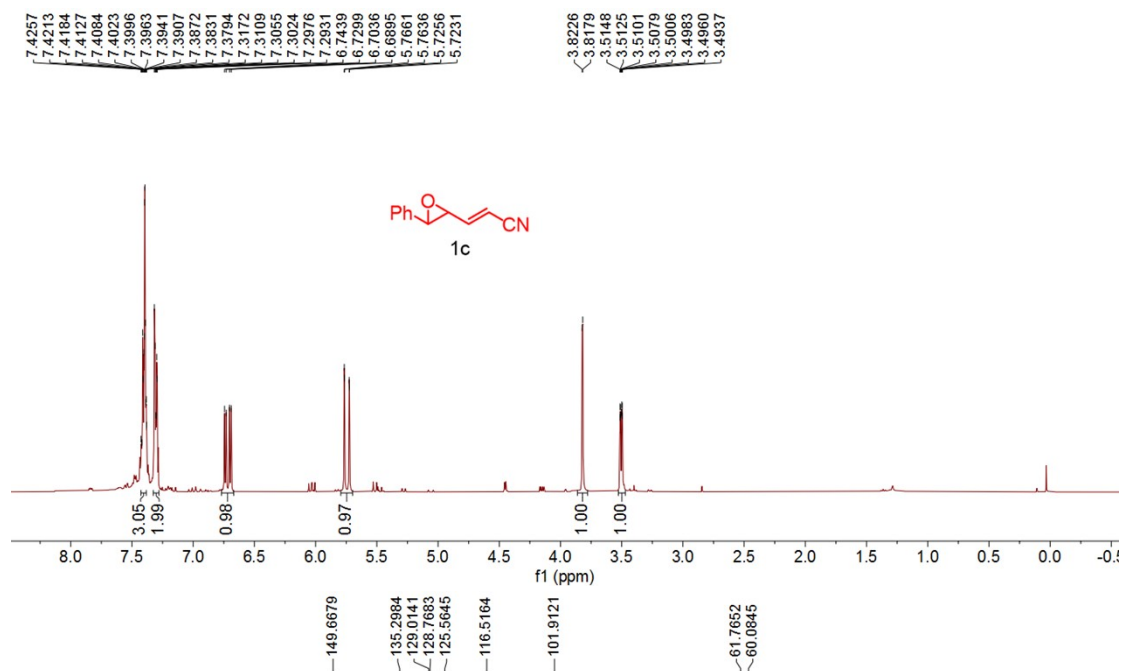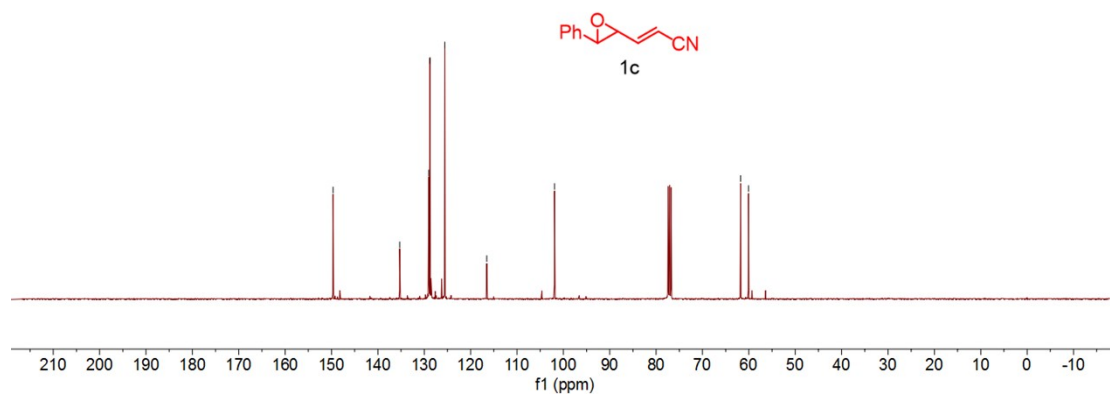

**<sup>1</sup>H and <sup>13</sup>C NMR Spectra for 1d**

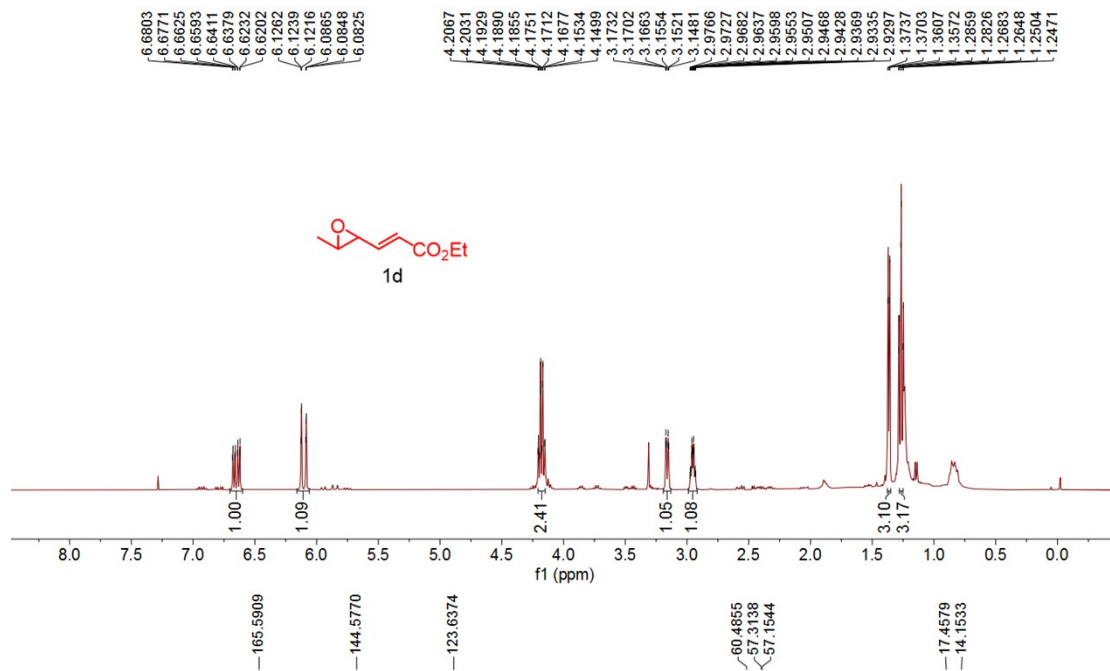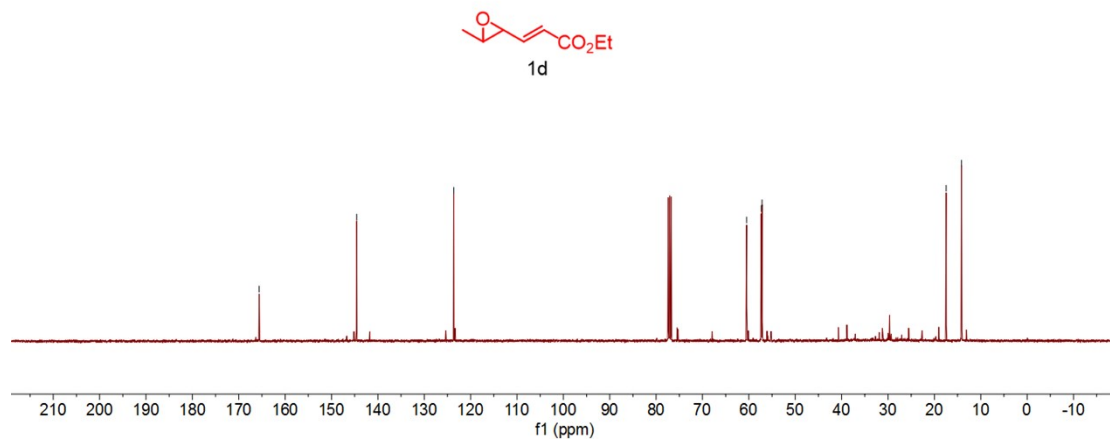

# <sup>1</sup>H and <sup>13</sup>C NMR Spectra for 1e

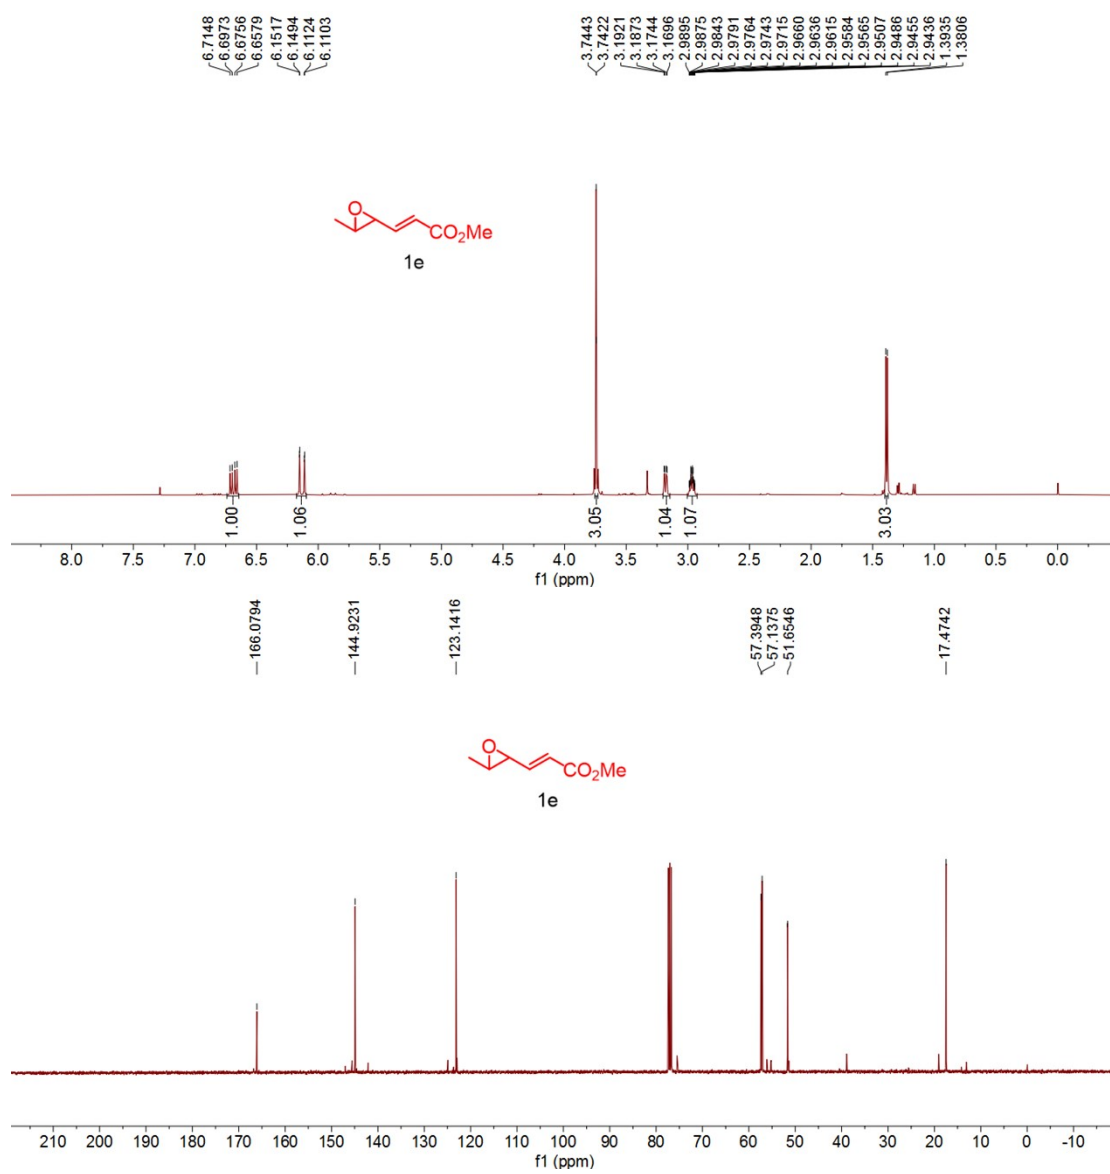



# <sup>1</sup>H and <sup>13</sup>C NMR Spectra for 6aa

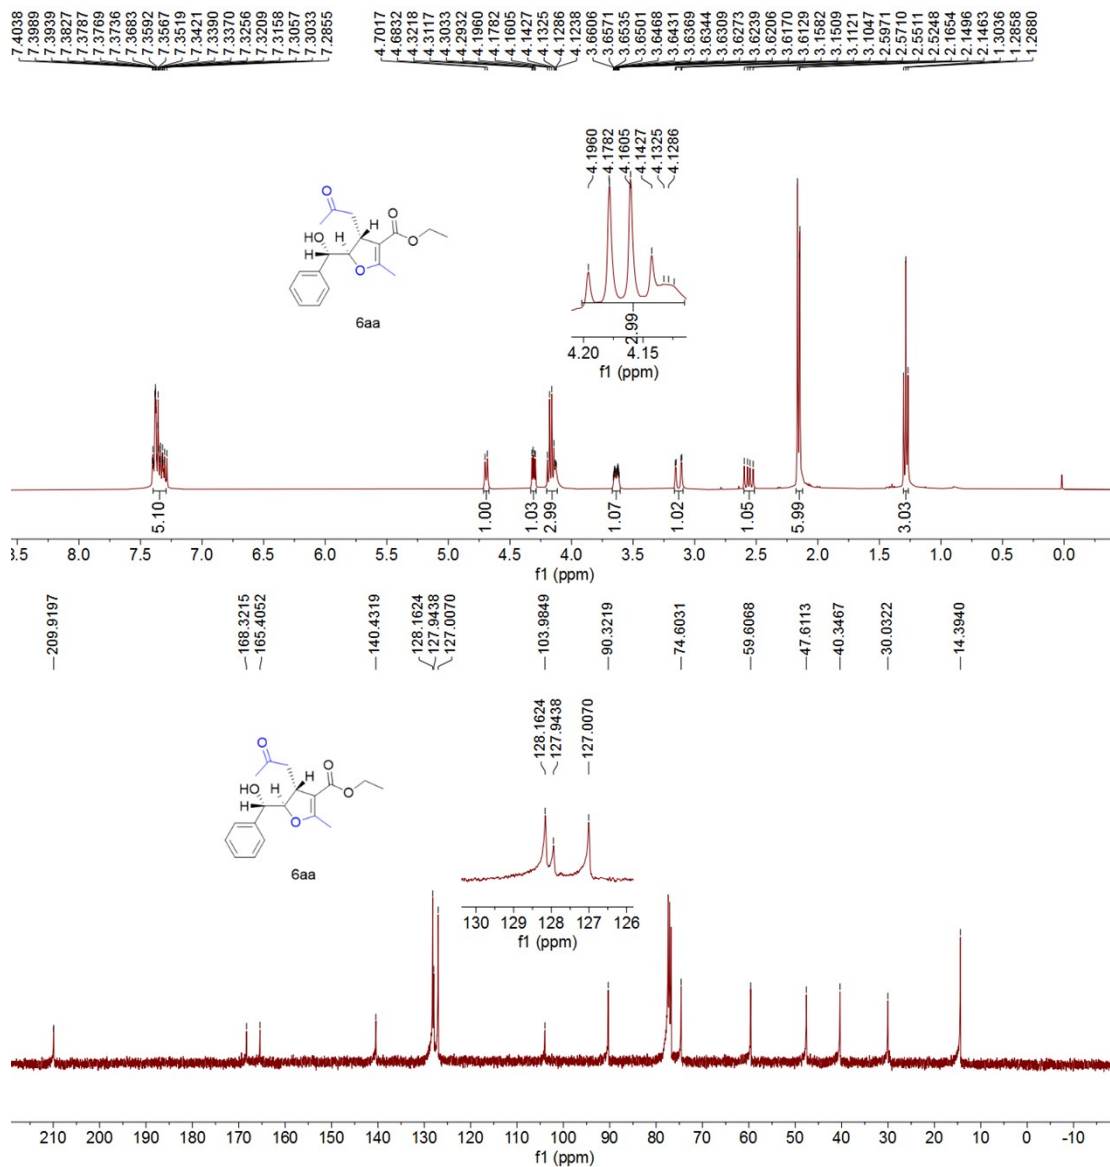

# <sup>1</sup>H and <sup>13</sup>C NMR Spectra for 6ba

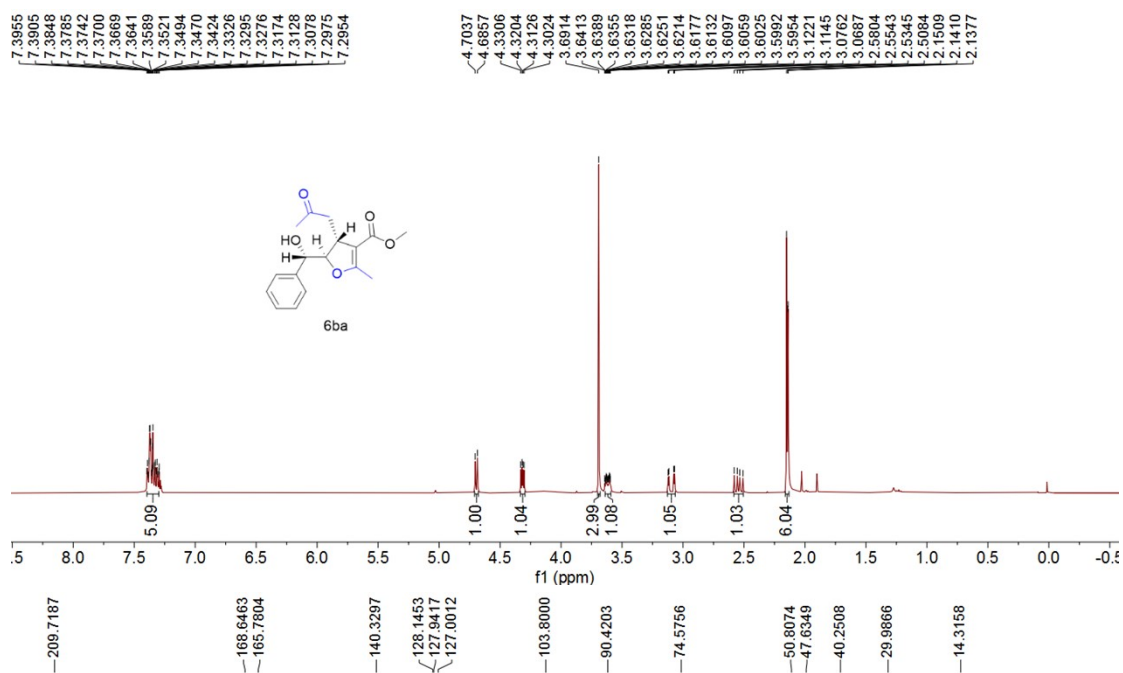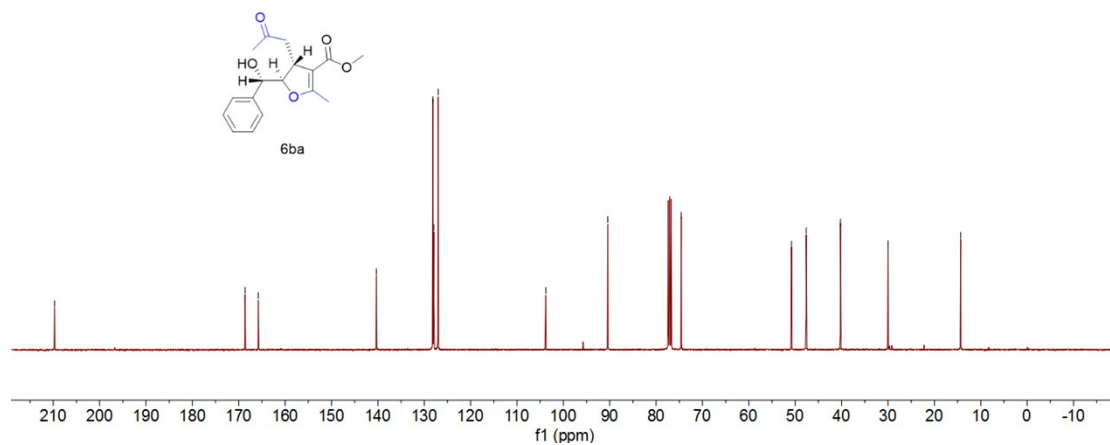

# <sup>1</sup>H and <sup>13</sup>C NMR Spectra for 6da

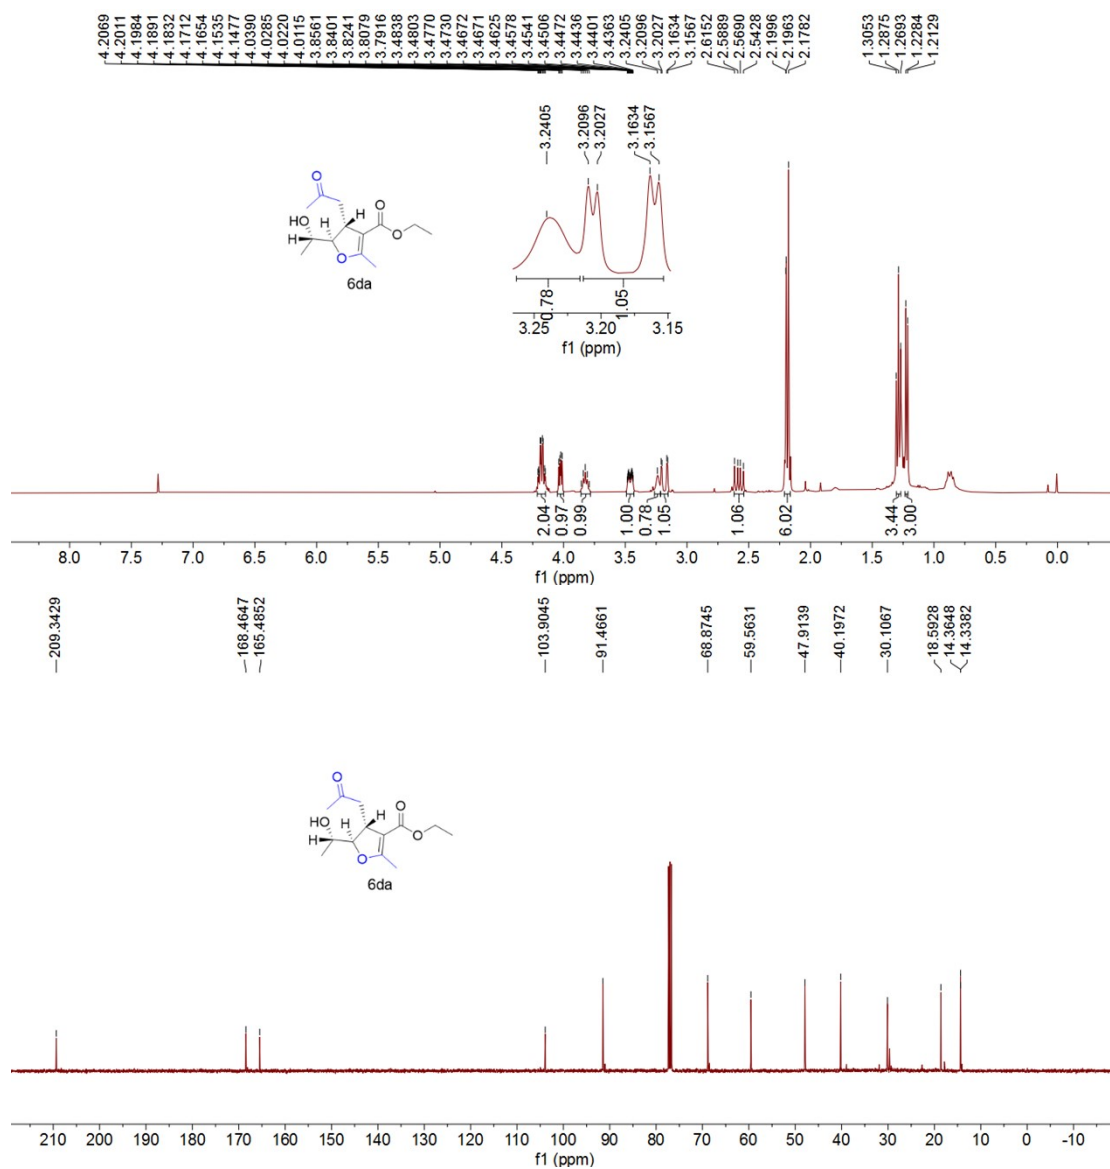

**<sup>1</sup>H and <sup>13</sup>C NMR Spectra for 6ea**

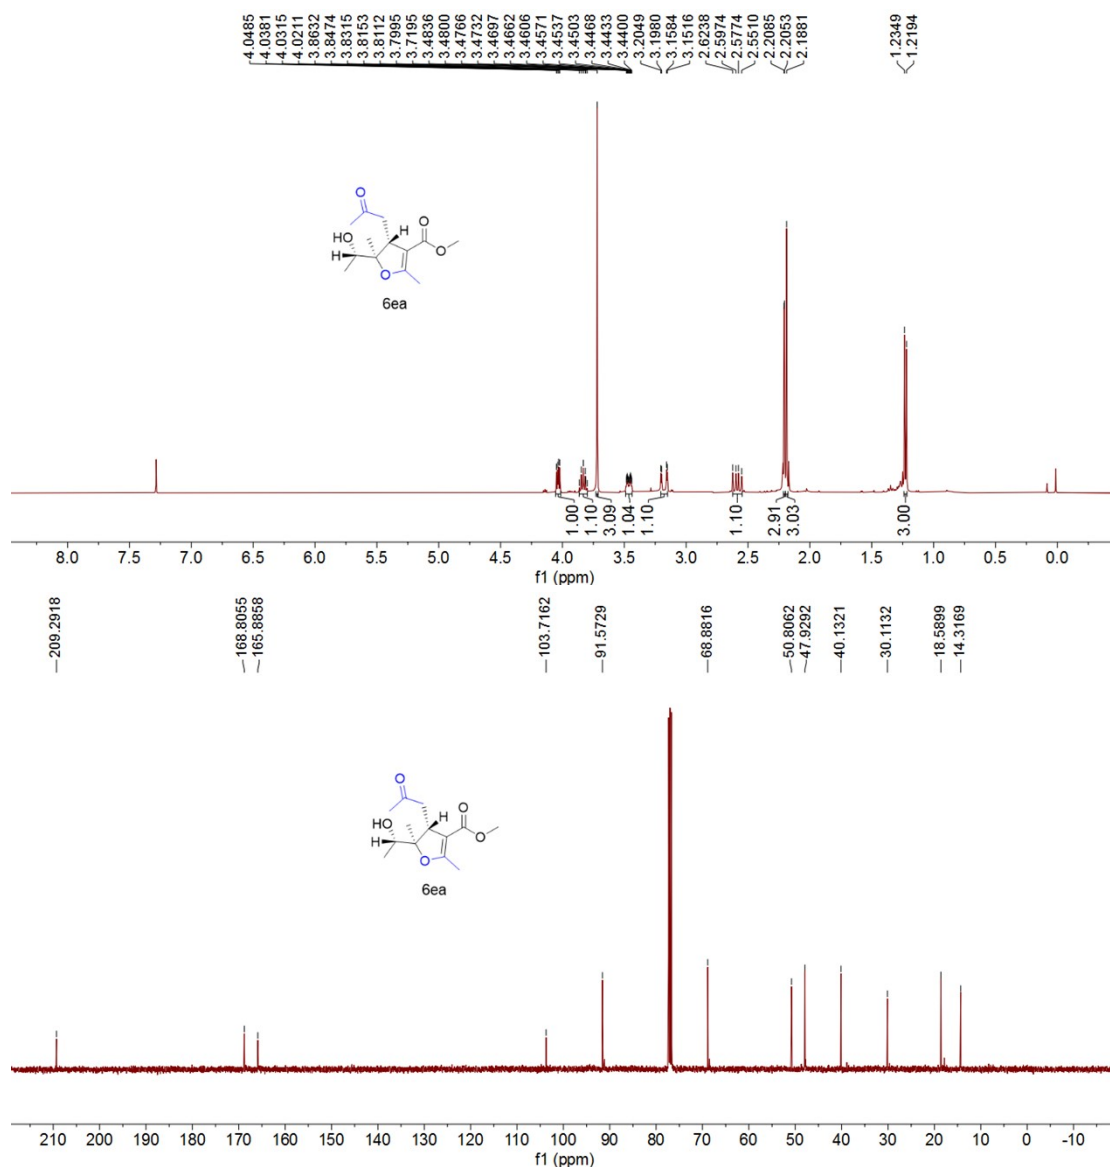

# <sup>1</sup>H and <sup>13</sup>C NMR Spectra for 6ab

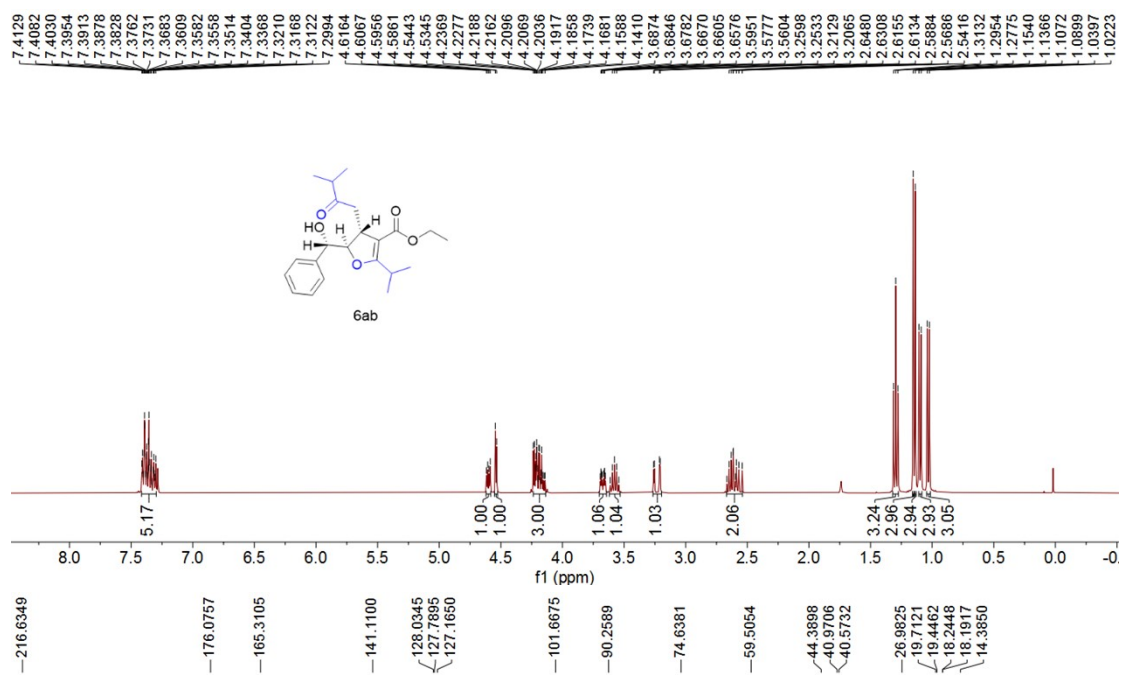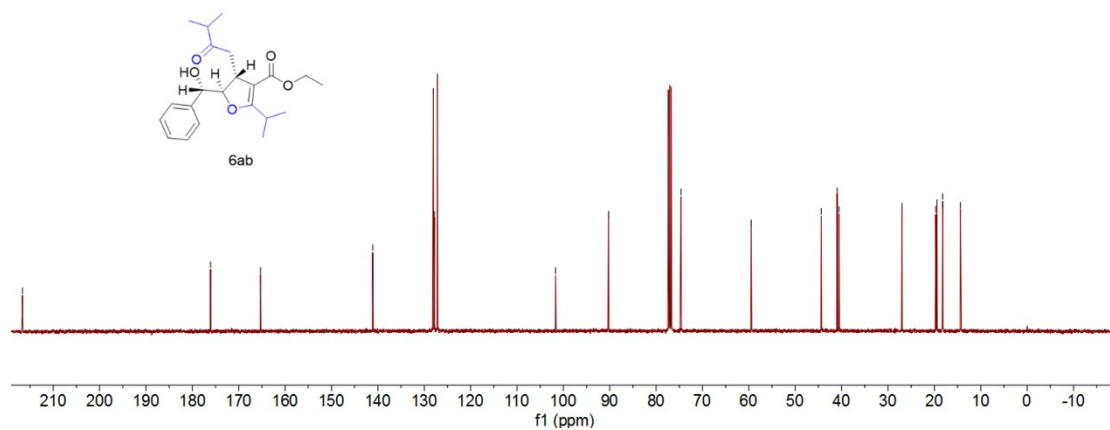

**<sup>1</sup>H and <sup>13</sup>C NMR Spectra for 6bb**

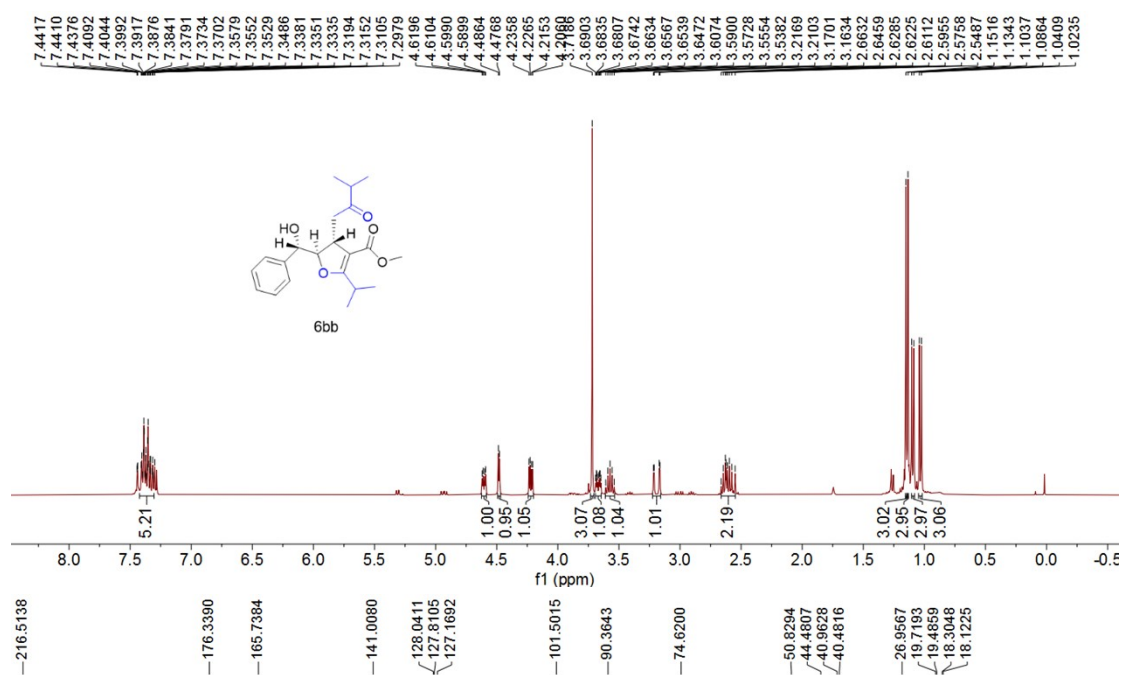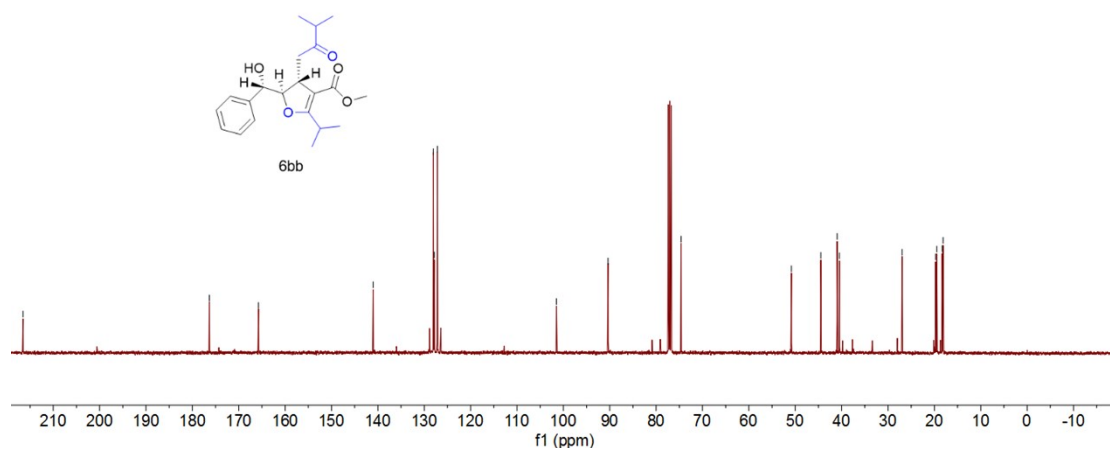

# <sup>1</sup>H and <sup>13</sup>C NMR Spectra for 6cb

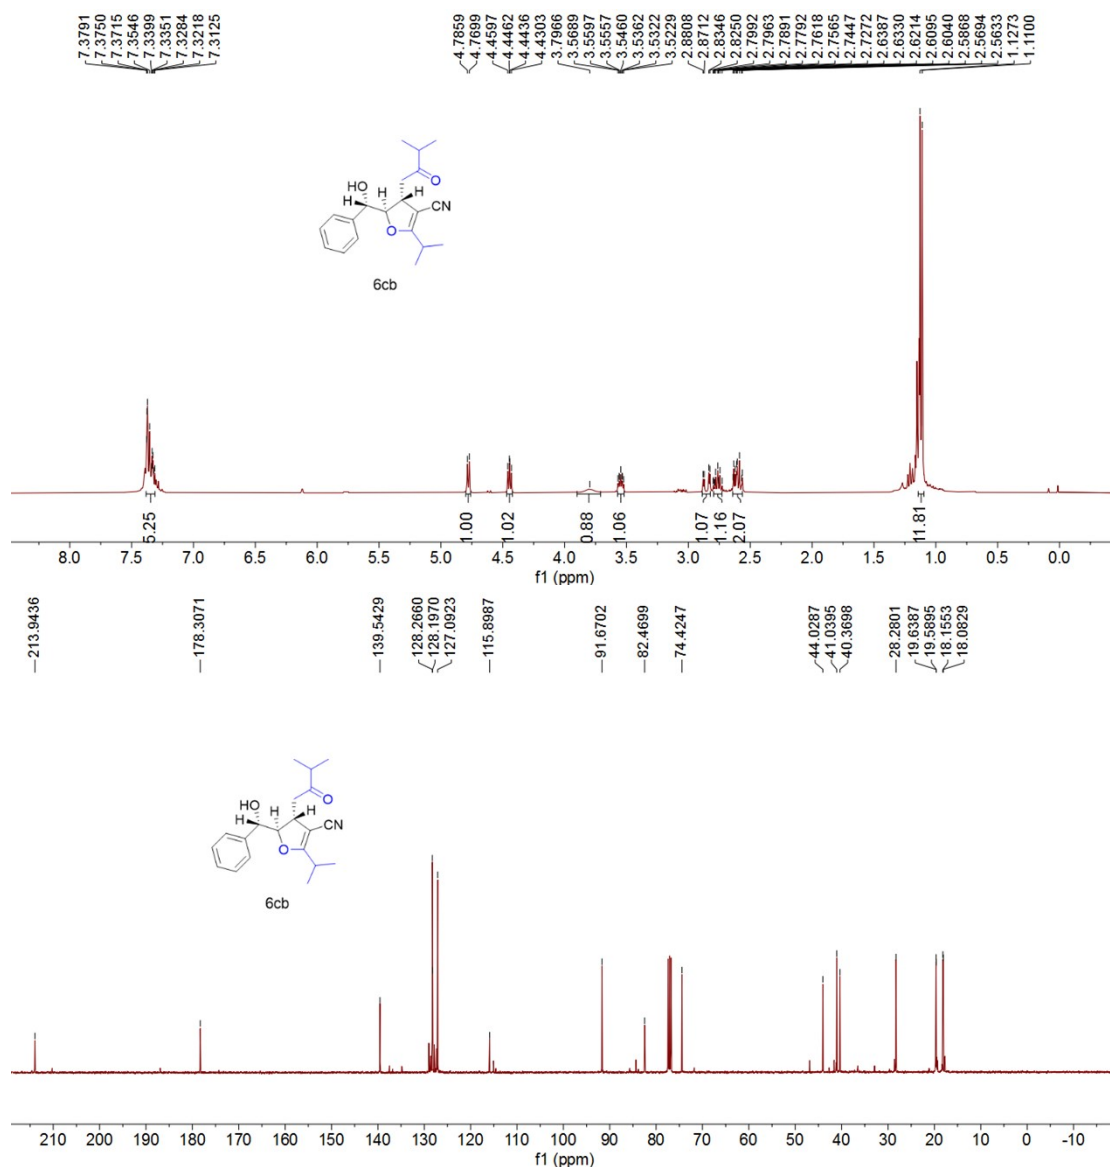

# <sup>1</sup>H and <sup>13</sup>C NMR Spectra for 6db

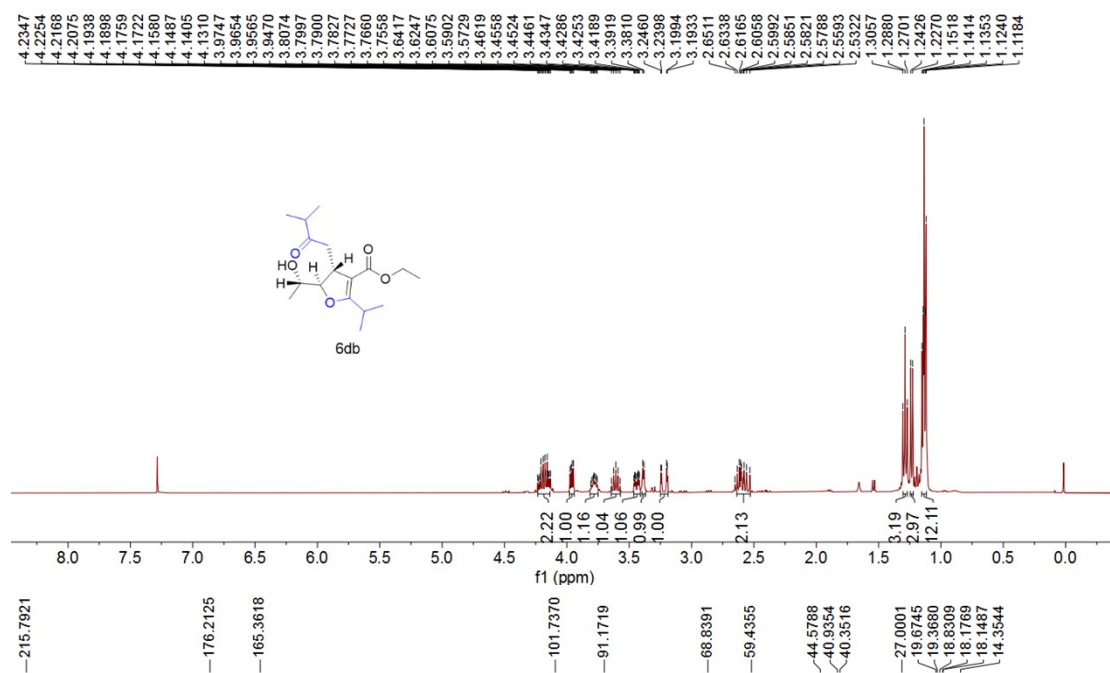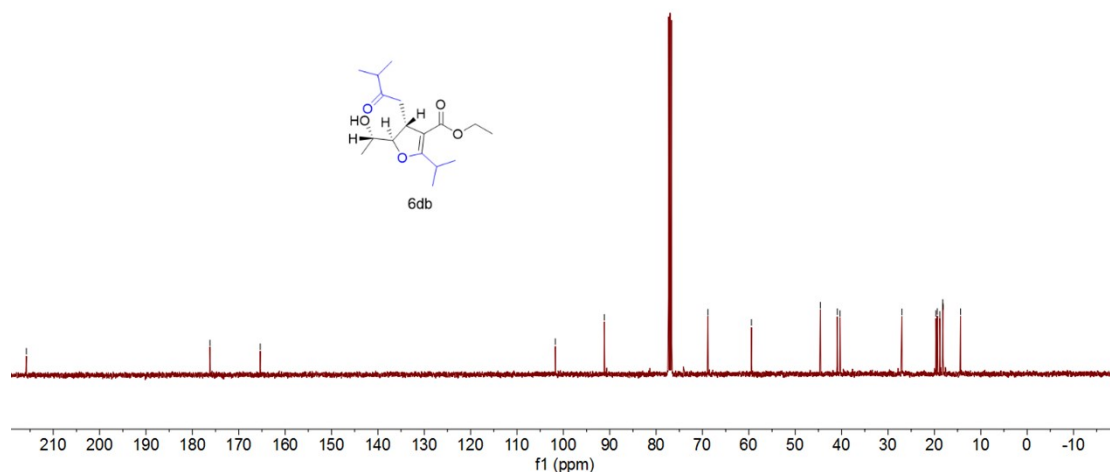



**<sup>1</sup>H and <sup>13</sup>C NMR Spectra for 6eb**

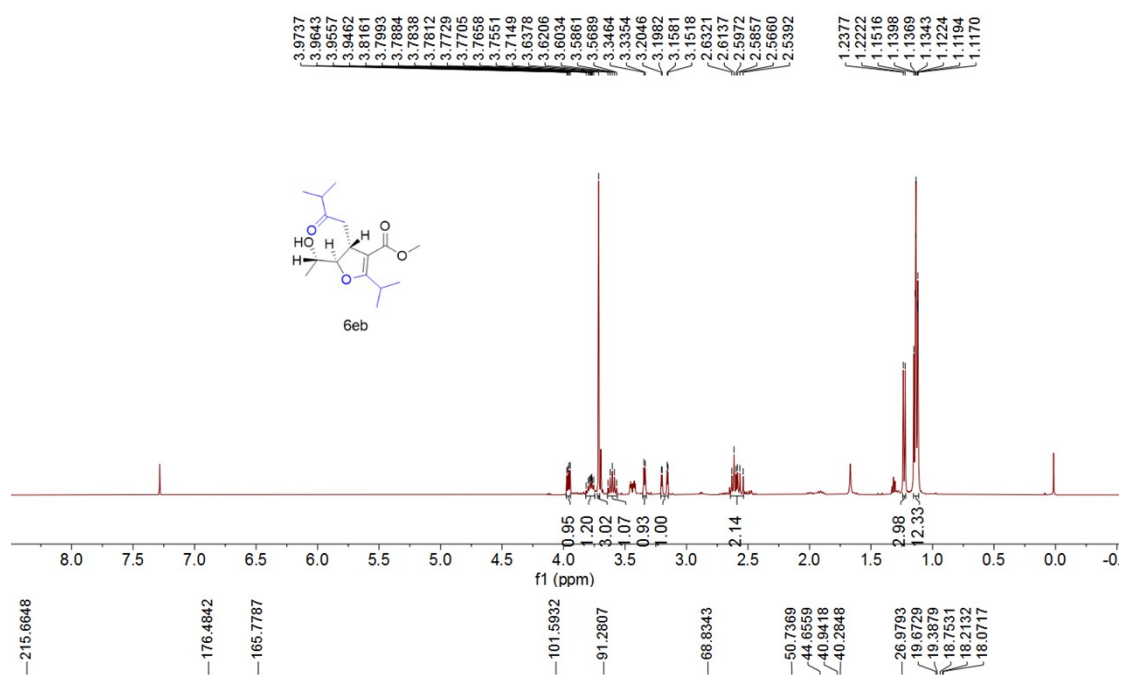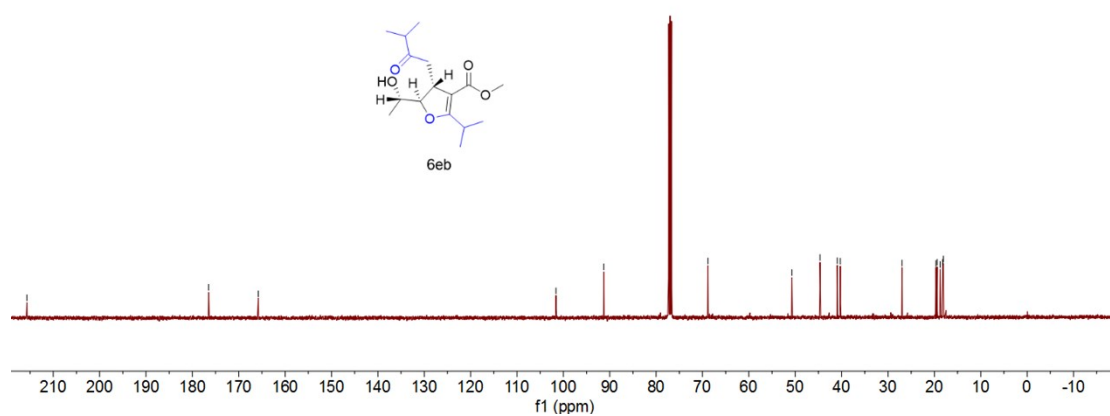

# <sup>1</sup>H and <sup>13</sup>C NMR Spectra for 6ac

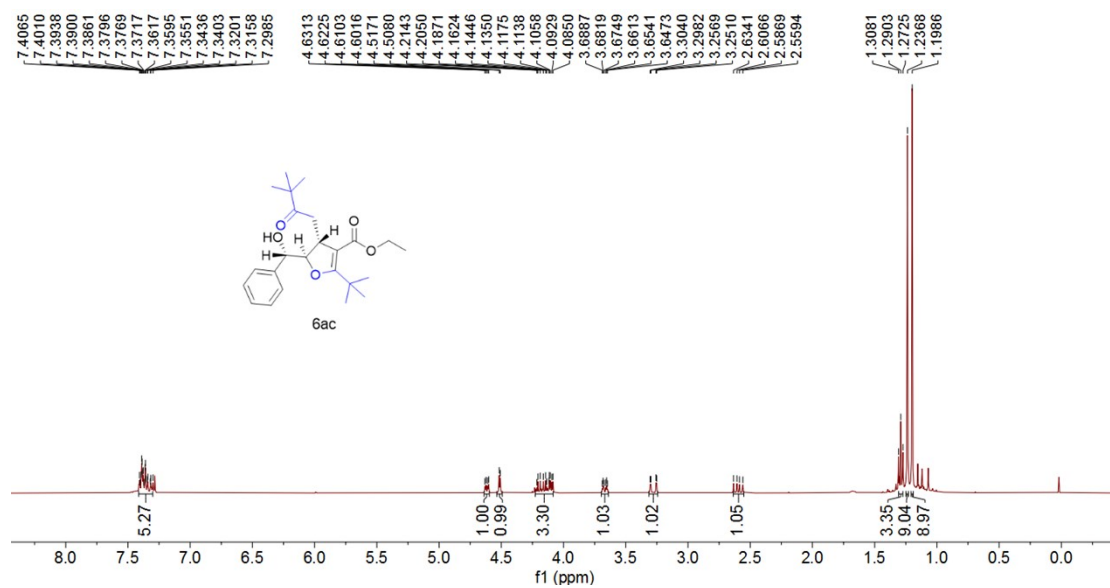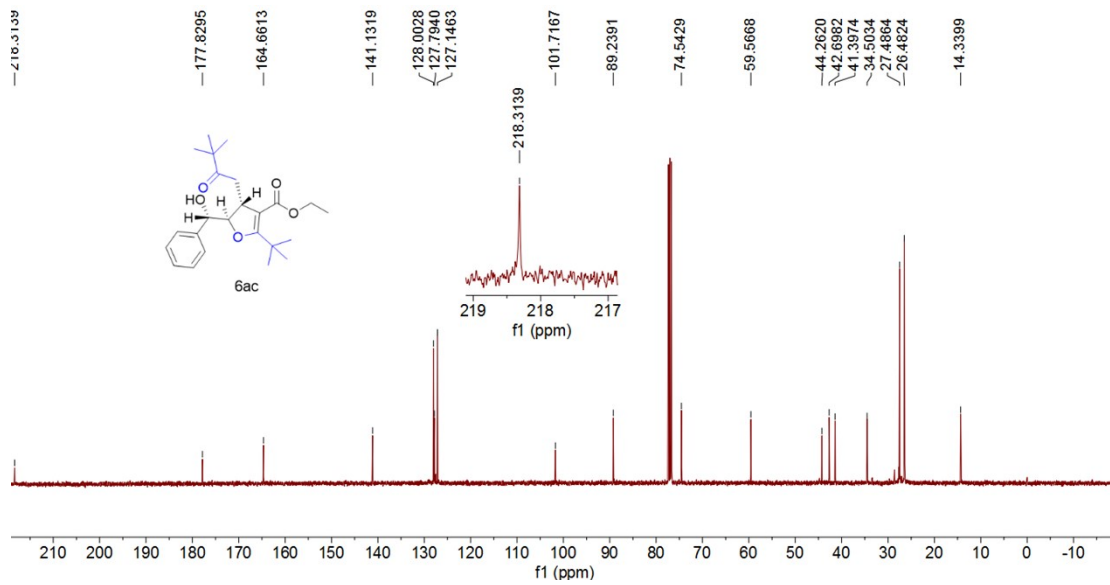

**<sup>1</sup>H and <sup>13</sup>C NMR Spectra for 6bc**

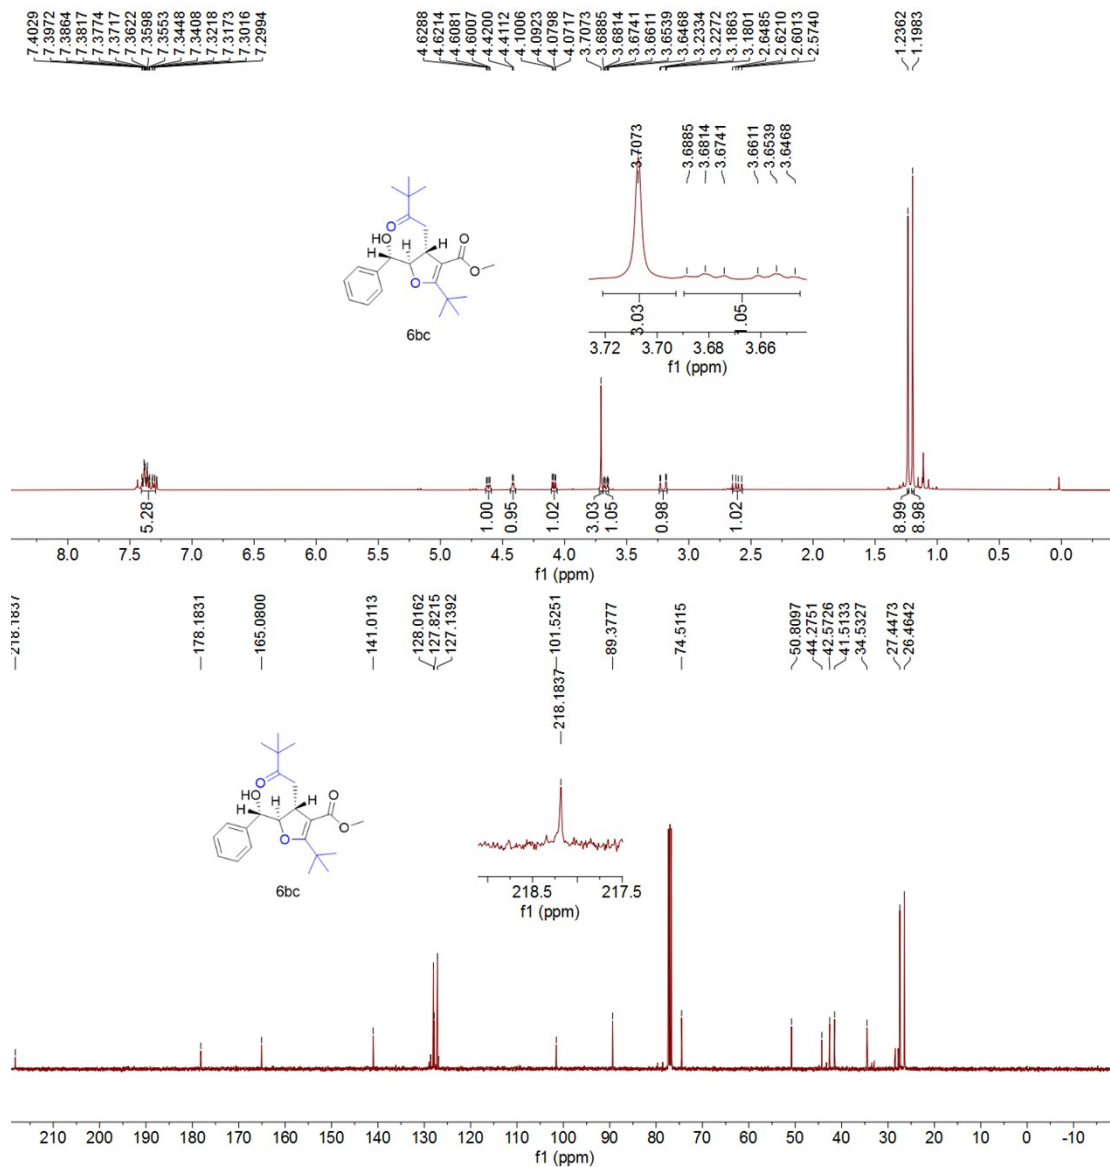

**<sup>1</sup>H and <sup>13</sup>C NMR Spectra for 6cc**

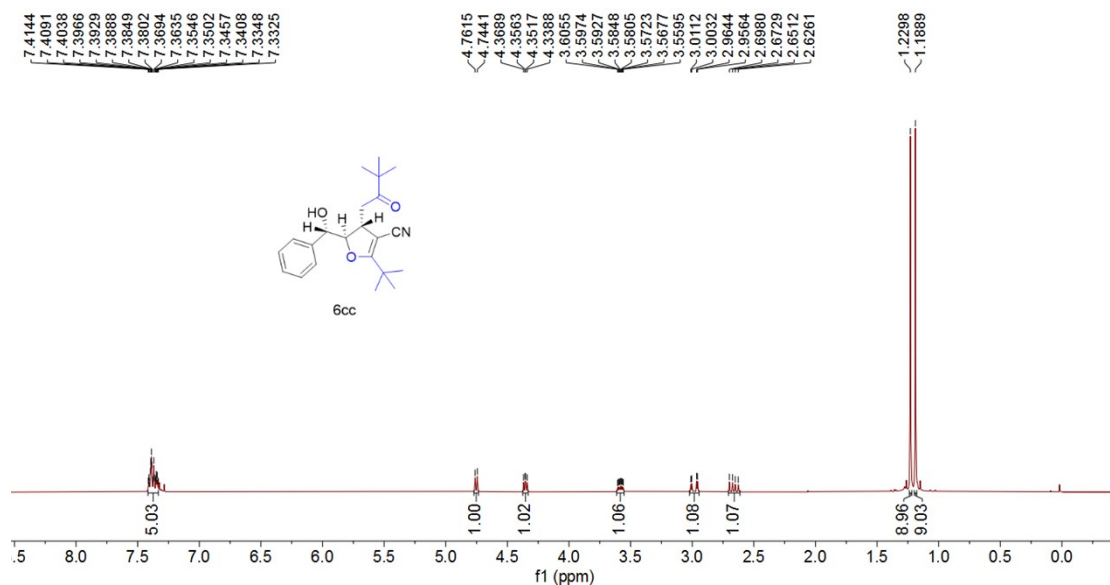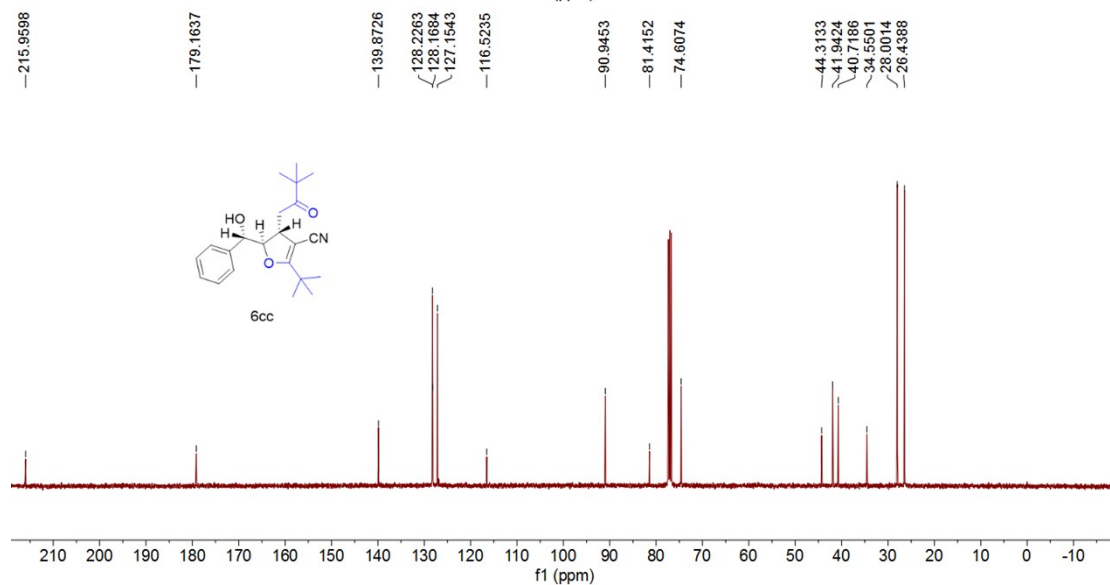

# <sup>1</sup>H and <sup>13</sup>C NMR Spectra for 6dc

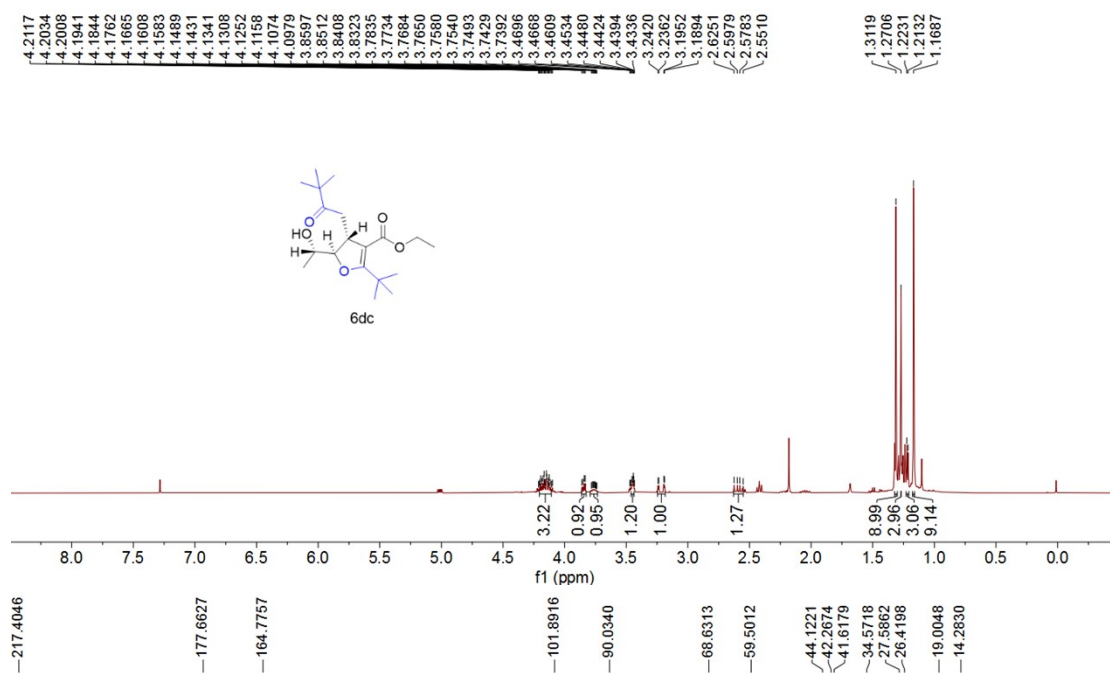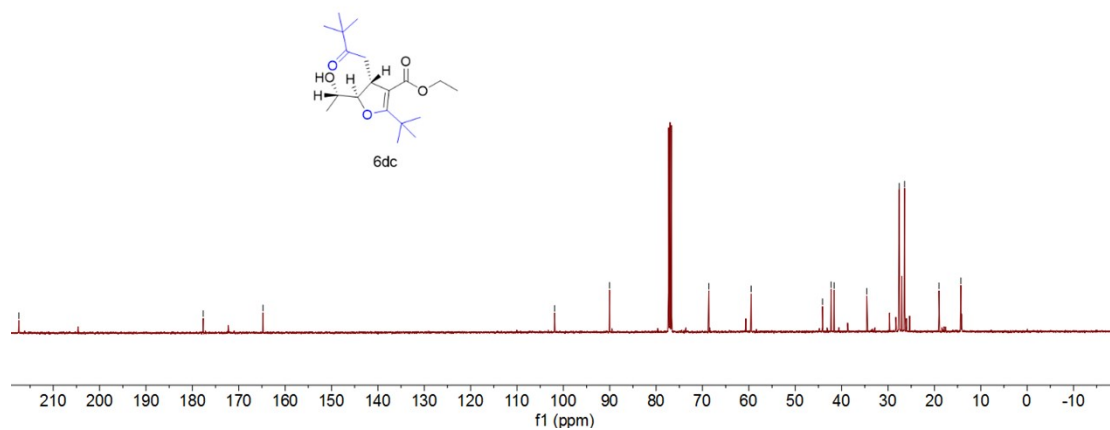

**<sup>1</sup>H and <sup>13</sup>C NMR Spectra for 6ec**

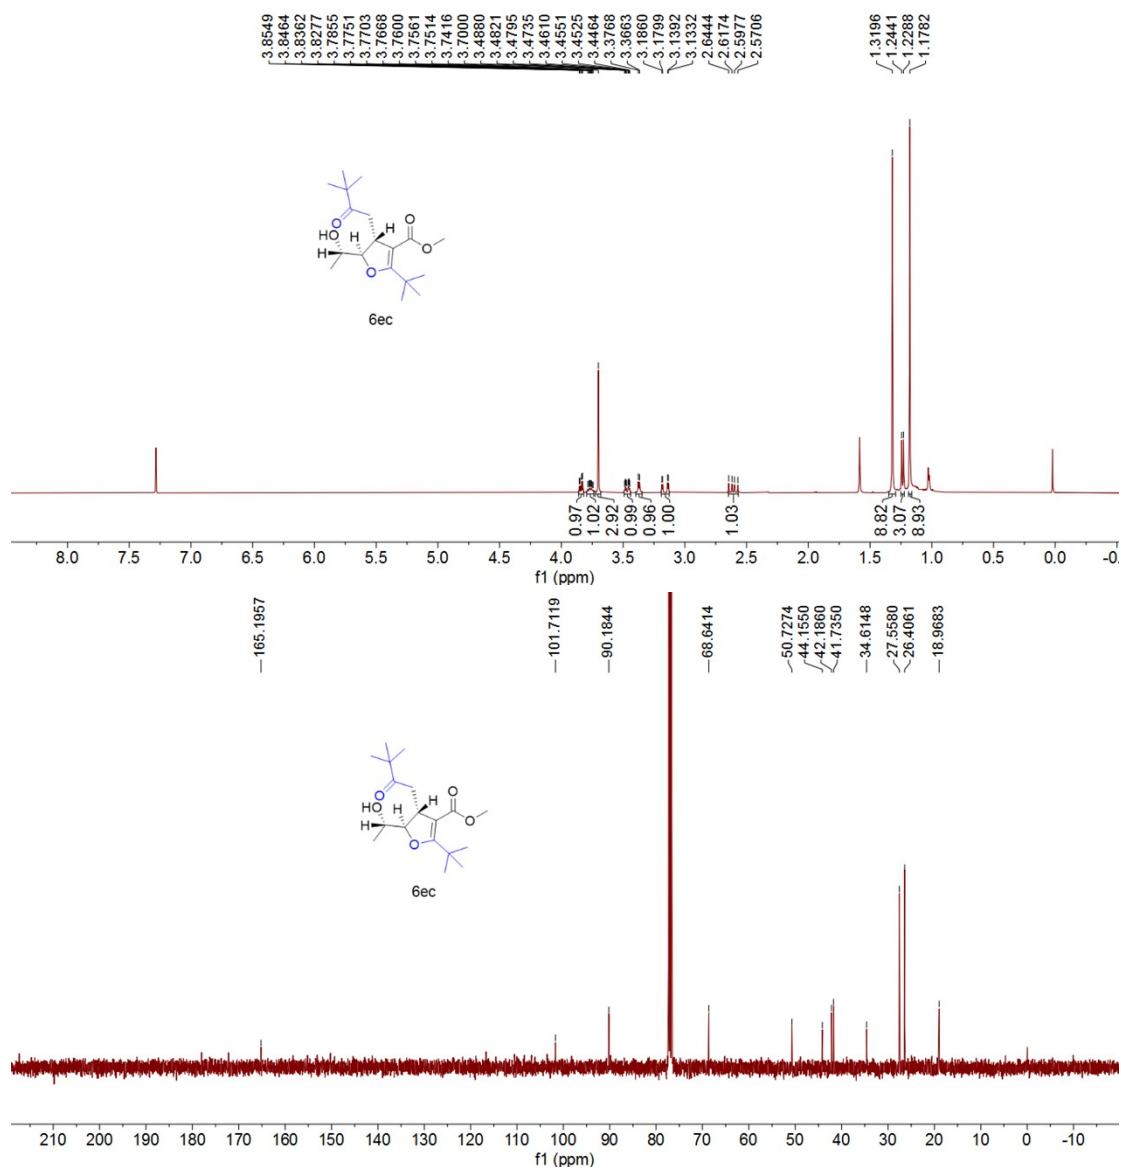

# <sup>1</sup>H and <sup>13</sup>C NMR Spectra for 6ad

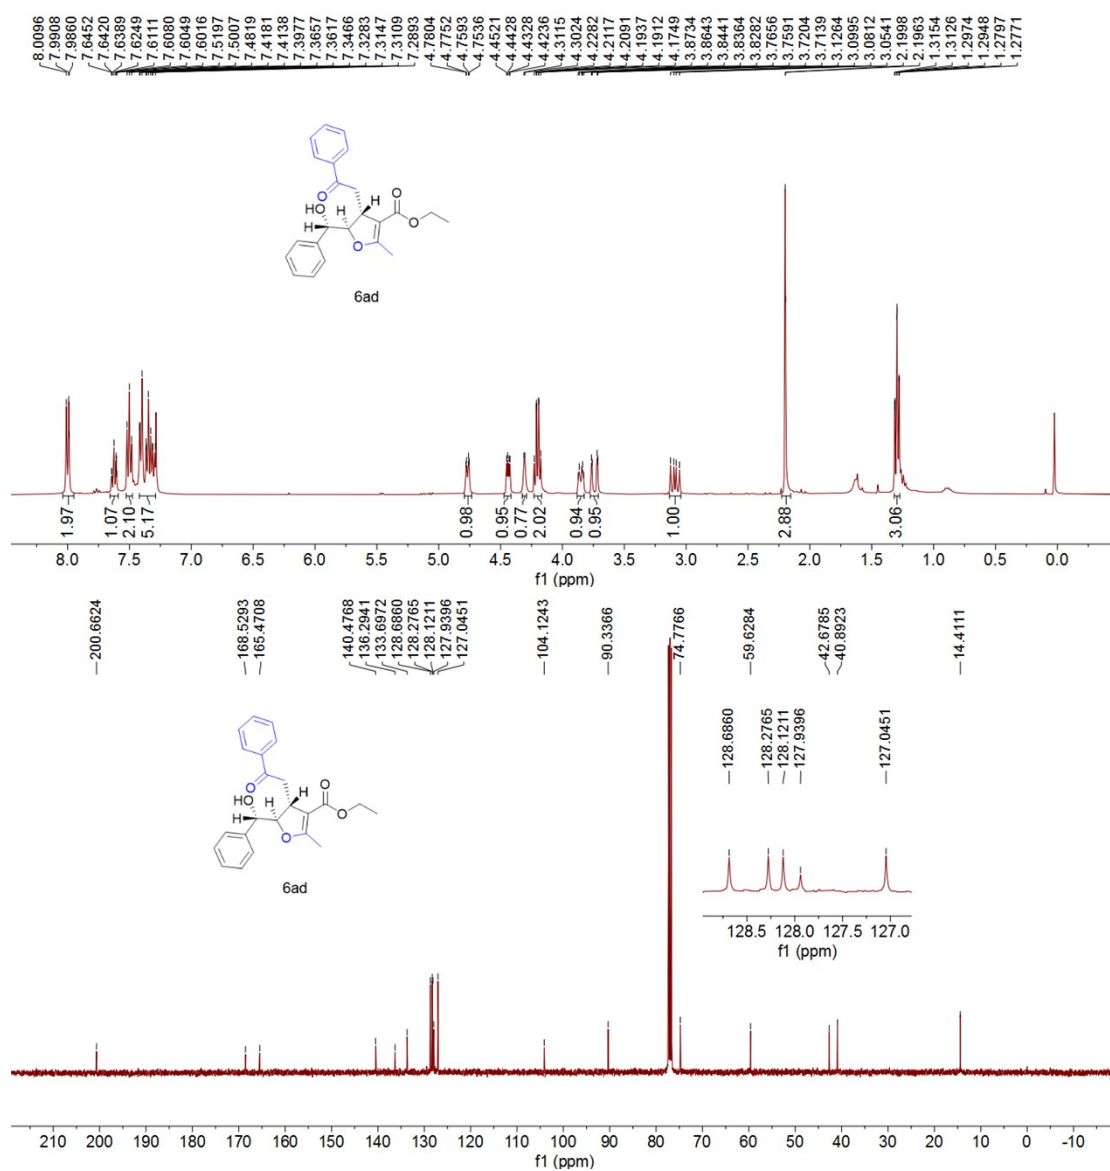

**<sup>1</sup>H and <sup>13</sup>C NMR Spectra for 6bd**

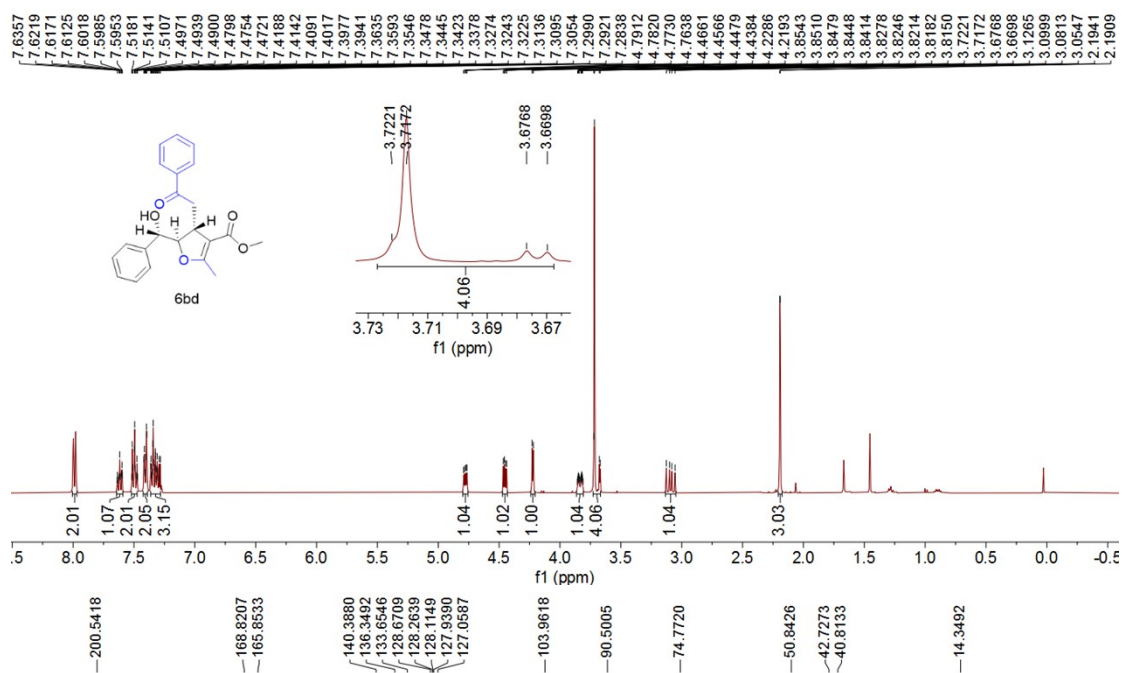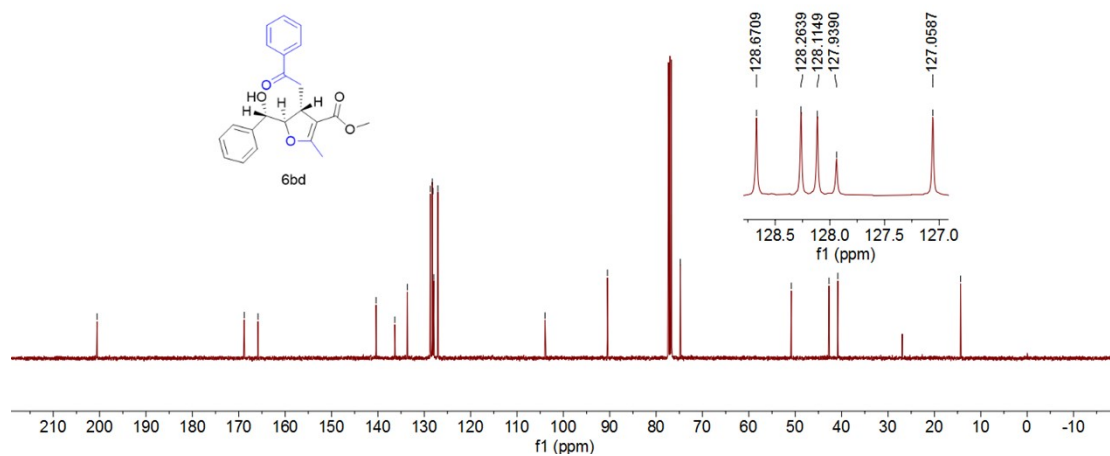



**<sup>1</sup>H and <sup>13</sup>C NMR Spectra for 6dd**

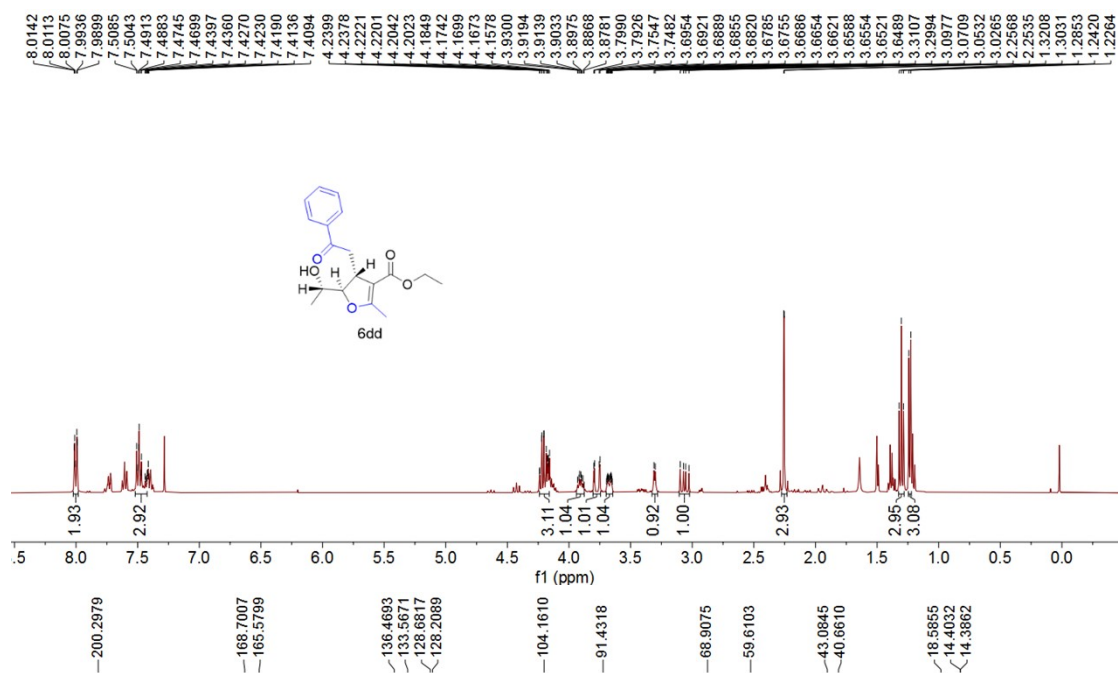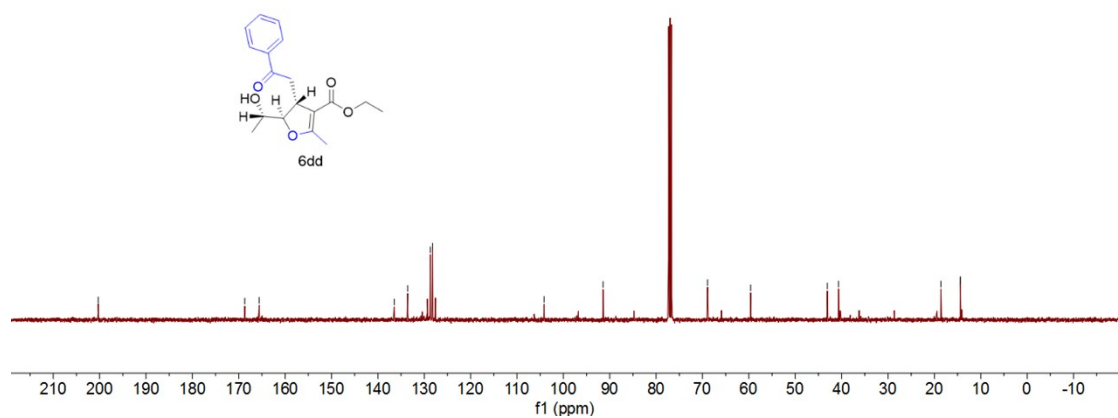

**<sup>1</sup>H and <sup>13</sup>C NMR Spectra for 6ed**

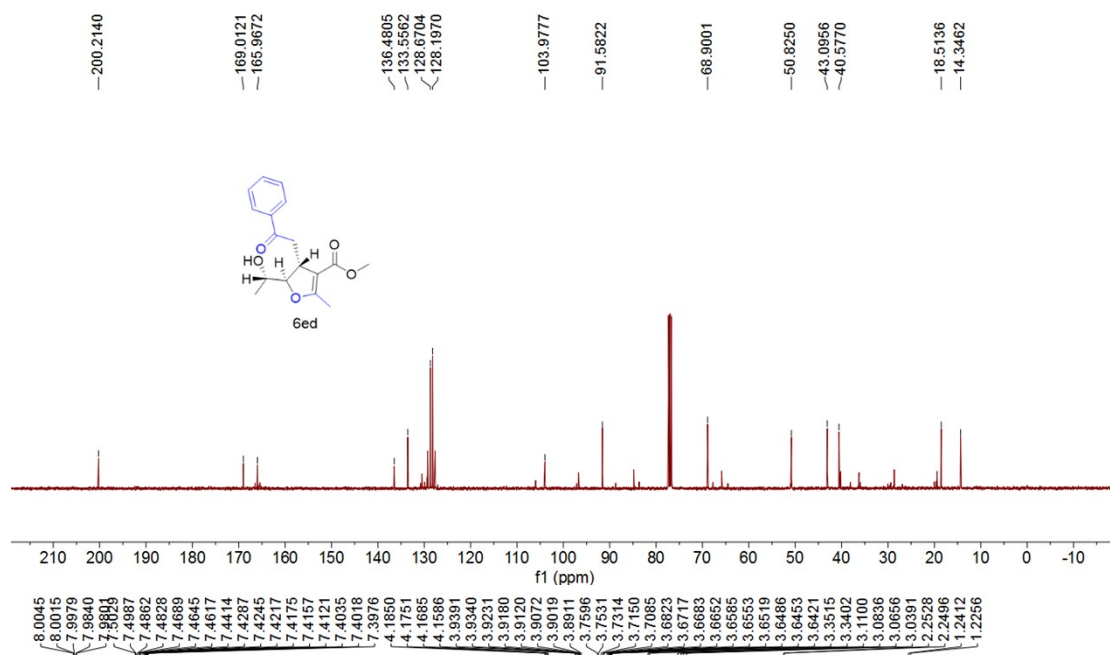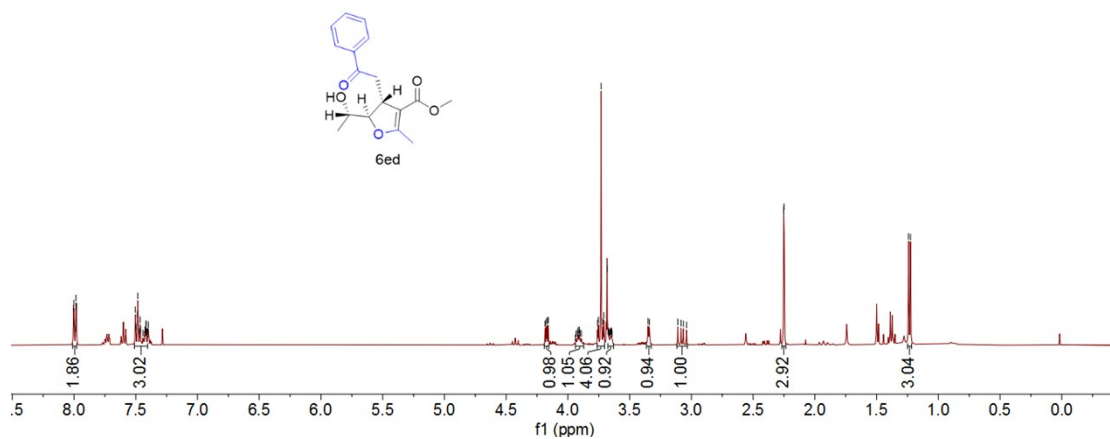

**<sup>1</sup>H and <sup>13</sup>C NMR Spectra for 6ae<sub>1</sub>**

7.4022  
7.3973  
7.3928  
7.3854  
7.3812  
7.3770  
7.3735  
7.3707  
7.3653  
7.3564  
7.3537  
7.3487  
7.3387  
7.3346  
7.3219  
7.3173  
7.3124  
7.3002  
4.6644  
4.6552  
4.6448  
4.6394  
4.4510  
4.4415  
4.3047  
4.2952  
4.2851  
4.2754  
4.2226  
4.2049  
4.1871  
4.1695  
3.6834  
3.6566  
3.6533  
3.3480  
3.3412  
3.3016  
3.2948  
2.7796  
2.7525  
2.7331  
2.7061  
2.1586  
2.1554  
1.9582  
1.9469  
1.9356  
1.9273  
1.3223  
1.3045  
1.2866  
1.1349  
1.1314  
1.1240  
1.1189  
1.1130  
1.1076  
1.1039  
0.8798  
0.8661  
0.8652  
0.8609  
0.8487  
0.8454  
0.8421

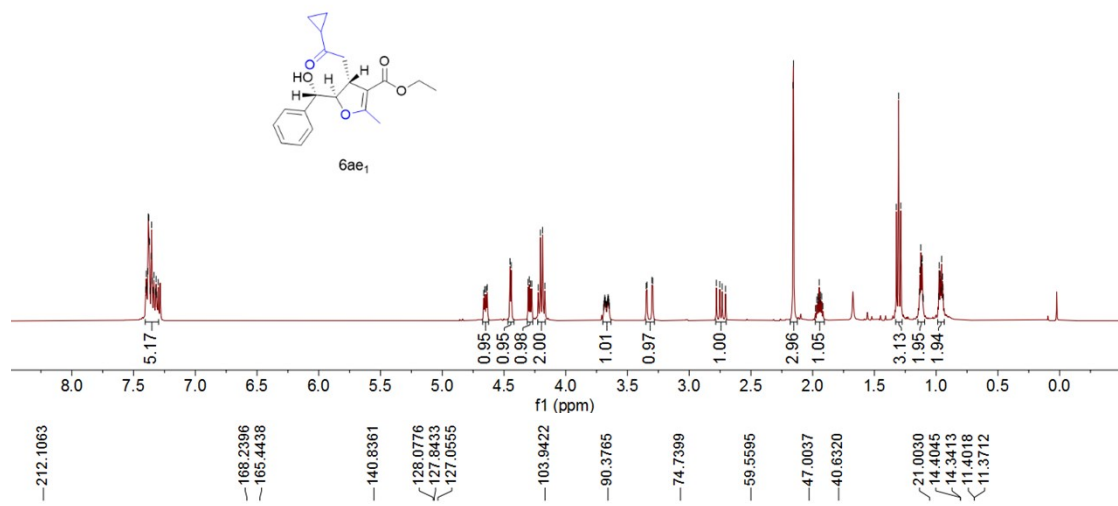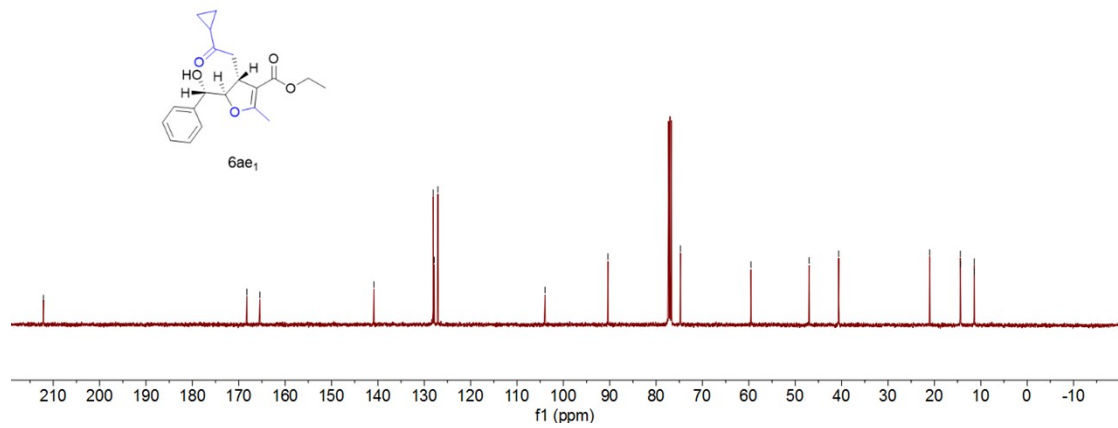

# <sup>1</sup>H and <sup>13</sup>C NMR Spectra for 6ae<sub>2</sub>

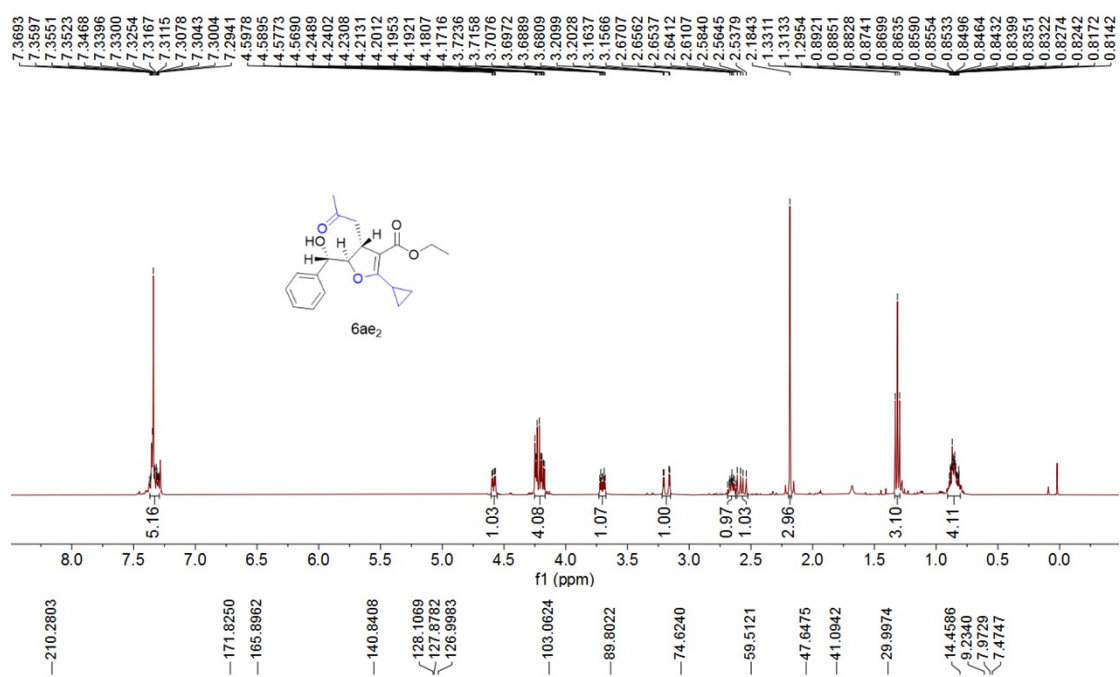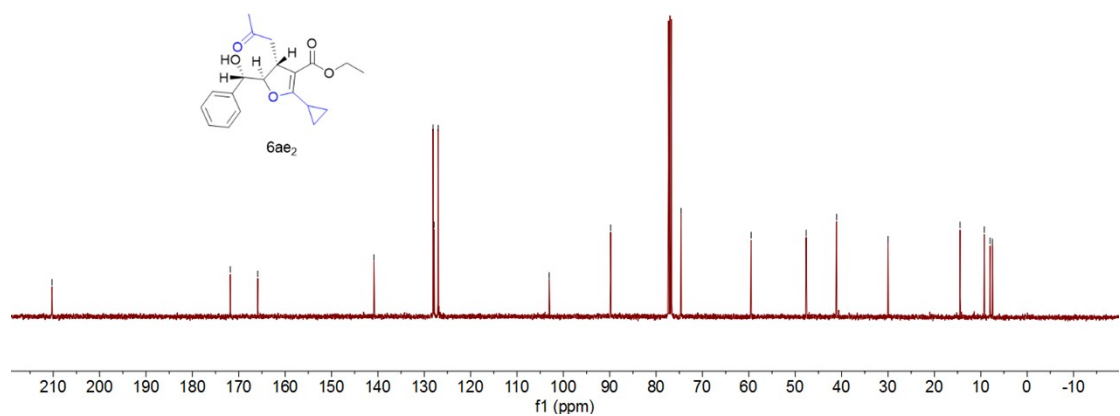

**<sup>1</sup>H and <sup>13</sup>C NMR Spectra for 6be<sub>1</sub>**

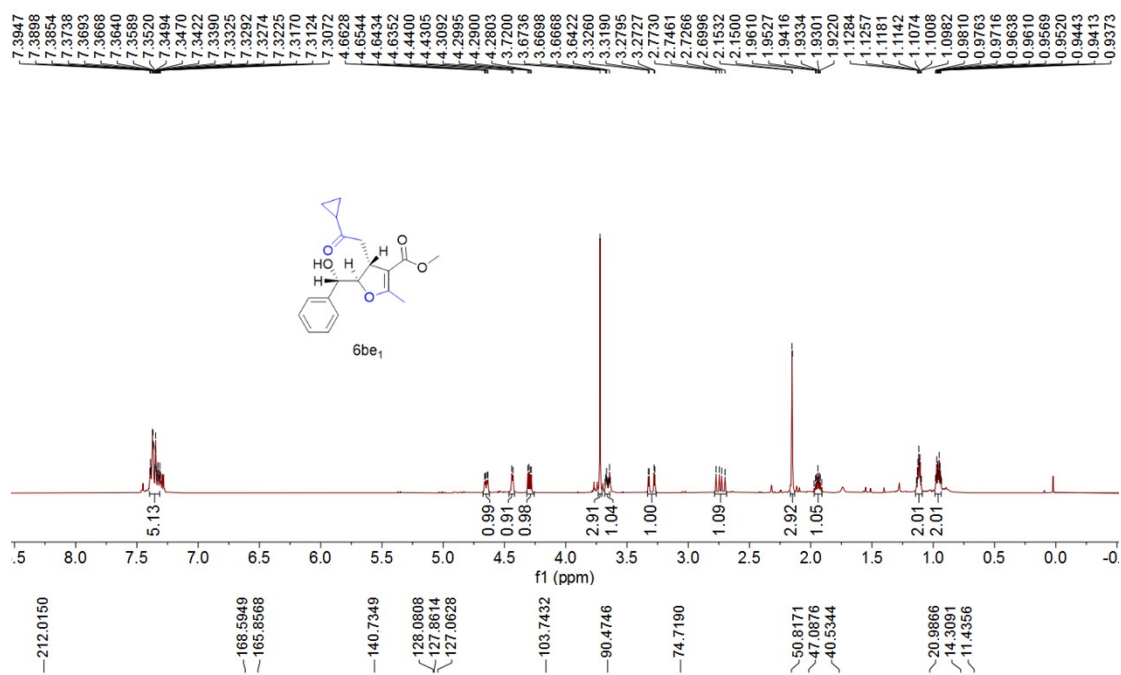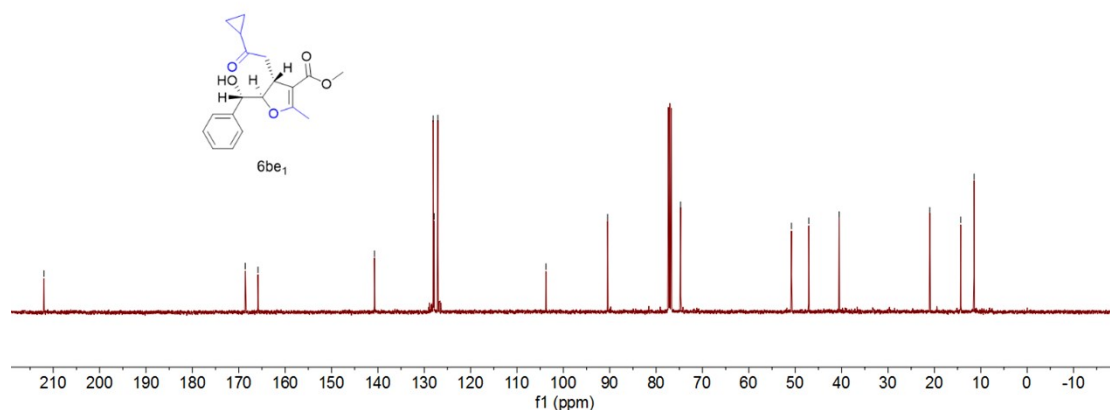

**<sup>1</sup>H and <sup>13</sup>C NMR Spectra for 6be<sub>2</sub>**

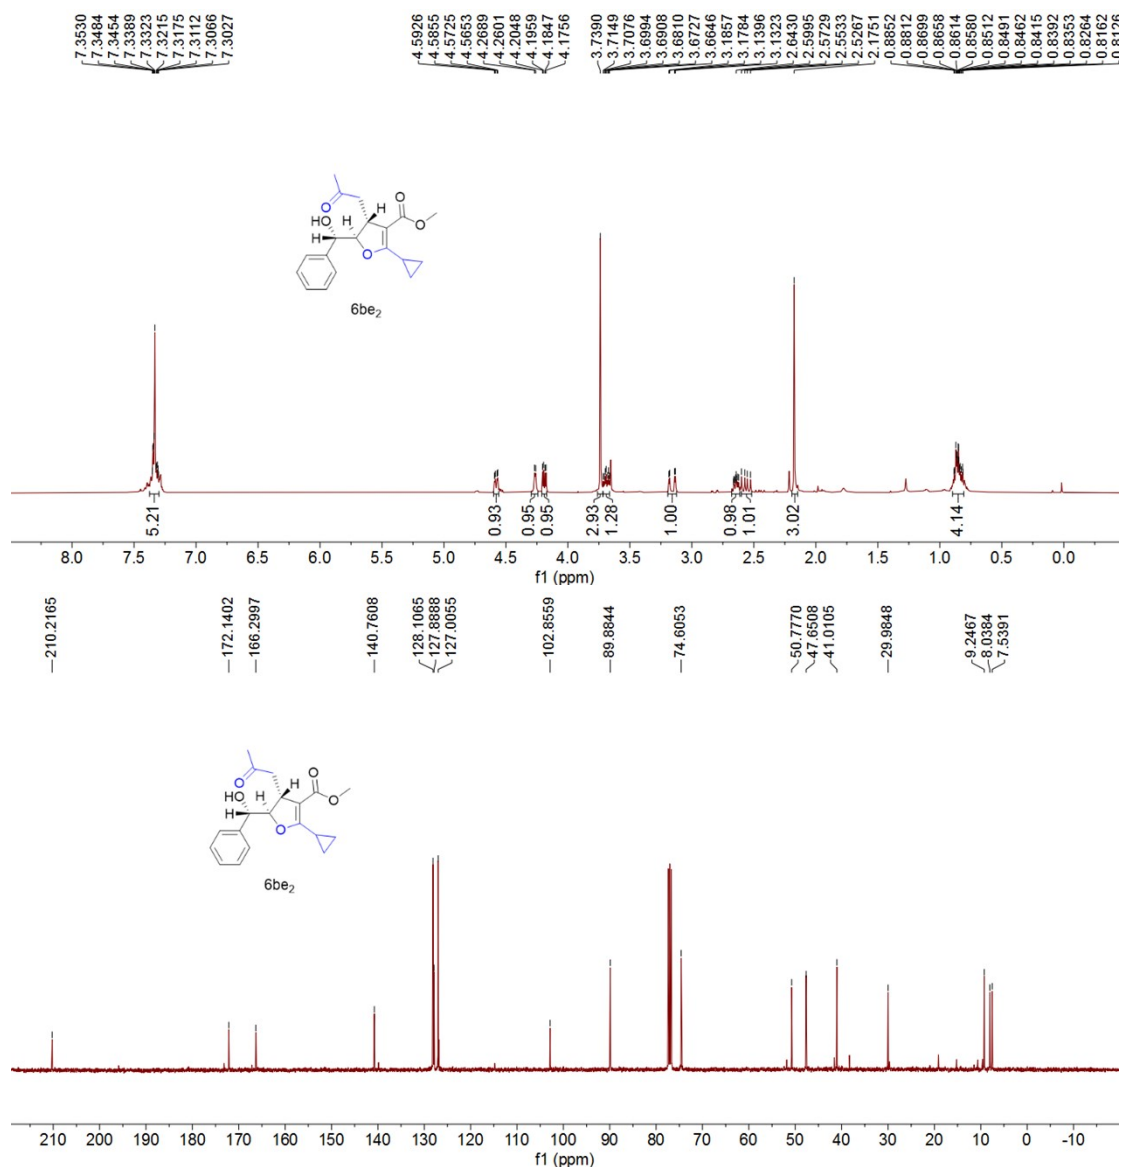

**<sup>1</sup>H and <sup>13</sup>C NMR Spectra for 6de<sub>1</sub>**

4.2305  
4.2229  
4.2127  
4.2054  
4.1948  
4.1877  
4.1772  
4.1699  
4.0259  
4.0156  
4.0080  
3.9978  
3.8121  
3.8050  
3.7956  
3.5123  
3.5092  
3.5056  
3.5020  
3.4990  
3.4948  
3.4916  
3.4889  
3.4854  
3.4823  
3.4786  
3.4750  
3.4720  
3.3712  
3.3648  
3.3253  
3.3199  
2.7579  
2.7309  
2.7120  
2.6850  
2.2134  
2.2100  
2.2100  
1.9565  
1.9484  
1.9433  
1.9369  
1.9289  
1.9255  
1.9174  
1.3238  
1.3060  
1.2882  
1.2306  
1.2151  
1.1056  
1.1022  
1.0999  
1.0942  
1.0898  
1.0863  
1.0834  
1.0784  
1.0750  
1.0706  
1.0653  
0.8484  
0.8458  
0.8416  
0.8355  
0.8296  
0.8261  
0.8220

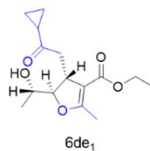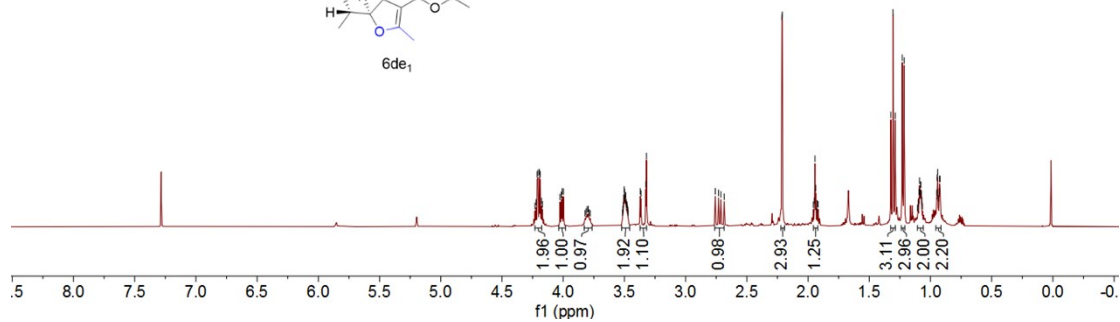

-211.5303  
-168.3944  
-165.5450  
-103.9567  
-91.4811  
-68.9024  
-59.5391  
-47.4303  
-40.3756  
20.9111  
18.7989  
14.3930  
14.3460  
11.2139  
11.1583

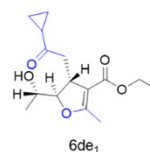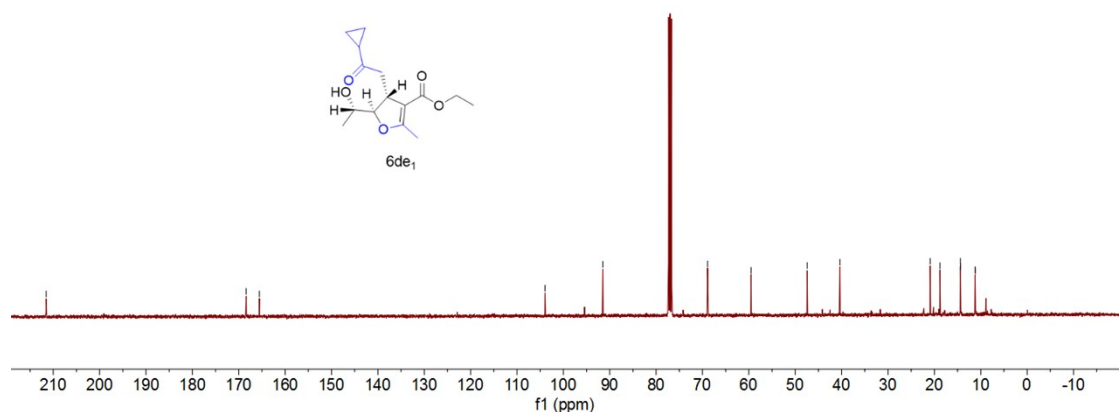

**<sup>1</sup>H and <sup>13</sup>C NMR Spectra for 6de<sub>2</sub>**

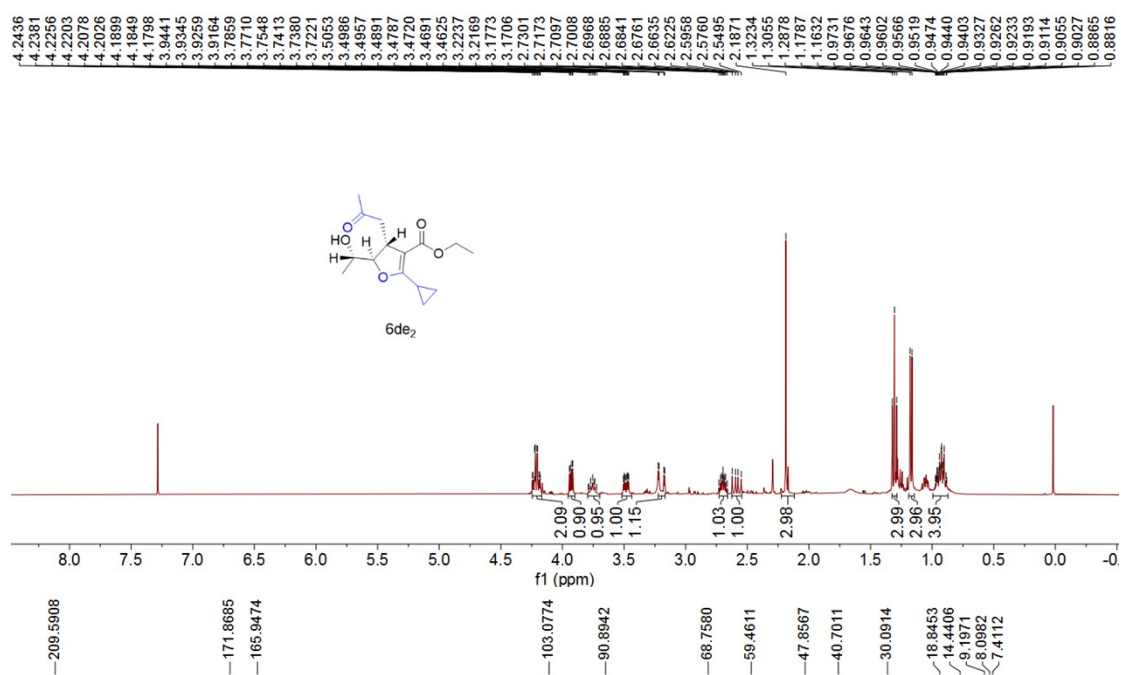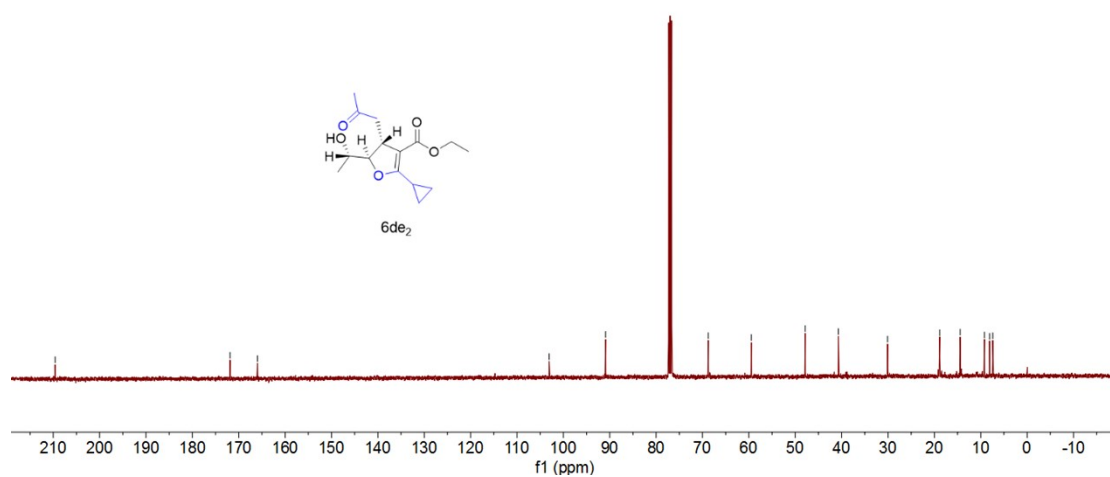



**<sup>1</sup>H and <sup>13</sup>C NMR Spectra for 6ee<sub>1</sub>**

4.0179  
4.0077  
4.0005  
3.9903  
3.8008  
3.7910  
3.7846  
3.7748  
3.7684  
3.7584  
3.7096  
3.5085  
3.4979  
3.4791  
3.4758  
3.4724  
3.4690  
3.4656  
3.4622  
3.4558  
3.4525  
3.4481  
3.4456  
3.4421  
3.4388  
3.3239  
3.3172  
3.2781  
3.2715  
2.7393  
2.7125  
2.6935  
2.6666  
2.1914  
2.1880  
1.9498  
1.9388  
1.9307  
1.9274  
1.9194  
1.9112  
1.9080  
1.8999  
1.2008  
1.1851  
1.0744  
1.0681  
1.0635  
1.0592  
1.0560  
1.0523  
1.0498  
1.0478  
1.0441  
1.0387  
0.9401  
0.8343  
0.8313  
0.8284  
0.8246  
0.8205  
0.8143  
0.8118  
0.8086  
0.8049  
0.8011  
0.8951  
0.8918

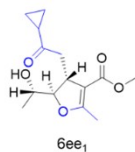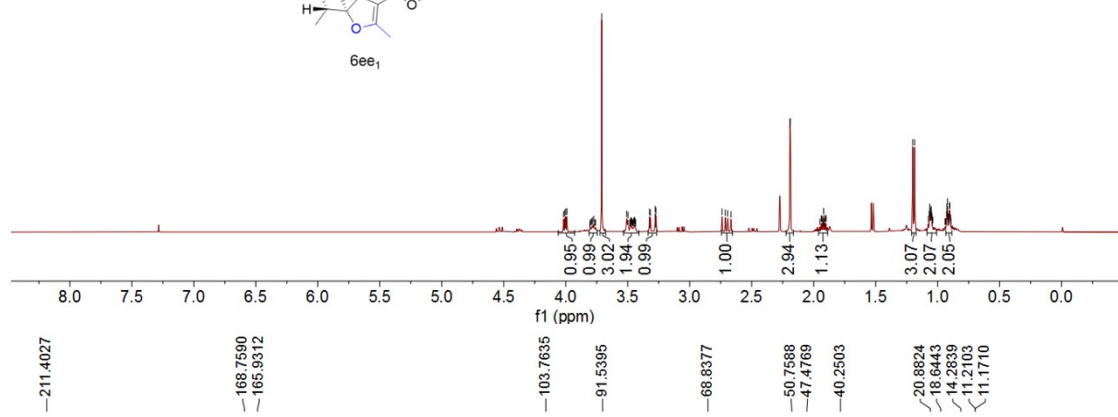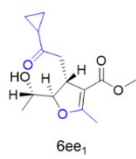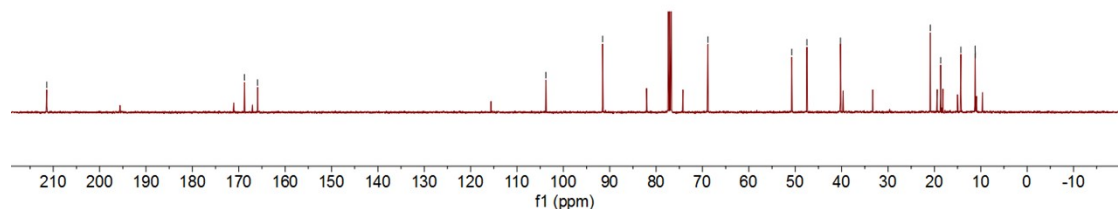

**<sup>1</sup>H and <sup>13</sup>C NMR Spectra for 6ee<sub>2</sub>**

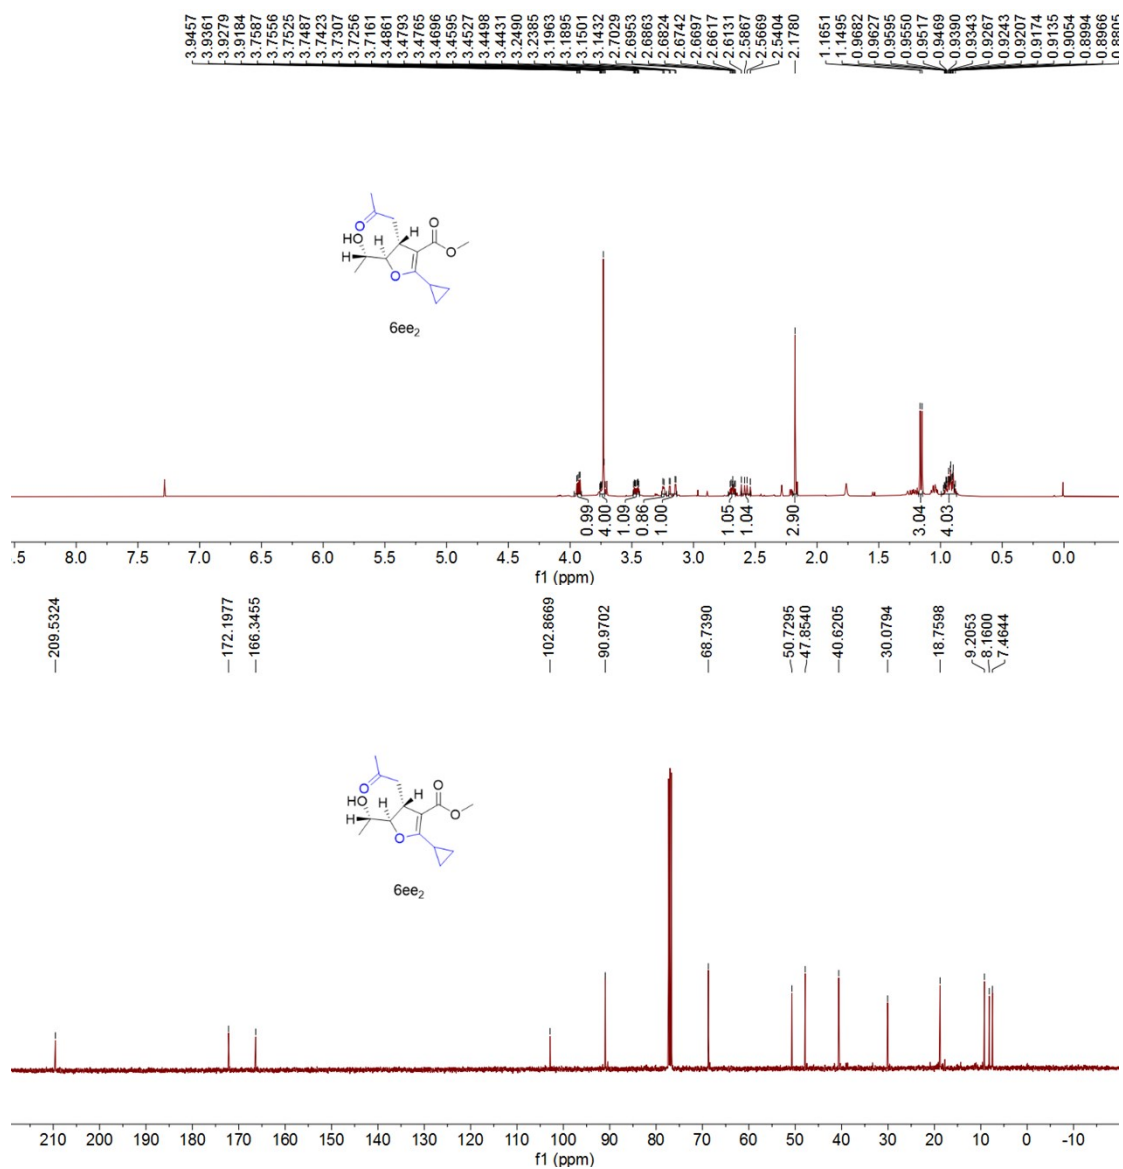

# <sup>1</sup>H and <sup>13</sup>C NMR Spectra for 7aa

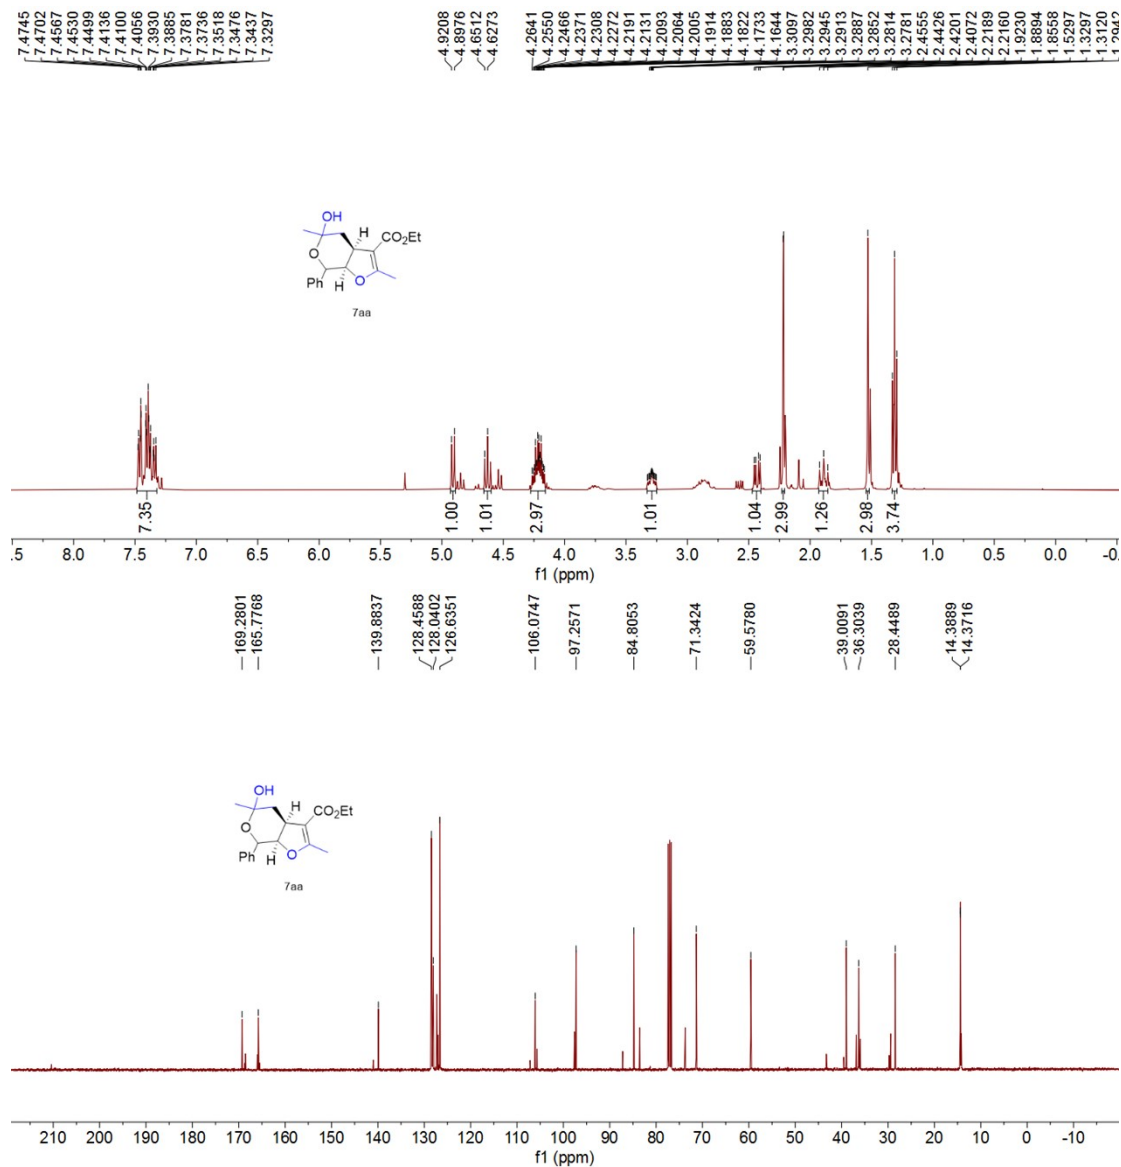

# <sup>1</sup>H and <sup>13</sup>C NMR Spectra for 7ba

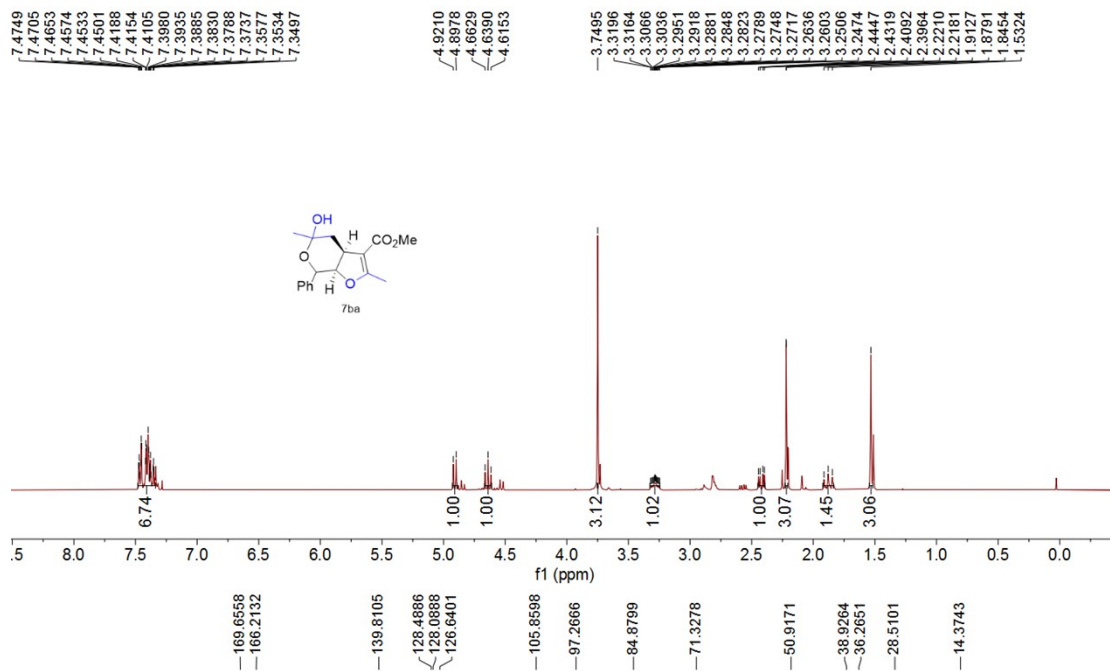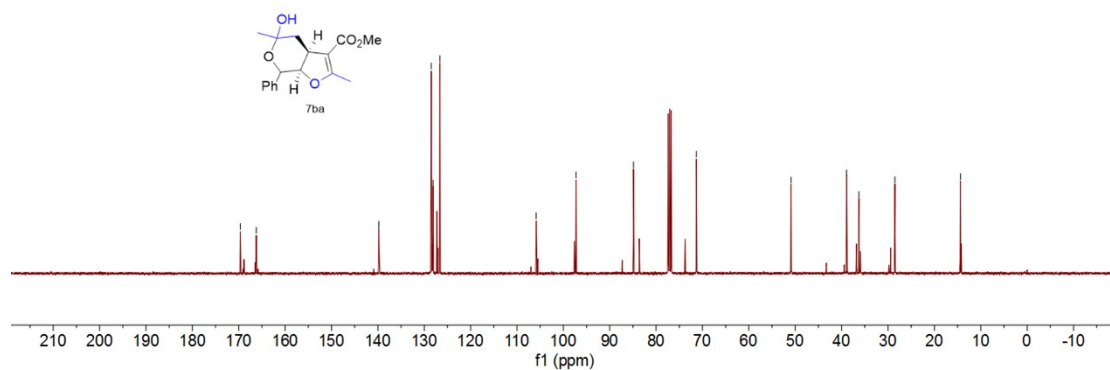

# <sup>1</sup>H and <sup>13</sup>C NMR Spectra for cis-6ad

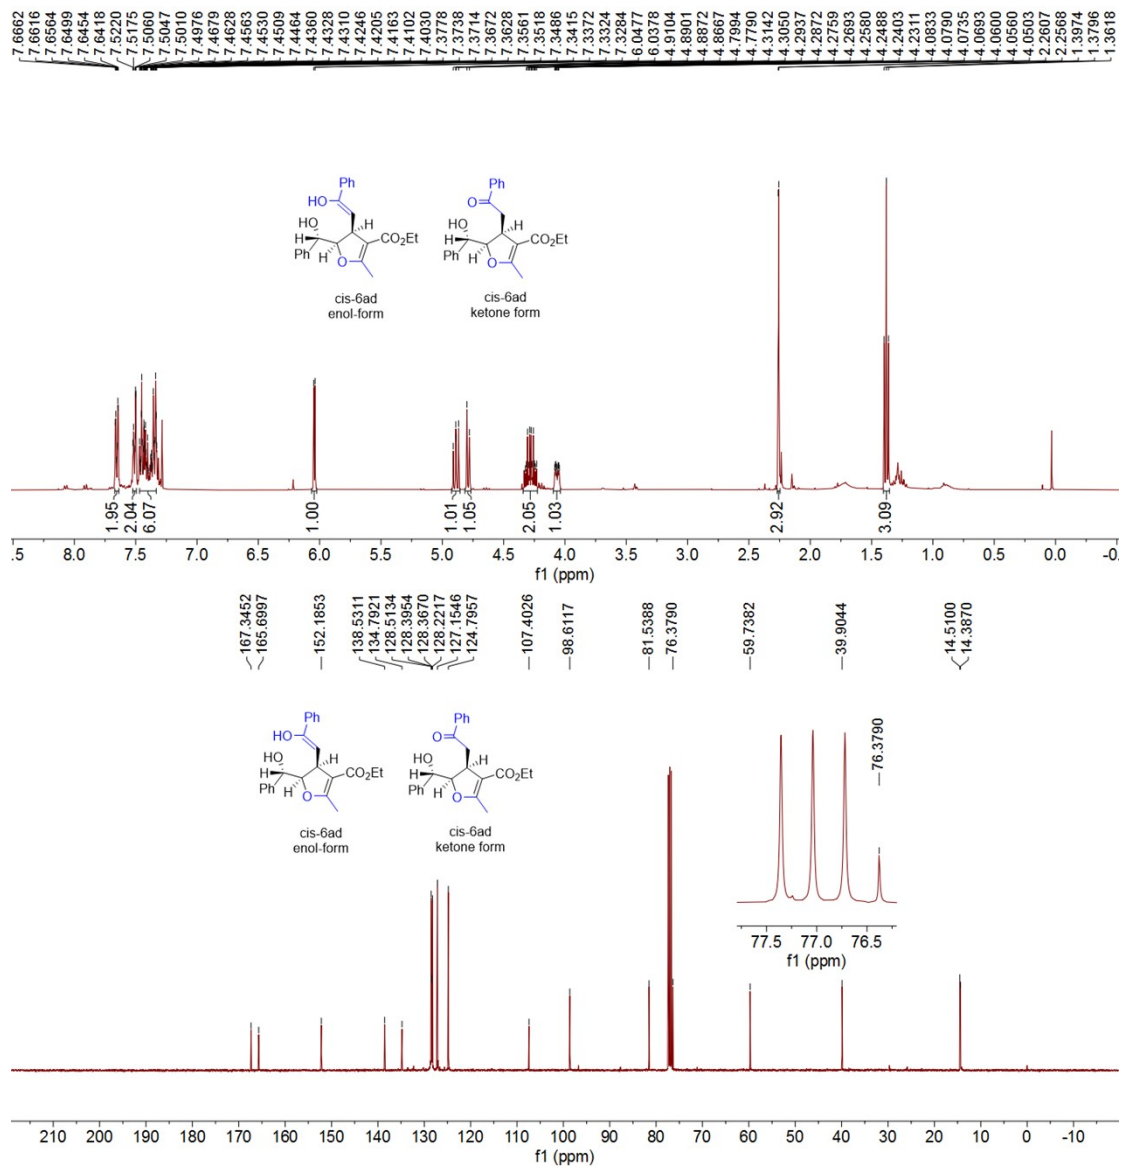

$^1\text{H}$ - $^{13}\text{C}$ -HSQC NMR for cis-6ad

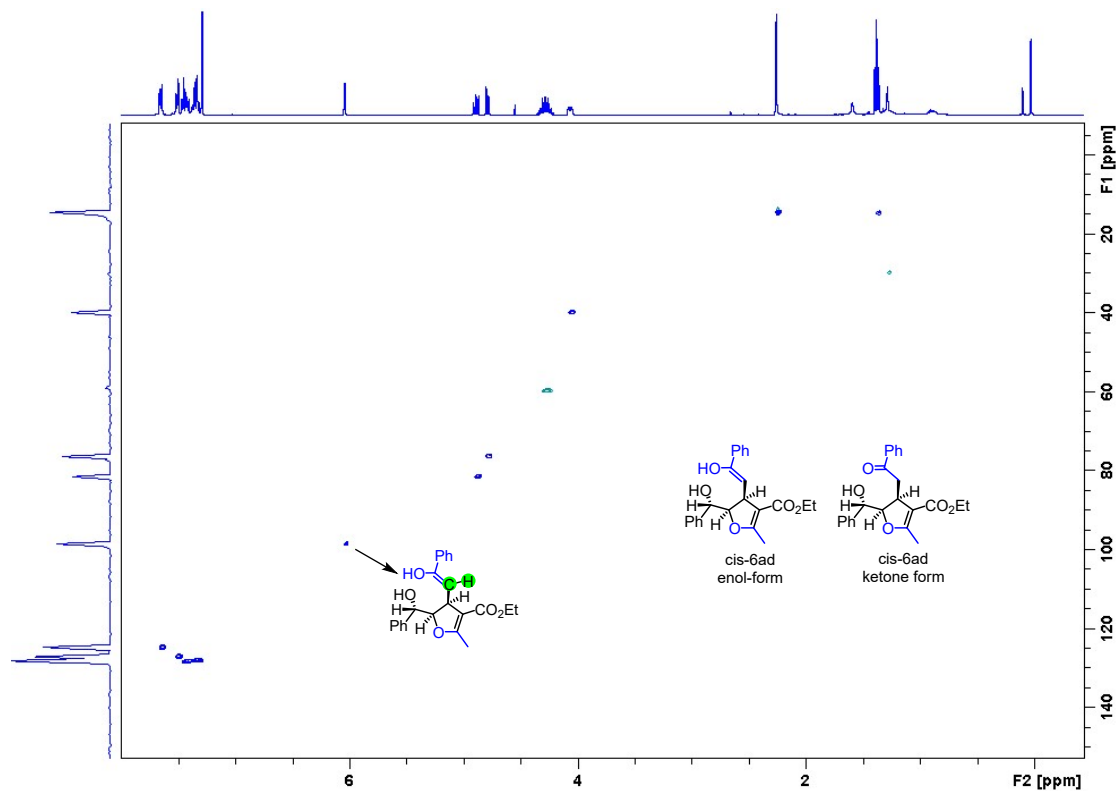

**<sup>1</sup>H and <sup>13</sup>C NMR Spectra for 8aa<sub>1</sub>**

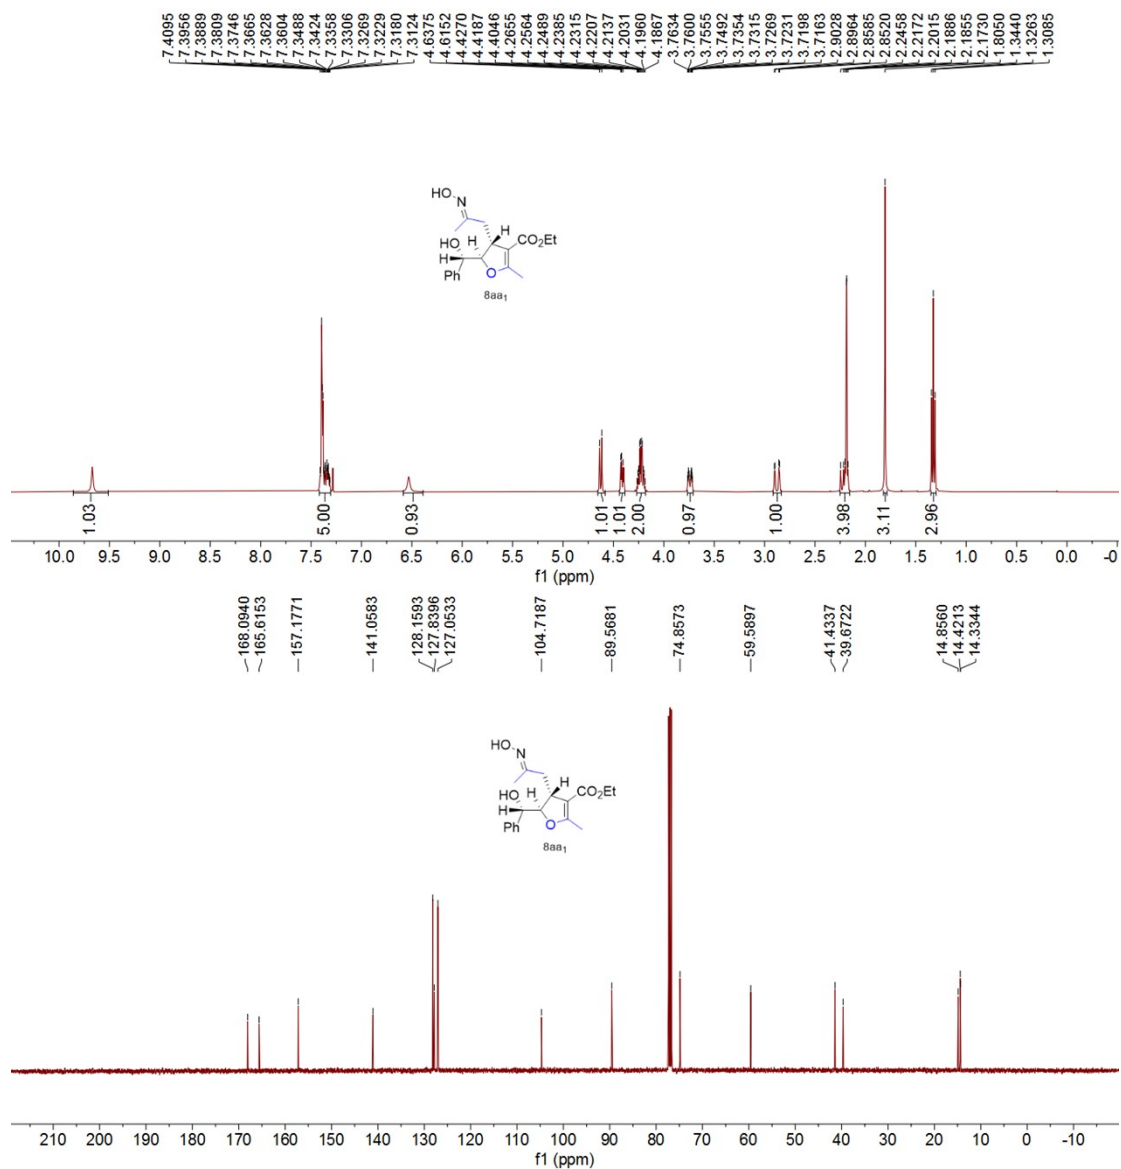

**<sup>1</sup>H and <sup>13</sup>C NMR Spectra for 8aa<sub>2</sub>**

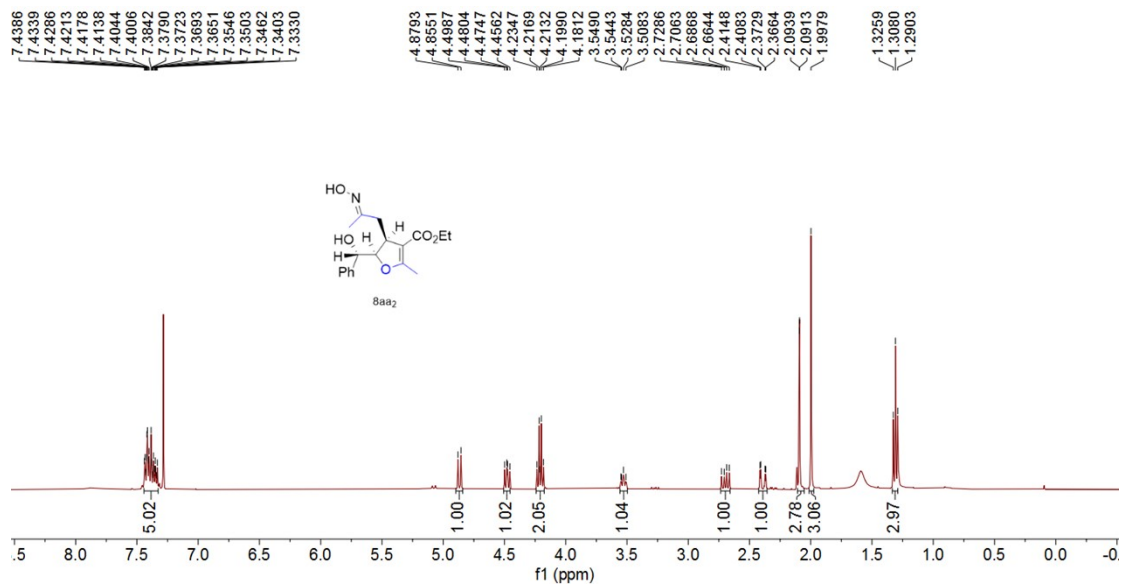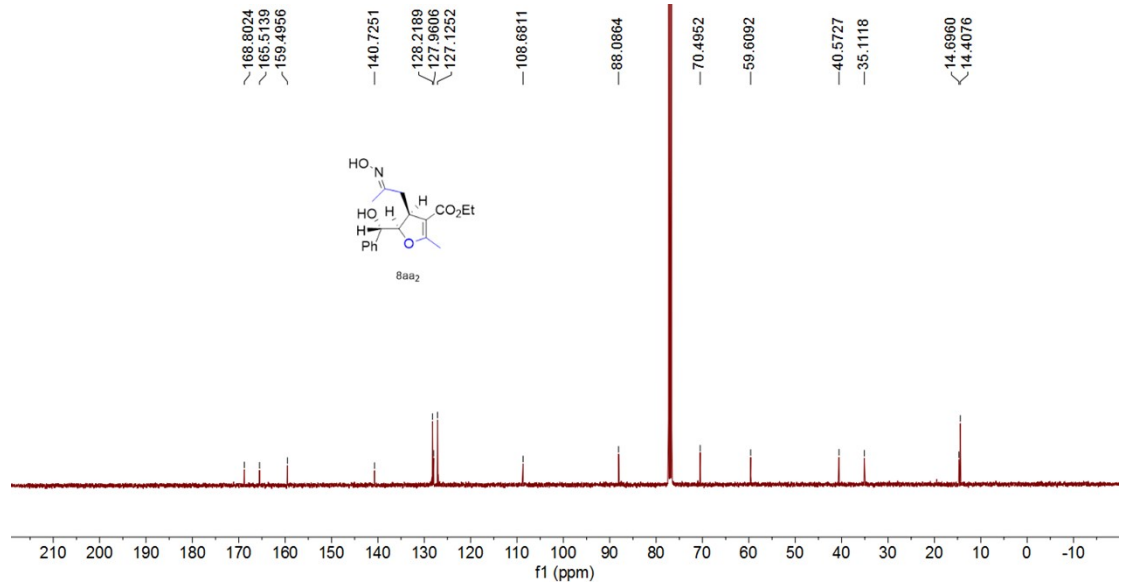



# <sup>1</sup>H and <sup>13</sup>C NMR Spectra for 8ba<sub>1</sub>

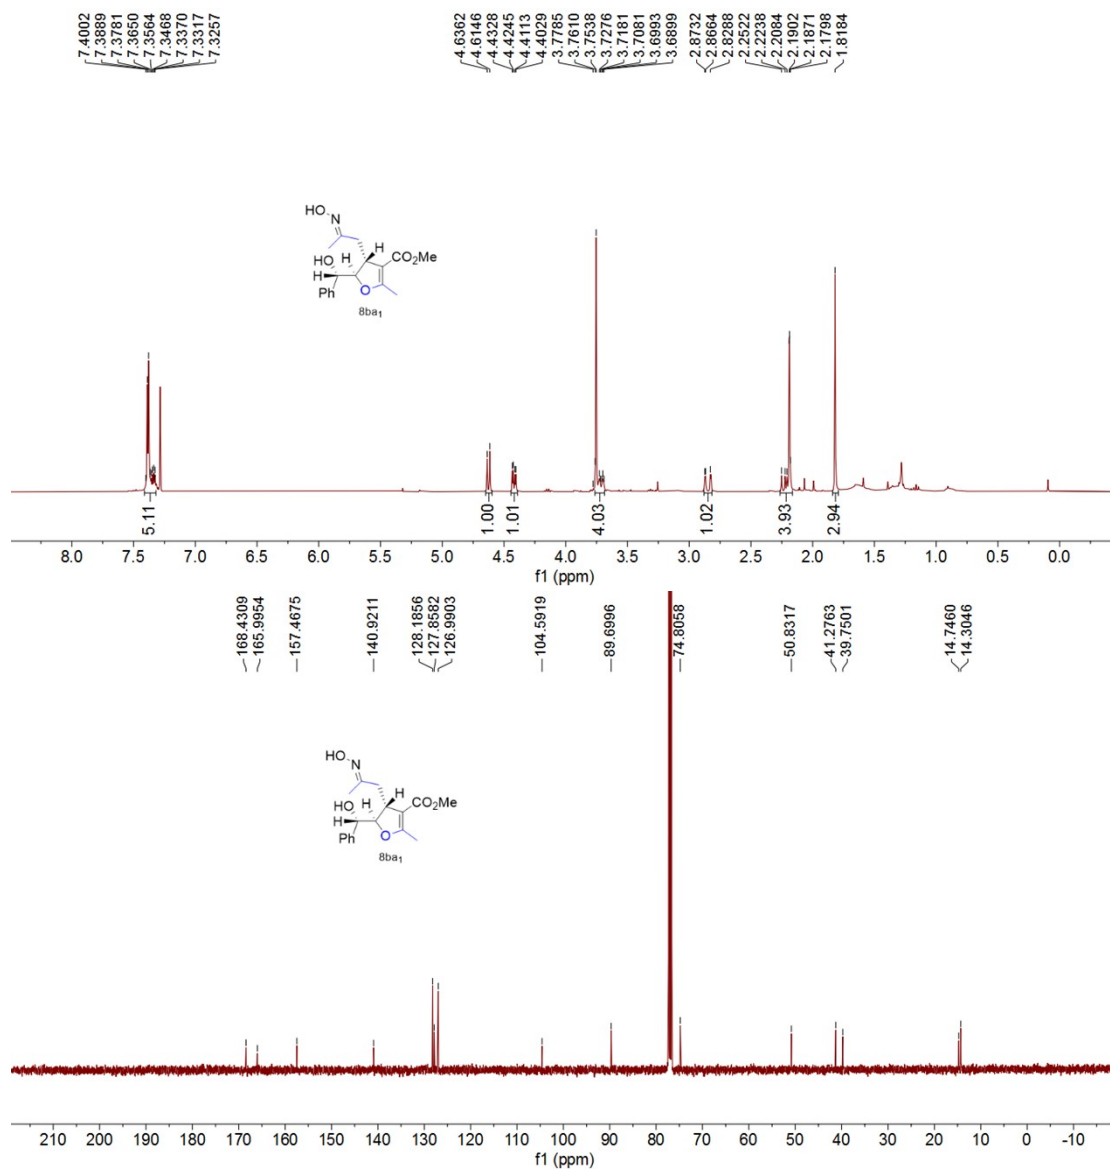

# <sup>1</sup>H and <sup>13</sup>C NMR Spectra for 8ba<sub>2</sub>

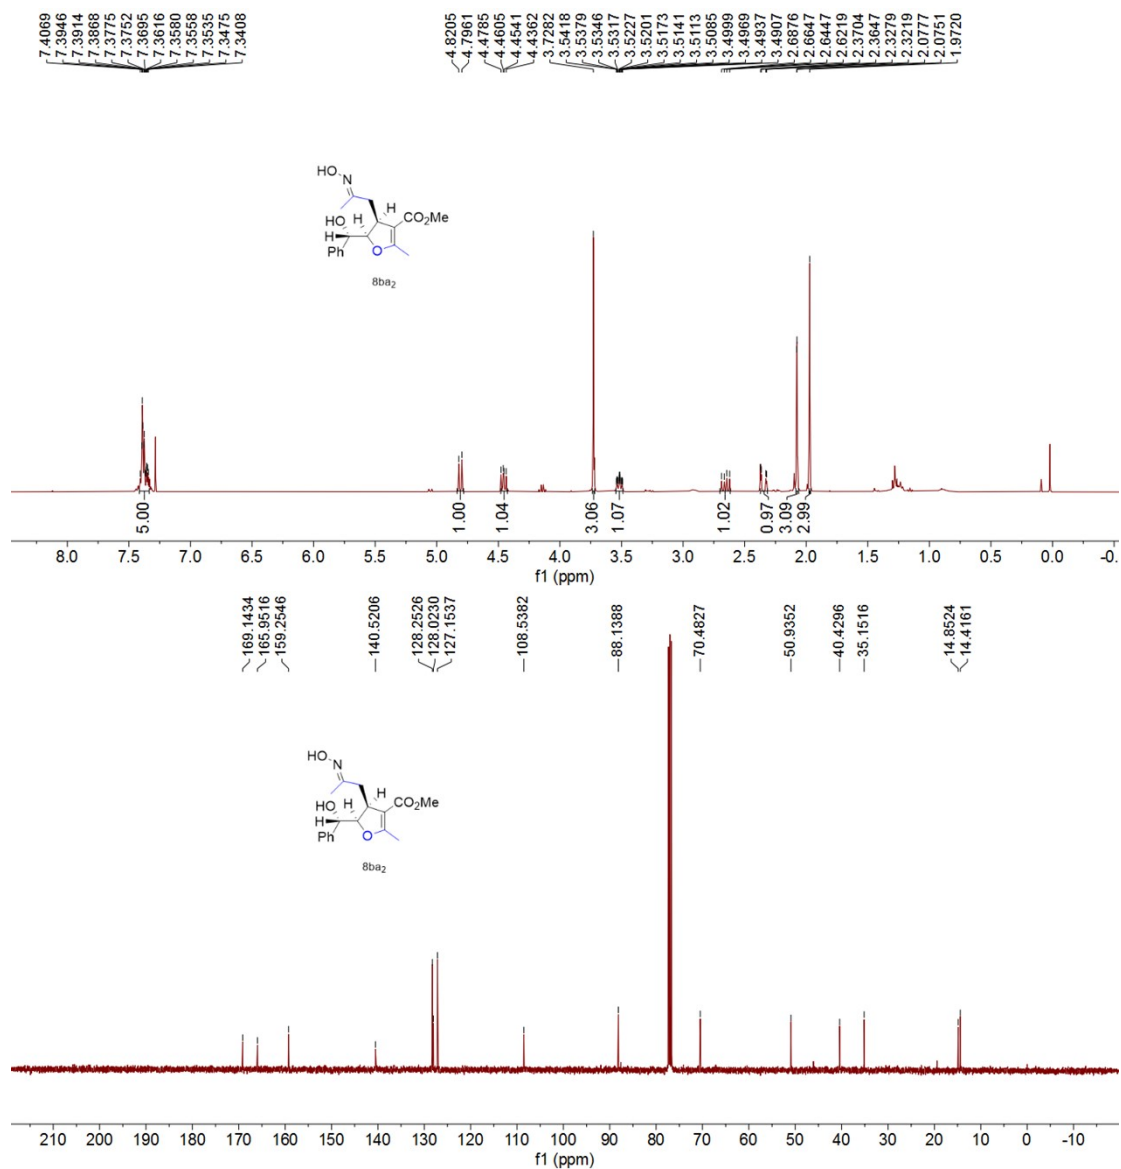

## 8. Infrared Spectroscopy for cis-6ad

tablet method of the crystals

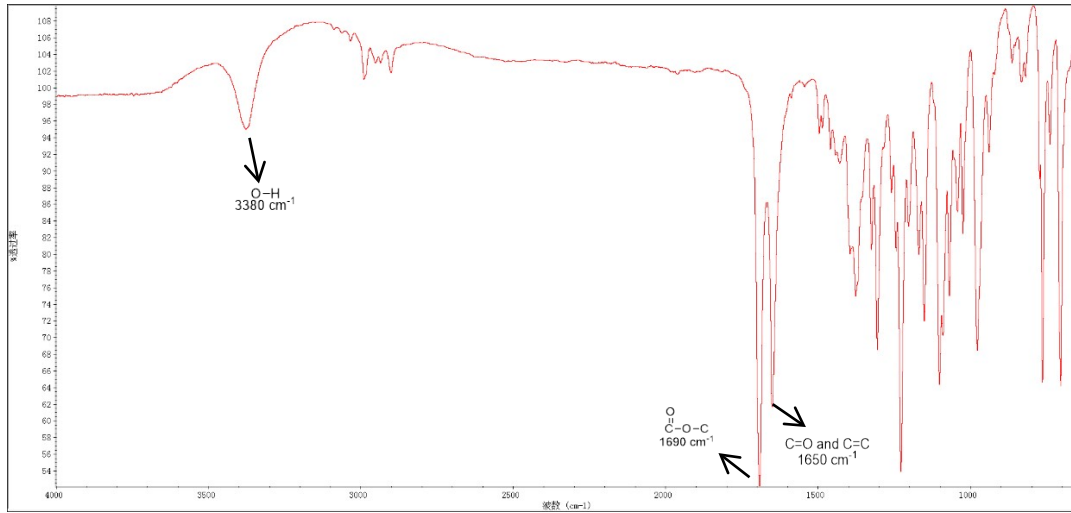

solution method in CHCl<sub>3</sub>

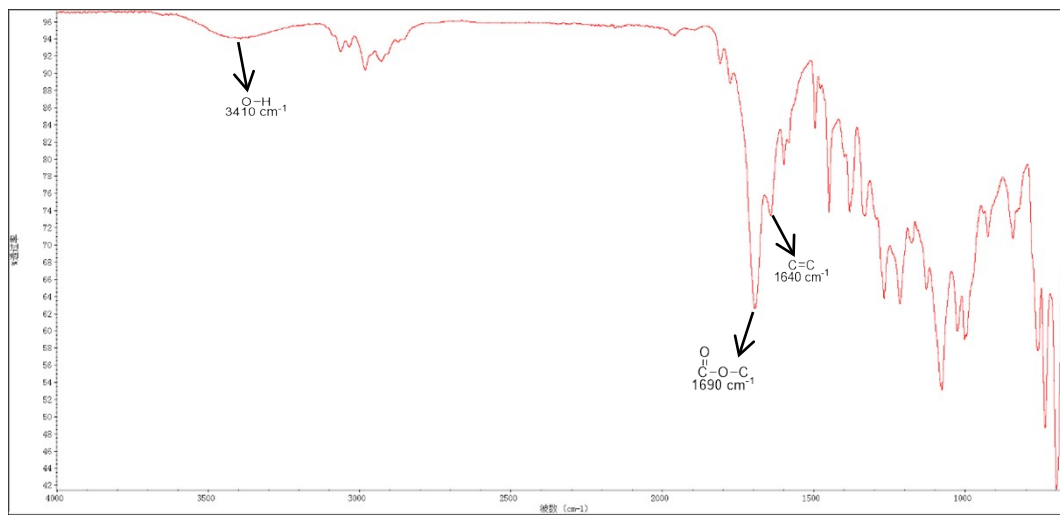

## 9. Density Functional Theory (DFT) calculations results

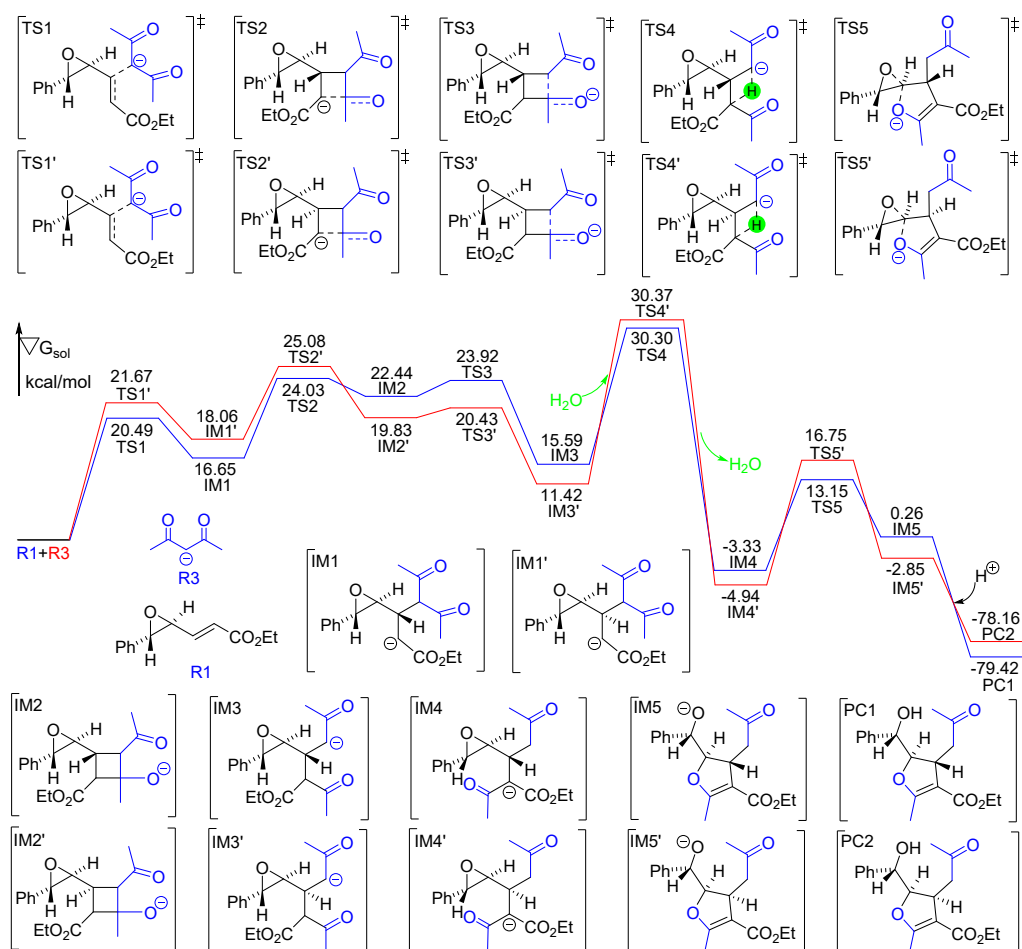

**Figure 1.** DFT-computed free energy surface for the conversion of R1+R2 into PC1/PC2 intermediate at the M062X(D3)/6-31G(d) level with the SMD solvation model and DMF as the solvent.

In order to prove the **Scheme 5** inferred mechanism from R1+R2 to PC1/PC2, DFT calculations at the M062X(D3)/6-31G(d) level with the SMD solvation model and DMF as the solvent were carried out to study the mechanism by Gaussian 09. The intrinsic reaction coordinate (IRC)<sup>19</sup> calculations had confirmed that all stationary points were smoothly connected to each other. The calculated distribution of free energy ( $\Delta G_{sol}$ ) is shown in **Figure 1**, and the intermediate and transition states collected in this reaction process are shown in **Figure 2**. Taking the trans synthesis route as an example, the reaction begins with R1 and R3. Under Michael's induction, R1 and R3 undergo an addition reaction to form the transition state TS1, which absorbs 20.49 kcal/mol. Then, the intermediate IM1 was obtained after 3.84 kcal/mol exothermal heat of TS1. The intermediate IM1 with bond length of 1.64 Å was generated from the transition state TS1 with bond length of 2.04 Å. The intermediate IM2 underwent intramolecular aldol reaction, and the intermediate IM2 was obtained through TS2. The heat was first absorbed by 7.38 kcal/mol and then released by 1.59 kcal/mol. The length of the bond involved in the reaction was shortened from 1.99 Å to 1.72 Å. IM2 breaks the C-C bond through the inverse aldol reaction and generates the intermediate IM3. The heat release of the reaction is 6.85 kcal/mol. The transformation of IM3 to IM4 is a proton transfer process. It has been shown that the energy barrier can be reduced by the water-assisted proton displacement process. Therefore, the way is through the water catalyzed

proton shift process. Finally, IM4 endothermic 3.59 kcal/mol, first through enolization transition and then attack the epoxy group to obtain IM5, IM5 acidized to form the final product PC1. This reaction has multiple endothermic processes, which means that the reaction is more difficult at room temperature. This conclusion is in good agreement with the reaction temperature of 70°C.

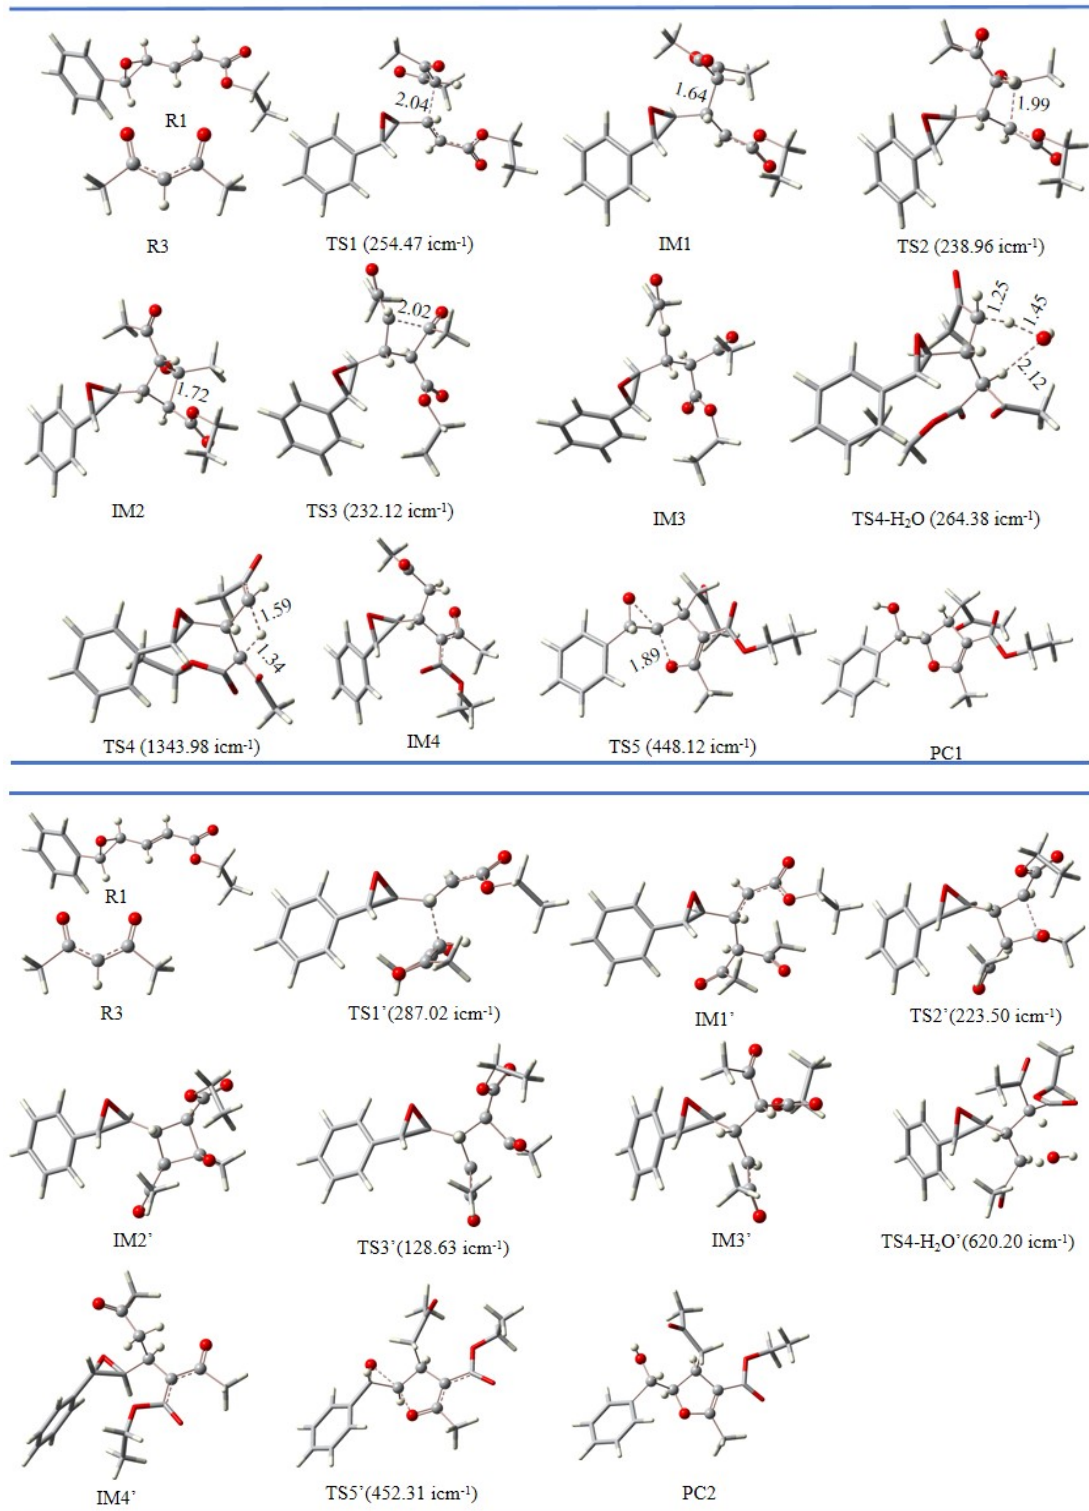

**Figure 2.** Optimized corresponding structures of intermediates and transition states along different pathways of Figure S1 from R1 and R3 conversion to generate PC1/PC2 at the M062X(D3)/6-31G(d) level with the SMD solvation

model and DMF as the solvent (distances in Å). Parameters in parentheses are the unique imaginary frequencies of the transition state.

**Table 1.** The gibbs energies of all optimized stationary points in solvent<sup>a</sup>

| Structure            | Gsol (Hartree) | $\Delta$ Gsol (Hartree) | $\Delta$ Gsol (kcal/mol)<br>= $\Delta$ Gsol(Hartree)*627.51 |
|----------------------|----------------|-------------------------|-------------------------------------------------------------|
| R3                   | -344.9881913   |                         |                                                             |
| R1                   | -728.7197335   |                         |                                                             |
| TS1                  | -1073.675276   | 0.032648677             | 20.49                                                       |
| IM1                  | -1073.681388   | 0.026537007             | 16.65                                                       |
| TS2                  | -1073.669633   | 0.038291537             | 24.03                                                       |
| IM2                  | -1073.672165   | 0.035760267             | 22.44                                                       |
| TS3                  | -1073.669811   | 0.038113807             | 23.92                                                       |
| IM3                  | -1073.683084   | 0.024841207             | 15.59                                                       |
| H <sub>2</sub> O     | -76.38159247   |                         | 0.00                                                        |
| TS4-H <sub>2</sub> O | -1150.041229   | 0.048288467             | 30.30                                                       |
| IM4                  | -1073.713224   | -0.005299423            | -3.33                                                       |
| TS5                  | -1073.686966   | 0.020959037             | 13.15                                                       |
| IM5                  | -1073.707509   | 0.000415877             | 0.26                                                        |
| PC1                  | -1074.21257    | -0.126566849            | -79.42                                                      |

<sup>a</sup>Gibbs free energies for the conversion of R1 and R3 into PC1 at the M06-2X(D3)/6-31G(d) level with the SMD solvation model and DMF as the solvent.

| Structure             | Gsol (Hartree) | $\Delta$ Gsol (Hartree) | $\Delta$ Gsol (kcal/mol)<br>= $\Delta$ Gsol(Hartree)*627.51 |
|-----------------------|----------------|-------------------------|-------------------------------------------------------------|
| R1                    | -728.7197335   |                         |                                                             |
| R3                    | -344.9881913   |                         |                                                             |
| TS1'                  | -1073.673392   | 0.034532687             | 21.67                                                       |
| IM1'                  | -1073.679152   | 0.028772967             | 18.06                                                       |
| TS2'                  | -1073.667961   | 0.039963947             | 25.08                                                       |
| IM2'                  | -1073.676322   | 0.031602617             | 19.83                                                       |
| TS3'                  | -1073.675375   | 0.032550177             | 20.43                                                       |
| IM3'                  | -1073.689721   | 0.018203817             | 11.42                                                       |
| H <sub>2</sub> O      | -76.38159247   |                         | 0.00                                                        |
| TS4'-H <sub>2</sub> O | -1150.041123   | 0.048394087             | 30.37                                                       |

|      |              |              |        |
|------|--------------|--------------|--------|
| IM4' | -1073.71583  | -0.007905373 | -4.96  |
| TS5' | -1073.681228 | 0.026696987  | 16.75  |
| IM5' | -1073.712459 | -0.004534013 | -2.85  |
| PC2  | -1074.210552 | -0.124549709 | -78.16 |

<sup>a</sup>Gibbs free energies for the conversion of R1 and R3 into PC2 at the M06-2X(D3)/6-31G(d) level with the SMD solvation model and DMF as the solvent.

## 10.DFT-calculated Cartesian Coordinates

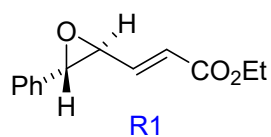

| Center Number | Atomic Number | Atomic Type | Coordinates (Angstroms) |           |           |
|---------------|---------------|-------------|-------------------------|-----------|-----------|
|               |               |             | X                       | Y         | Z         |
| 1             | 6             | 0           | 4.515189                | 1.695399  | -0.361883 |
| 2             | 6             | 0           | 3.247610                | 1.471386  | 0.164755  |
| 3             | 6             | 0           | 2.792227                | 0.168605  | 0.372405  |
| 4             | 6             | 0           | 3.623546                | -0.908795 | 0.061696  |
| 5             | 6             | 0           | 4.891692                | -0.682784 | -0.461455 |
| 6             | 6             | 0           | 5.339555                | 0.618470  | -0.677803 |
| 7             | 1             | 0           | 4.861574                | 2.712720  | -0.521557 |
| 8             | 1             | 0           | 2.605673                | 2.312996  | 0.415943  |
| 9             | 1             | 0           | 3.270182                | -1.917830 | 0.254077  |
| 10            | 1             | 0           | 5.536084                | -1.525698 | -0.695790 |
| 11            | 1             | 0           | 6.331336                | 0.793128  | -1.085383 |
| 12            | 6             | 0           | 1.423437                | -0.059699 | 0.897909  |
| 13            | 1             | 0           | 1.016220                | 0.738676  | 1.521781  |
| 14            | 6             | 0           | 0.445431                | -0.885392 | 0.145578  |
| 15            | 1             | 0           | 0.804145                | -1.338879 | -0.779513 |
| 16            | 6             | 0           | -0.994189               | -0.624247 | 0.243526  |
| 17            | 1             | 0           | -1.367153               | -0.314762 | 1.217512  |
| 18            | 6             | 0           | -1.833196               | -0.728961 | -0.792867 |
| 19            | 1             | 0           | -1.491469               | -1.046352 | -1.774359 |
| 20            | 6             | 0           | -3.275568               | -0.432938 | -0.726054 |
| 21            | 8             | 0           | -4.019470               | -0.530522 | -1.678414 |
| 22            | 8             | 0           | -3.671696               | -0.050466 | 0.501708  |
| 23            | 6             | 0           | -5.064764               | 0.259304  | 0.640172  |
| 24            | 1             | 0           | -5.646332               | -0.462759 | 0.060691  |
| 25            | 1             | 0           | -5.270599               | 0.119061  | 1.704153  |
| 26            | 6             | 0           | -5.359929               | 1.676436  | 0.197802  |

|    |   |   |           |           |           |
|----|---|---|-----------|-----------|-----------|
| 27 | 1 | 0 | -5.165880 | 1.789714  | -0.872058 |
| 28 | 1 | 0 | -6.412879 | 1.914347  | 0.383286  |
| 29 | 1 | 0 | -4.742515 | 2.391987  | 0.749671  |
| 30 | 8 | 0 | 1.086836  | -1.364895 | 1.326564  |

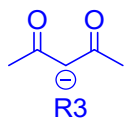

| Center Number | Atomic Number | Atomic Type | Coordinates (Angstroms) |           |           |
|---------------|---------------|-------------|-------------------------|-----------|-----------|
|               |               |             | X                       | Y         | Z         |
| 1             | 6             | 0           | -1.271374               | -0.089109 | -0.000029 |
| 2             | 8             | 0           | -1.540315               | -1.299946 | -0.000000 |
| 3             | 6             | 0           | 0.000000                | 0.542868  | -0.000092 |
| 4             | 1             | 0           | 0.000020                | 1.631587  | -0.000110 |
| 5             | 6             | 0           | 1.271346                | -0.089124 | -0.000028 |
| 6             | 8             | 0           | 1.540280                | -1.299954 | 0.000024  |
| 7             | 6             | 0           | -2.480542               | 0.871358  | 0.000040  |
| 8             | 1             | 0           | -3.102146               | 0.663678  | 0.880529  |
| 9             | 1             | 0           | -2.213289               | 1.935011  | -0.000326 |
| 10            | 1             | 0           | -3.102638               | 0.663176  | -0.879978 |
| 11            | 6             | 0           | 2.480589                | 0.871349  | 0.000029  |
| 12            | 1             | 0           | 3.102341                | 0.663365  | 0.880340  |
| 13            | 1             | 0           | 2.213385                | 1.935010  | -0.000003 |
| 14            | 1             | 0           | 3.102487                | 0.663316  | -0.880164 |

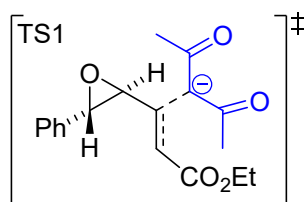

| Center Number | Atomic Number | Atomic Type | Coordinates (Angstroms) |           |           |
|---------------|---------------|-------------|-------------------------|-----------|-----------|
|               |               |             | X                       | Y         | Z         |
| 1             | 6             | 0           | 5.056709                | -2.156937 | 0.059827  |
| 2             | 6             | 0           | 3.776842                | -1.960833 | -0.449101 |
| 3             | 6             | 0           | 3.207488                | -0.685852 | -0.466620 |
| 4             | 6             | 0           | 3.946203                | 0.394588  | 0.022269  |
| 5             | 6             | 0           | 5.225904                | 0.198451  | 0.528390  |
| 6             | 6             | 0           | 5.786488                | -1.077304 | 0.550997  |
| 7             | 1             | 0           | 5.486064                | -3.155918 | 0.070939  |



|    |   |   |           |           |           |
|----|---|---|-----------|-----------|-----------|
| 8  | 1 | 0 | 3.205891  | -2.804172 | -0.831748 |
| 9  | 1 | 0 | 3.501052  | 1.384789  | -0.012787 |
| 10 | 1 | 0 | 5.790757  | 1.047216  | 0.906391  |
| 11 | 1 | 0 | 6.787551  | -1.228736 | 0.947176  |
| 12 | 6 | 0 | 1.829124  | -0.488731 | -0.974582 |
| 13 | 1 | 0 | 1.475455  | -1.237252 | -1.685949 |
| 14 | 6 | 0 | 0.796240  | 0.194038  | -0.170893 |
| 15 | 1 | 0 | 1.104354  | 0.585377  | 0.800433  |
| 16 | 6 | 0 | -0.639999 | -0.172166 | -0.305714 |
| 17 | 1 | 0 | -1.021451 | -0.100929 | -1.323884 |
| 18 | 6 | 0 | -1.071192 | -1.258196 | 0.477447  |
| 19 | 1 | 0 | -0.496041 | -1.569537 | 1.344932  |
| 20 | 6 | 0 | -2.298525 | -1.941955 | 0.284067  |
| 21 | 8 | 0 | -2.738373 | -2.891942 | 0.931263  |
| 22 | 8 | 0 | -3.027653 | -1.416341 | -0.774268 |
| 23 | 6 | 0 | -4.300053 | -1.995772 | -0.977091 |
| 24 | 1 | 0 | -4.548078 | -1.794531 | -2.025314 |
| 25 | 1 | 0 | -4.241448 | -3.078171 | -0.820575 |
| 26 | 6 | 0 | -5.338119 | -1.389950 | -0.049568 |
| 27 | 1 | 0 | -5.370183 | -0.301854 | -0.171466 |
| 28 | 1 | 0 | -6.336135 | -1.795142 | -0.259517 |
| 29 | 1 | 0 | -5.076409 | -1.621831 | 0.986453  |
| 30 | 8 | 0 | 1.430854  | 0.842556  | -1.272003 |
| 31 | 6 | 0 | -1.176135 | 2.505898  | -0.955940 |
| 32 | 8 | 0 | -1.718529 | 2.415638  | -2.057795 |
| 33 | 6 | 0 | -1.557190 | 1.596224  | 0.128265  |
| 34 | 1 | 0 | -2.541600 | 1.165214  | -0.046782 |
| 35 | 6 | 0 | -1.212498 | 1.815007  | 1.520142  |
| 36 | 8 | 0 | -0.210184 | 2.420819  | 1.919629  |
| 37 | 6 | 0 | -0.098726 | 3.546202  | -0.733016 |
| 38 | 1 | 0 | -0.075167 | 4.203726  | -1.606523 |
| 39 | 1 | 0 | -0.269370 | 4.111077  | 0.187442  |
| 40 | 1 | 0 | 0.874532  | 3.059351  | -0.617617 |
| 41 | 6 | 0 | -2.118114 | 1.112064  | 2.506939  |
| 42 | 1 | 0 | -3.164995 | 1.408652  | 2.374123  |
| 43 | 1 | 0 | -2.066550 | 0.029862  | 2.304422  |
| 44 | 1 | 0 | -1.793829 | 1.318316  | 3.530334  |

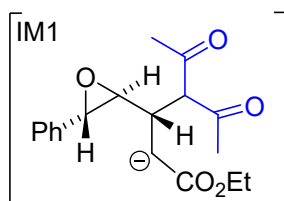

| Center<br>Number | Atomic<br>Number | Atomic<br>Type | Coordinates (Angstroms) |           |           |
|------------------|------------------|----------------|-------------------------|-----------|-----------|
|                  |                  |                | X                       | Y         | Z         |
| 1                | 6                | 0              | 5.238025                | -1.793489 | 0.271467  |
| 2                | 6                | 0              | 3.933680                | -1.648365 | -0.189455 |
| 3                | 6                | 0              | 3.413957                | -0.380190 | -0.457583 |
| 4                | 6                | 0              | 4.224427                | 0.740948  | -0.267661 |
| 5                | 6                | 0              | 5.529490                | 0.595000  | 0.189981  |
| 6                | 6                | 0              | 6.041650                | -0.671785 | 0.462332  |
| 7                | 1                | 0              | 5.628331                | -2.786188 | 0.482486  |
| 8                | 1                | 0              | 3.303121                | -2.523025 | -0.332893 |
| 9                | 1                | 0              | 3.811461                | 1.719447  | -0.495309 |
| 10               | 1                | 0              | 6.151691                | 1.475304  | 0.333474  |
| 11               | 1                | 0              | 7.061904                | -0.784761 | 0.820713  |
| 12               | 6                | 0              | 2.011272                | -0.230051 | -0.916555 |
| 13               | 1                | 0              | 1.612873                | -1.069374 | -1.490404 |
| 14               | 6                | 0              | 1.030804                | 0.570327  | -0.176814 |
| 15               | 1                | 0              | 1.387198                | 1.093571  | 0.712237  |
| 16               | 6                | 0              | -0.430151               | 0.209503  | -0.207016 |
| 17               | 1                | 0              | -0.609269               | -0.276626 | -1.173538 |
| 18               | 6                | 0              | -0.752239               | -0.719492 | 0.896842  |
| 19               | 1                | 0              | -0.179931               | -0.665373 | 1.818545  |
| 20               | 6                | 0              | -1.708730               | -1.724298 | 0.817383  |
| 21               | 8                | 0              | -2.036672               | -2.581818 | 1.647909  |
| 22               | 8                | 0              | -2.380337               | -1.711518 | -0.442789 |
| 23               | 6                | 0              | -3.522570               | -2.533320 | -0.503562 |
| 24               | 1                | 0              | -3.702398               | -2.717342 | -1.571637 |
| 25               | 1                | 0              | -3.314871               | -3.487494 | -0.006600 |
| 26               | 6                | 0              | -4.728121               | -1.866307 | 0.137956  |
| 27               | 1                | 0              | -4.893480               | -0.870875 | -0.287322 |
| 28               | 1                | 0              | -5.634342               | -2.471264 | -0.000116 |
| 29               | 1                | 0              | -4.539659               | -1.755895 | 1.209479  |
| 30               | 8                | 0              | 1.619687                | 1.056442  | -1.390879 |
| 31               | 6                | 0              | -1.147448               | 2.399058  | 0.947100  |
| 32               | 8                | 0              | -0.313430               | 3.289805  | 1.040646  |
| 33               | 6                | 0              | -1.245856               | 1.605398  | -0.332513 |
| 34               | 1                | 0              | -0.690173               | 2.170875  | -1.092666 |
| 35               | 6                | 0              | -2.626840               | 1.362458  | -0.890845 |
| 36               | 8                | 0              | -3.667033               | 1.569382  | -0.290287 |
| 37               | 6                | 0              | -2.007480               | 1.982706  | 2.097226  |
| 38               | 1                | 0              | -1.742770               | 2.553758  | 2.990776  |
| 39               | 1                | 0              | -3.061256               | 2.108056  | 1.832419  |
| 40               | 1                | 0              | -1.860093               | 0.899367  | 2.240412  |
| 41               | 6                | 0              | -2.664577               | 0.831479  | -2.308465 |

|    |   |   |           |           |           |
|----|---|---|-----------|-----------|-----------|
| 42 | 1 | 0 | -1.842857 | 1.212645  | -2.922968 |
| 43 | 1 | 0 | -2.570170 | -0.258479 | -2.242711 |
| 44 | 1 | 0 | -3.628790 | 1.077833  | -2.760079 |

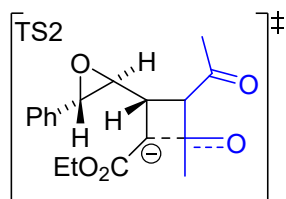

| Center Number | Atomic Number | Atomic Type | Coordinates (Angstroms) |           |           |
|---------------|---------------|-------------|-------------------------|-----------|-----------|
|               |               |             | X                       | Y         | Z         |
| 1             | 6             | 0           | 4.839286                | -0.362738 | 1.353037  |
| 2             | 6             | 0           | 3.450120                | -0.406861 | 1.298400  |
| 3             | 6             | 0           | 2.800346                | -0.877092 | 0.155152  |
| 4             | 6             | 0           | 3.564303                | -1.318880 | -0.926780 |
| 5             | 6             | 0           | 4.953053                | -1.278465 | -0.870571 |
| 6             | 6             | 0           | 5.596418                | -0.798060 | 0.268069  |
| 7             | 1             | 0           | 5.332106                | 0.011905  | 2.246786  |
| 8             | 1             | 0           | 2.859180                | -0.067603 | 2.146375  |
| 9             | 1             | 0           | 3.045762                | -1.703596 | -1.800335 |
| 10            | 1             | 0           | 5.537671                | -1.625990 | -1.719183 |
| 11            | 1             | 0           | 6.682246                | -0.765429 | 0.310939  |
| 12            | 6             | 0           | 1.317980                | -0.885712 | 0.089977  |
| 13            | 1             | 0           | 0.799374                | -1.008824 | 1.041930  |
| 14            | 6             | 0           | 0.584980                | -0.165318 | -0.965923 |
| 15            | 1             | 0           | 1.202960                | 0.333136  | -1.718960 |
| 16            | 6             | 0           | -0.802008               | 0.396225  | -0.786119 |
| 17            | 1             | 0           | -1.411365               | -0.039498 | -1.585398 |
| 18            | 6             | 0           | -1.530697               | 0.198062  | 0.526229  |
| 19            | 1             | 0           | -0.941427               | 0.378789  | 1.423095  |
| 20            | 6             | 0           | -2.456468               | -0.890723 | 0.731987  |
| 21            | 8             | 0           | -2.866361               | -1.315059 | 1.804488  |
| 22            | 8             | 0           | -2.945553               | -1.400043 | -0.455386 |
| 23            | 6             | 0           | -3.902565               | -2.434196 | -0.323159 |
| 24            | 1             | 0           | -4.571693               | -2.208960 | 0.513561  |
| 25            | 1             | 0           | -4.476045               | -2.419055 | -1.256893 |
| 26            | 6             | 0           | -3.235153               | -3.781542 | -0.116906 |
| 27            | 1             | 0           | -2.702928               | -3.781231 | 0.837837  |
| 28            | 1             | 0           | -3.979018               | -4.588027 | -0.105517 |
| 29            | 1             | 0           | -2.515440               | -3.977901 | -0.918586 |
| 30            | 8             | 0           | 0.718106                | -1.589149 | -0.988823 |
| 31            | 6             | 0           | 0.236145                | 2.765610  | -0.486231 |

|    |   |   |           |          |           |
|----|---|---|-----------|----------|-----------|
| 32 | 8 | 0 | 0.714207  | 3.572021 | -1.272540 |
| 33 | 6 | 0 | -0.955856 | 1.933335 | -0.865634 |
| 34 | 1 | 0 | -1.270069 | 2.293912 | -1.852553 |
| 35 | 6 | 0 | -2.150504 | 1.924029 | 0.219242  |
| 36 | 8 | 0 | -2.140912 | 2.698232 | 1.216139  |
| 37 | 6 | 0 | 0.761868  | 2.632444 | 0.914558  |
| 38 | 1 | 0 | 1.602961  | 3.312858 | 1.067952  |
| 39 | 1 | 0 | -0.099085 | 2.859371 | 1.565837  |
| 40 | 1 | 0 | 1.068847  | 1.603421 | 1.130165  |
| 41 | 6 | 0 | -3.489278 | 1.758092 | -0.506510 |
| 42 | 1 | 0 | -3.475005 | 1.002054 | -1.298836 |
| 43 | 1 | 0 | -4.252531 | 1.484794 | 0.229464  |
| 44 | 1 | 0 | -3.764224 | 2.728606 | -0.941610 |

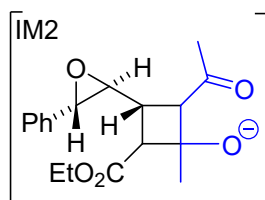

| Center Number | Atomic Number | Atomic Type | Coordinates (Angstroms) |           |           |
|---------------|---------------|-------------|-------------------------|-----------|-----------|
|               |               |             | X                       | Y         | Z         |
| 1             | 6             | 0           | 4.872514                | -2.106814 | 0.364921  |
| 2             | 6             | 0           | 3.623474                | -1.900539 | -0.212237 |
| 3             | 6             | 0           | 3.162597                | -0.607303 | -0.465769 |
| 4             | 6             | 0           | 3.980029                | 0.478848  | -0.144574 |
| 5             | 6             | 0           | 5.228919                | 0.272936  | 0.429681  |
| 6             | 6             | 0           | 5.680528                | -1.019898 | 0.688349  |
| 7             | 1             | 0           | 5.215978                | -3.119649 | 0.561440  |
| 8             | 1             | 0           | 2.991978                | -2.750178 | -0.463795 |
| 9             | 1             | 0           | 3.618976                | 1.479605  | -0.362817 |
| 10            | 1             | 0           | 5.854971                | 1.126913  | 0.676947  |
| 11            | 1             | 0           | 6.657259                | -1.179176 | 1.138466  |
| 12            | 6             | 0           | 1.816800                | -0.392058 | -1.050920 |
| 13            | 1             | 0           | 1.427511                | -1.226853 | -1.639293 |
| 14            | 6             | 0           | 0.829084                | 0.503032  | -0.425948 |
| 15            | 1             | 0           | 1.116248                | 1.023292  | 0.488273  |
| 16            | 6             | 0           | -0.638363               | 0.236329  | -0.559271 |
| 17            | 1             | 0           | -0.820441               | -0.298402 | -1.499854 |
| 18            | 6             | 0           | -1.123215               | -0.475374 | 0.716747  |
| 19            | 1             | 0           | -0.355570               | -0.843833 | 1.397899  |
| 20            | 6             | 0           | -2.186820               | -1.471505 | 0.606981  |
| 21            | 8             | 0           | -2.463250               | -2.322844 | 1.437028  |

|    |   |   |           |           |           |
|----|---|---|-----------|-----------|-----------|
| 22 | 8 | 0 | -2.947190 | -1.317040 | -0.525595 |
| 23 | 6 | 0 | -4.077597 | -2.168991 | -0.626297 |
| 24 | 1 | 0 | -4.533593 | -2.283199 | 0.362113  |
| 25 | 1 | 0 | -4.774112 | -1.642394 | -1.286877 |
| 26 | 6 | 0 | -3.702851 | -3.523979 | -1.195702 |
| 27 | 1 | 0 | -3.027787 | -4.037728 | -0.506280 |
| 28 | 1 | 0 | -4.596197 | -4.144008 | -1.339220 |
| 29 | 1 | 0 | -3.201661 | -3.408785 | -2.162800 |
| 30 | 8 | 0 | 1.548474  | 0.891137  | -1.603762 |
| 31 | 6 | 0 | -1.330886 | 2.852411  | -0.719090 |
| 32 | 8 | 0 | -2.196860 | 3.517065  | -1.279738 |
| 33 | 6 | 0 | -1.587061 | 1.433055  | -0.337606 |
| 34 | 1 | 0 | -2.559862 | 1.159726  | -0.754620 |
| 35 | 6 | 0 | -1.577855 | 1.086047  | 1.258947  |
| 36 | 8 | 0 | -0.637689 | 1.617680  | 1.960505  |
| 37 | 6 | 0 | -0.044321 | 3.477068  | -0.256344 |
| 38 | 1 | 0 | -0.088420 | 4.560710  | -0.396898 |
| 39 | 1 | 0 | 0.070665  | 3.186455  | 0.802146  |
| 40 | 1 | 0 | 0.811118  | 3.069653  | -0.807333 |
| 41 | 6 | 0 | -2.974514 | 1.125035  | 1.882376  |
| 42 | 1 | 0 | -3.739826 | 0.635777  | 1.267676  |
| 43 | 1 | 0 | -2.938802 | 0.639933  | 2.864249  |
| 44 | 1 | 0 | -3.259096 | 2.174344  | 2.027602  |

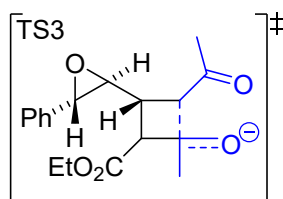

| Center Number | Atomic Number | Atomic Type | Coordinates (Angstroms) |           |           |
|---------------|---------------|-------------|-------------------------|-----------|-----------|
|               |               |             | X                       | Y         | Z         |
| 1             | 6             | 0           | -4.701271               | 0.321768  | 0.890300  |
| 2             | 6             | 0           | -3.471730               | 0.530074  | 0.274406  |
| 3             | 6             | 0           | -2.813854               | -0.520960 | -0.369414 |
| 4             | 6             | 0           | -3.414000               | -1.781796 | -0.397626 |
| 5             | 6             | 0           | -4.644592               | -1.988580 | 0.215944  |
| 6             | 6             | 0           | -5.293056               | -0.939033 | 0.863612  |
| 7             | 1             | 0           | -5.199364               | 1.147318  | 1.392983  |
| 8             | 1             | 0           | -3.008073               | 1.513964  | 0.299221  |
| 9             | 1             | 0           | -2.900668               | -2.585078 | -0.918375 |
| 10            | 1             | 0           | -5.102339               | -2.974580 | 0.186417  |
| 11            | 1             | 0           | -6.254841               | -1.102029 | 1.343510  |

|    |   |   |           |           |           |
|----|---|---|-----------|-----------|-----------|
| 12 | 6 | 0 | -1.486113 | -0.299626 | -0.989838 |
| 13 | 1 | 0 | -1.299677 | 0.711038  | -1.358026 |
| 14 | 6 | 0 | -0.296264 | -1.071486 | -0.584429 |
| 15 | 1 | 0 | -0.462519 | -1.849326 | 0.162381  |
| 16 | 6 | 0 | 1.073600  | -0.457205 | -0.651626 |
| 17 | 1 | 0 | 1.068513  | 0.175947  | -1.545271 |
| 18 | 6 | 0 | 1.463281  | 0.408356  | 0.538948  |
| 19 | 1 | 0 | 1.225429  | -0.059343 | 1.495992  |
| 20 | 6 | 0 | 1.013570  | 1.821905  | 0.618146  |
| 21 | 8 | 0 | 0.930746  | 2.492703  | 1.627264  |
| 22 | 8 | 0 | 0.746605  | 2.354273  | -0.613095 |
| 23 | 6 | 0 | 0.403508  | 3.734087  | -0.623560 |
| 24 | 1 | 0 | 1.016234  | 4.262687  | 0.112718  |
| 25 | 1 | 0 | 0.661821  | 4.084122  | -1.627798 |
| 26 | 6 | 0 | -1.070529 | 3.941243  | -0.333295 |
| 27 | 1 | 0 | -1.330140 | 5.004609  | -0.395905 |
| 28 | 1 | 0 | -1.688566 | 3.393849  | -1.053550 |
| 29 | 1 | 0 | -1.300944 | 3.586866  | 0.675295  |
| 30 | 8 | 0 | -0.969952 | -1.332965 | -1.818806 |
| 31 | 6 | 0 | 2.553944  | -2.549262 | 0.020088  |
| 32 | 8 | 0 | 3.296381  | -3.447203 | -0.396551 |
| 33 | 6 | 0 | 2.312932  | -1.342031 | -0.737975 |
| 34 | 1 | 0 | 2.740895  | -1.434658 | -1.737838 |
| 35 | 6 | 0 | 3.049782  | 0.176571  | 0.372609  |
| 36 | 8 | 0 | 3.724891  | -0.051556 | 1.394877  |
| 37 | 6 | 0 | 2.057251  | -2.632714 | 1.452057  |
| 38 | 1 | 0 | 1.004044  | -2.358828 | 1.581265  |
| 39 | 1 | 0 | 2.221173  | -3.645134 | 1.830325  |
| 40 | 1 | 0 | 2.660813  | -1.910569 | 2.024446  |
| 41 | 6 | 0 | 3.684260  | 1.018061  | -0.732953 |
| 42 | 1 | 0 | 3.896299  | 2.021546  | -0.334553 |
| 43 | 1 | 0 | 4.636575  | 0.556325  | -1.008314 |
| 44 | 1 | 0 | 3.061663  | 1.123022  | -1.626793 |

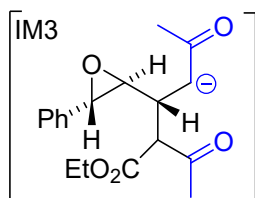

| Center Number | Atomic Number | Atomic Type | Coordinates (Angstroms) |           |           |
|---------------|---------------|-------------|-------------------------|-----------|-----------|
|               |               |             | X                       | Y         | Z         |
| 1             | 6             | 0           | -4.019275               | -0.694744 | -0.710374 |

|    |   |   |           |           |           |
|----|---|---|-----------|-----------|-----------|
| 2  | 6 | 0 | -2.806384 | -1.047723 | -0.130426 |
| 3  | 6 | 0 | -2.296546 | -0.307150 | 0.940651  |
| 4  | 6 | 0 | -3.017594 | 0.785835  | 1.421344  |
| 5  | 6 | 0 | -4.233533 | 1.135586  | 0.840155  |
| 6  | 6 | 0 | -4.739665 | 0.397470  | -0.226897 |
| 7  | 1 | 0 | -4.402642 | -1.269817 | -1.550422 |
| 8  | 1 | 0 | -2.217794 | -1.875089 | -0.519328 |
| 9  | 1 | 0 | -2.601454 | 1.352014  | 2.249826  |
| 10 | 1 | 0 | -4.787561 | 1.991040  | 1.220719  |
| 11 | 1 | 0 | -5.687174 | 0.673742  | -0.683694 |
| 12 | 6 | 0 | -0.970990 | -0.660818 | 1.497817  |
| 13 | 1 | 0 | -0.766799 | -1.729003 | 1.567357  |
| 14 | 6 | 0 | 0.171458  | 0.234571  | 1.290031  |
| 15 | 1 | 0 | -0.017205 | 1.181535  | 0.792653  |
| 16 | 6 | 0 | 1.599586  | -0.251048 | 1.180861  |
| 17 | 1 | 0 | 1.715327  | -1.010723 | 1.969427  |
| 18 | 6 | 0 | 1.887485  | -0.988900 | -0.194833 |
| 19 | 1 | 0 | 2.971924  | -0.939745 | -0.317728 |
| 20 | 6 | 0 | 1.331359  | -0.404285 | -1.474550 |
| 21 | 8 | 0 | 1.959368  | -0.399796 | -2.512053 |
| 22 | 8 | 0 | 0.023574  | -0.113287 | -1.381650 |
| 23 | 6 | 0 | -0.564688 | 0.599478  | -2.465760 |
| 24 | 1 | 0 | 0.140625  | 0.606523  | -3.300766 |
| 25 | 1 | 0 | -1.460598 | 0.037619  | -2.754332 |
| 26 | 6 | 0 | -0.908717 | 2.000331  | -2.002849 |
| 27 | 1 | 0 | -0.000974 | 2.477612  | -1.619284 |
| 28 | 1 | 0 | -1.321903 | 2.585336  | -2.834734 |
| 29 | 1 | 0 | -1.655291 | 1.964277  | -1.201689 |
| 30 | 8 | 0 | -0.459118 | 0.113437  | 2.576907  |
| 31 | 6 | 0 | 2.631038  | 1.879199  | 0.495180  |
| 32 | 8 | 0 | 1.944560  | 1.911663  | -0.579520 |
| 33 | 6 | 0 | 2.562458  | 0.864777  | 1.424170  |
| 34 | 1 | 0 | 3.164505  | 0.863047  | 2.328043  |
| 35 | 6 | 0 | 1.499697  | -2.443844 | -0.057935 |
| 36 | 8 | 0 | 0.400597  | -2.899979 | -0.319705 |
| 37 | 6 | 0 | 3.585504  | 3.041481  | 0.737551  |
| 38 | 1 | 0 | 3.021639  | 3.983415  | 0.749458  |
| 39 | 1 | 0 | 4.143556  | 2.952893  | 1.677532  |
| 40 | 1 | 0 | 4.298198  | 3.112227  | -0.094385 |
| 41 | 6 | 0 | 2.599011  | -3.338861 | 0.479196  |
| 42 | 1 | 0 | 3.346741  | -3.490324 | -0.309680 |
| 43 | 1 | 0 | 3.115795  | -2.864940 | 1.321237  |
| 44 | 1 | 0 | 2.188018  | -4.306066 | 0.777962  |

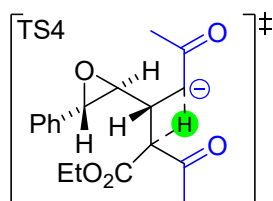

| Center Number | Atomic Number | Atomic Type | Coordinates (Angstroms) |           |           |
|---------------|---------------|-------------|-------------------------|-----------|-----------|
|               |               |             | X                       | Y         | Z         |
| 1             | 6             | 0           | -4.514636               | 0.385329  | -0.222873 |
| 2             | 6             | 0           | -3.241913               | 0.297401  | -0.777933 |
| 3             | 6             | 0           | -2.518077               | -0.895774 | -0.710196 |
| 4             | 6             | 0           | -3.099190               | -2.007706 | -0.096680 |
| 5             | 6             | 0           | -4.372883               | -1.920835 | 0.453473  |
| 6             | 6             | 0           | -5.085224               | -0.724063 | 0.396703  |
| 7             | 1             | 0           | -5.064814               | 1.321876  | -0.278840 |
| 8             | 1             | 0           | -2.792985               | 1.160076  | -1.265847 |
| 9             | 1             | 0           | -2.535878               | -2.936192 | -0.070956 |
| 10            | 1             | 0           | -4.814588               | -2.793262 | 0.929356  |
| 11            | 1             | 0           | -6.080726               | -0.658057 | 0.828753  |
| 12            | 6             | 0           | -1.144644               | -0.952663 | -1.257217 |
| 13            | 1             | 0           | -0.912956               | -0.225481 | -2.039259 |
| 14            | 6             | 0           | 0.003055                | -1.395339 | -0.443286 |
| 15            | 1             | 0           | -0.208660               | -1.734599 | 0.570486  |
| 16            | 6             | 0           | 1.363217                | -0.804341 | -0.727502 |
| 17            | 1             | 0           | 1.379402                | -0.716051 | -1.819478 |
| 18            | 6             | 0           | 1.470440                | 0.676305  | -0.226844 |
| 19            | 1             | 0           | 2.374327                | 0.735414  | 0.403484  |
| 20            | 6             | 0           | 0.313206                | 1.144395  | 0.613178  |
| 21            | 8             | 0           | -0.080590               | 0.621967  | 1.633754  |
| 22            | 8             | 0           | -0.256195               | 2.273879  | 0.128056  |
| 23            | 6             | 0           | -1.320930               | 2.818475  | 0.910761  |
| 24            | 1             | 0           | -1.890998               | 3.433340  | 0.208278  |
| 25            | 1             | 0           | -1.953490               | 2.001609  | 1.268358  |
| 26            | 6             | 0           | -0.788010               | 3.645823  | 2.062295  |
| 27            | 1             | 0           | -0.236973               | 3.007998  | 2.758142  |
| 28            | 1             | 0           | -0.118963               | 4.431436  | 1.695842  |
| 29            | 1             | 0           | -1.614767               | 4.118664  | 2.604804  |
| 30            | 8             | 0           | -0.556041               | -2.235075 | -1.452110 |
| 31            | 6             | 0           | 2.693339                | -2.312508 | 0.949251  |
| 32            | 8             | 0           | 3.145597                | -3.448682 | 1.110225  |
| 33            | 6             | 0           | 2.559748                | -1.684102 | -0.362871 |
| 34            | 1             | 0           | 2.726605                | -2.436757 | -1.138911 |
| 35            | 6             | 0           | 1.716472                | 1.628760  | -1.401903 |



|    |   |   |          |           |           |
|----|---|---|----------|-----------|-----------|
| 36 | 8 | 0 | 1.167223 | 1.481995  | -2.477585 |
| 37 | 6 | 0 | 2.456370 | -1.436433 | 2.170807  |
| 38 | 1 | 0 | 3.195835 | -0.624771 | 2.140266  |
| 39 | 1 | 0 | 1.468970 | -0.963635 | 2.180424  |
| 40 | 1 | 0 | 2.598064 | -2.032491 | 3.076476  |
| 41 | 6 | 0 | 2.739678 | 2.689302  | -1.138922 |
| 42 | 1 | 0 | 2.844898 | 3.353918  | -1.999880 |
| 43 | 1 | 0 | 2.469744 | 3.262706  | -0.243484 |
| 44 | 1 | 0 | 3.671523 | 2.138533  | -0.904203 |
| 45 | 8 | 0 | 4.271523 | 0.312280  | -0.189832 |
| 46 | 1 | 0 | 5.041910 | -0.028799 | 0.284062  |
| 47 | 1 | 0 | 3.542276 | -0.778537 | -0.349376 |

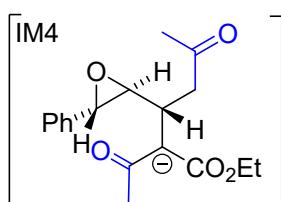

| Center Number | Atomic Number | Atomic Type | Coordinates (Angstroms) |           |           |
|---------------|---------------|-------------|-------------------------|-----------|-----------|
|               |               |             | X                       | Y         | Z         |
| 1             | 6             | 0           | 4.366021                | 0.404569  | 0.088682  |
| 2             | 6             | 0           | 3.079885                | 0.217669  | -0.405773 |
| 3             | 6             | 0           | 2.159797                | 1.269328  | -0.402645 |
| 4             | 6             | 0           | 2.552380                | 2.513224  | 0.093994  |
| 5             | 6             | 0           | 3.840499                | 2.700920  | 0.584498  |
| 6             | 6             | 0           | 4.752627                | 1.648031  | 0.584930  |
| 7             | 1             | 0           | 5.070048                | -0.424310 | 0.086932  |
| 8             | 1             | 0           | 2.773039                | -0.753793 | -0.787402 |
| 9             | 1             | 0           | 1.829884                | 3.324097  | 0.078196  |
| 10            | 1             | 0           | 4.135300                | 3.675369  | 0.967607  |
| 11            | 1             | 0           | 5.759103                | 1.794901  | 0.969467  |
| 12            | 6             | 0           | 0.783436                | 1.042528  | -0.903295 |
| 13            | 1             | 0           | 0.686351                | 0.317703  | -1.713273 |
| 14            | 6             | 0           | -0.389048               | 1.171167  | -0.030574 |
| 15            | 1             | 0           | -0.222777               | 1.484639  | 0.999536  |
| 16            | 6             | 0           | -1.562568               | 0.259231  | -0.273199 |
| 17            | 1             | 0           | -1.612232               | 0.090675  | -1.354104 |
| 18            | 6             | 0           | -1.249628               | -1.075990 | 0.377295  |
| 19            | 1             | 0           | -2.886244               | 0.913488  | 1.275354  |
| 20            | 6             | 0           | -0.797559               | -2.068325 | -0.533745 |
| 21            | 8             | 0           | -0.640681               | -1.927675 | -1.754343 |
| 22            | 8             | 0           | -0.493177               | -3.297576 | 0.032984  |

|    |   |   |           |           |           |
|----|---|---|-----------|-----------|-----------|
| 23 | 6 | 0 | 0.075530  | -4.241272 | -0.851422 |
| 24 | 1 | 0 | -0.082532 | -5.214394 | -0.371468 |
| 25 | 1 | 0 | -0.455348 | -4.221739 | -1.808537 |
| 26 | 6 | 0 | 1.556247  | -3.985504 | -1.073243 |
| 27 | 1 | 0 | 2.087329  | -3.948874 | -0.115558 |
| 28 | 1 | 0 | 2.003311  | -4.774645 | -1.690960 |
| 29 | 1 | 0 | 1.680962  | -3.027548 | -1.585262 |
| 30 | 8 | 0 | -0.071749 | 2.177933  | -1.014296 |
| 31 | 6 | 0 | -3.341778 | 2.129481  | -0.442034 |
| 32 | 8 | 0 | -4.157513 | 2.185664  | -1.346161 |
| 33 | 6 | 0 | -2.929000 | 0.821757  | 0.184423  |
| 34 | 1 | 0 | -3.687806 | 0.080216  | -0.083494 |
| 35 | 6 | 0 | -1.238622 | -1.138191 | 1.800640  |
| 36 | 8 | 0 | -1.449325 | -0.130126 | 2.514961  |
| 37 | 6 | 0 | -2.724383 | 3.398931  | 0.109501  |
| 38 | 1 | 0 | -2.677124 | 3.374520  | 1.203554  |
| 39 | 1 | 0 | -1.696715 | 3.489188  | -0.259426 |
| 40 | 1 | 0 | -3.302456 | 4.262270  | -0.230045 |
| 41 | 6 | 0 | -0.969160 | -2.439961 | 2.548341  |
| 42 | 1 | 0 | -1.616571 | -3.254031 | 2.209982  |
| 43 | 1 | 0 | 0.060089  | -2.780378 | 2.394963  |
| 44 | 1 | 0 | -1.134105 | -2.238675 | 3.610540  |

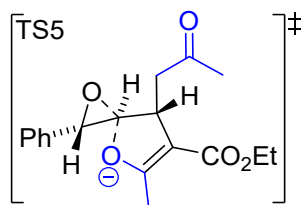

| Center Number | Atomic Number | Atomic Type | Coordinates (Angstroms) |           |           |
|---------------|---------------|-------------|-------------------------|-----------|-----------|
|               |               |             | X                       | Y         | Z         |
| 1             | 6             | 0           | 4.497543                | -2.109250 | 0.652410  |
| 2             | 6             | 0           | 3.293832                | -1.665879 | 0.114368  |
| 3             | 6             | 0           | 3.225467                | -0.438099 | -0.548221 |
| 4             | 6             | 0           | 4.377031                | 0.337022  | -0.660568 |
| 5             | 6             | 0           | 5.585655                | -0.107823 | -0.130036 |
| 6             | 6             | 0           | 5.650923                | -1.333785 | 0.527735  |
| 7             | 1             | 0           | 4.538989                | -3.062870 | 1.175756  |
| 8             | 1             | 0           | 2.386800                | -2.253912 | 0.230686  |
| 9             | 1             | 0           | 4.271743                | 1.289120  | -1.174374 |
| 10            | 1             | 0           | 6.480888                | 0.504296  | -0.226605 |
| 11            | 1             | 0           | 6.592578                | -1.683218 | 0.946795  |

|    |   |   |           |           |           |
|----|---|---|-----------|-----------|-----------|
| 12 | 6 | 0 | 1.943227  | 0.083672  | -1.162327 |
| 13 | 1 | 0 | 1.515081  | -0.716425 | -1.809386 |
| 14 | 6 | 0 | 0.949651  | 0.638152  | -0.229821 |
| 15 | 1 | 0 | 1.370874  | 1.297494  | 0.519168  |
| 16 | 6 | 0 | -0.440955 | 0.922219  | -0.762960 |
| 17 | 1 | 0 | -0.379096 | 0.843204  | -1.853206 |
| 18 | 6 | 0 | -1.390098 | -0.121704 | -0.225580 |
| 19 | 1 | 0 | -1.816216 | 2.547538  | -1.011905 |
| 20 | 6 | 0 | -2.711948 | -0.194178 | -0.753729 |
| 21 | 8 | 0 | -3.186308 | 0.543518  | -1.613398 |
| 22 | 8 | 0 | -3.490744 | -1.189304 | -0.200617 |
| 23 | 6 | 0 | -4.811894 | -1.253002 | -0.703636 |
| 24 | 1 | 0 | -5.321409 | -0.295053 | -0.541601 |
| 25 | 1 | 0 | -4.793672 | -1.418789 | -1.787753 |
| 26 | 6 | 0 | -5.511964 | -2.383253 | 0.018955  |
| 27 | 1 | 0 | -4.994353 | -3.332286 | -0.155861 |
| 28 | 1 | 0 | -5.526852 | -2.200664 | 1.098630  |
| 29 | 1 | 0 | -6.545891 | -2.482036 | -0.330805 |
| 30 | 8 | 0 | 1.994060  | 1.331803  | -1.706055 |
| 31 | 6 | 0 | -0.985223 | 2.754755  | 0.956189  |
| 32 | 8 | 0 | -0.087211 | 3.302665  | 1.570864  |
| 33 | 6 | 0 | -0.859014 | 2.393374  | -0.501995 |
| 34 | 1 | 0 | -0.083823 | 3.022573  | -0.948095 |
| 35 | 6 | 0 | -0.795388 | -0.918732 | 0.742453  |
| 36 | 8 | 0 | 0.421818  | -0.667980 | 1.049971  |
| 37 | 6 | 0 | -2.283114 | 2.391329  | 1.641817  |
| 38 | 1 | 0 | -3.140661 | 2.788600  | 1.086546  |
| 39 | 1 | 0 | -2.388921 | 1.299460  | 1.636083  |
| 40 | 1 | 0 | -2.283017 | 2.767428  | 2.667691  |
| 41 | 6 | 0 | -1.444550 | -2.065388 | 1.475361  |
| 42 | 1 | 0 | -2.328521 | -1.731919 | 2.027133  |
| 43 | 1 | 0 | -1.788248 | -2.832728 | 0.775366  |
| 44 | 1 | 0 | -0.714263 | -2.492000 | 2.167124  |

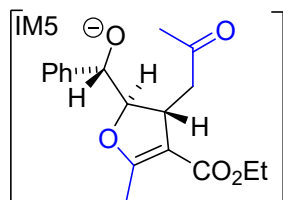

| Center Number | Atomic Number | Atomic Type | Coordinates (Angstroms) |           |           |
|---------------|---------------|-------------|-------------------------|-----------|-----------|
|               |               |             | X                       | Y         | Z         |
| 1             | 6             | 0           | -4.841852               | -1.839826 | -0.390770 |

|    |   |   |           |           |           |
|----|---|---|-----------|-----------|-----------|
| 2  | 6 | 0 | -3.617601 | -1.502653 | 0.181821  |
| 3  | 6 | 0 | -3.328142 | -0.177735 | 0.517888  |
| 4  | 6 | 0 | -4.292360 | 0.799096  | 0.277976  |
| 5  | 6 | 0 | -5.517992 | 0.469173  | -0.293944 |
| 6  | 6 | 0 | -5.798748 | -0.853832 | -0.632294 |
| 7  | 1 | 0 | -5.054172 | -2.876511 | -0.649590 |
| 8  | 1 | 0 | -2.870995 | -2.272414 | 0.366212  |
| 9  | 1 | 0 | -4.011323 | 1.805856  | 0.582034  |
| 10 | 1 | 0 | -6.263284 | 1.243135  | -0.475127 |
| 11 | 1 | 0 | -6.757042 | -1.117845 | -1.076715 |
| 12 | 6 | 0 | -2.005949 | 0.287425  | 1.159154  |
| 13 | 1 | 0 | -1.803280 | -0.469702 | 1.980433  |
| 14 | 6 | 0 | -0.848815 | 0.092943  | 0.161131  |
| 15 | 1 | 0 | -1.073640 | 0.641065  | -0.759407 |
| 16 | 6 | 0 | 0.485767  | 0.549237  | 0.756969  |
| 17 | 1 | 0 | 0.429288  | 0.413070  | 1.848120  |
| 18 | 6 | 0 | 1.452561  | -0.452842 | 0.168614  |
| 19 | 1 | 0 | 1.457385  | 2.418774  | 1.266075  |
| 20 | 6 | 0 | 2.877800  | -0.276551 | 0.214117  |
| 21 | 8 | 0 | 3.447721  | 0.691489  | 0.698304  |
| 22 | 8 | 0 | 3.593409  | -1.294788 | -0.361989 |
| 23 | 6 | 0 | 5.005078  | -1.132795 | -0.342321 |
| 24 | 1 | 0 | 5.371605  | -1.755250 | -1.165152 |
| 25 | 1 | 0 | 5.251591  | -0.086508 | -0.545568 |
| 26 | 6 | 0 | 5.599699  | -1.570888 | 0.982122  |
| 27 | 1 | 0 | 5.235773  | -0.921615 | 1.782489  |
| 28 | 1 | 0 | 5.316872  | -2.604357 | 1.209084  |
| 29 | 1 | 0 | 6.694118  | -1.509161 | 0.951539  |
| 30 | 6 | 0 | 1.175677  | 2.442628  | -0.833497 |
| 31 | 8 | 0 | 0.962522  | 1.798673  | -1.845076 |
| 32 | 6 | 0 | 0.735460  | 2.034037  | 0.538249  |
| 33 | 1 | 0 | -0.252995 | 2.481288  | 0.775136  |
| 34 | 6 | 0 | 0.719795  | -1.484443 | -0.332842 |
| 35 | 8 | 0 | -0.597248 | -1.297154 | -0.265689 |
| 36 | 6 | 0 | 1.940927  | 3.750914  | -0.900730 |
| 37 | 1 | 0 | 1.452437  | 4.527133  | -0.300517 |
| 38 | 1 | 0 | 2.937854  | 3.585937  | -0.473021 |
| 39 | 1 | 0 | 2.038954  | 4.078432  | -1.938537 |
| 40 | 6 | 0 | 1.108206  | -2.788777 | -0.932094 |
| 41 | 1 | 0 | 0.834734  | -2.798466 | -1.993992 |
| 42 | 1 | 0 | 2.176656  | -2.969589 | -0.833185 |
| 43 | 1 | 0 | 0.539893  | -3.589919 | -0.446055 |
| 44 | 8 | 0 | -1.999840 | 1.565028  | 1.536758  |

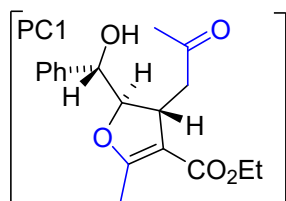

| Center Number | Atomic Number | Atomic Type | Coordinates (Angstroms) |           |           |
|---------------|---------------|-------------|-------------------------|-----------|-----------|
|               |               |             | X                       | Y         | Z         |
| 1             | 6             | 0           | 4.732198                | -1.920043 | 0.383511  |
| 2             | 6             | 0           | 3.516793                | -1.614341 | -0.219157 |
| 3             | 6             | 0           | 3.213853                | -0.299621 | -0.573424 |
| 4             | 6             | 0           | 4.145625                | 0.707414  | -0.315924 |
| 5             | 6             | 0           | 5.363973                | 0.402464  | 0.282809  |
| 6             | 6             | 0           | 5.659937                | -0.911842 | 0.634103  |
| 7             | 1             | 0           | 4.958296                | -2.947756 | 0.654579  |
| 8             | 1             | 0           | 2.790519                | -2.399863 | -0.413214 |
| 9             | 1             | 0           | 3.906104                | 1.730759  | -0.592167 |
| 10            | 1             | 0           | 6.083325                | 1.193418  | 0.477391  |
| 11            | 1             | 0           | 6.611581                | -1.150689 | 1.100923  |
| 12            | 6             | 0           | 1.881958                | 0.040866  | -1.195278 |
| 13            | 1             | 0           | 1.488246                | -0.849199 | -1.715617 |
| 14            | 6             | 0           | 0.845200                | 0.457458  | -0.155827 |
| 15            | 1             | 0           | 1.219951                | 1.314049  | 0.408960  |
| 16            | 6             | 0           | -0.544825               | 0.727737  | -0.767317 |
| 17            | 1             | 0           | -0.514748               | 0.521764  | -1.845269 |
| 18            | 6             | 0           | -1.391273               | -0.302266 | -0.054743 |
| 19            | 1             | 0           | -1.914895               | 2.316308  | -1.243960 |
| 20            | 6             | 0           | -2.815681               | -0.400603 | -0.301936 |
| 21            | 8             | 0           | -3.425360               | 0.362388  | -1.034491 |
| 22            | 8             | 0           | -3.426339               | -1.411520 | 0.357757  |
| 23            | 6             | 0           | -4.836667               | -1.533826 | 0.143027  |
| 24            | 1             | 0           | -5.202034               | -2.065230 | 1.025758  |
| 25            | 1             | 0           | -5.280158               | -0.534979 | 0.113653  |
| 26            | 6             | 0           | -5.137490               | -2.298632 | -1.128430 |
| 27            | 1             | 0           | -4.782591               | -1.740337 | -1.998525 |
| 28            | 1             | 0           | -4.653269               | -3.280235 | -1.113584 |
| 29            | 1             | 0           | -6.217806               | -2.448554 | -1.230713 |
| 30            | 6             | 0           | -1.339698               | 2.578230  | 0.807070  |
| 31            | 8             | 0           | -0.692228               | 2.169149  | 1.750266  |
| 32            | 6             | 0           | -1.029518               | 2.171507  | -0.619964 |
| 33            | 1             | 0           | -0.250031               | 2.847484  | -1.001233 |
| 34            | 6             | 0           | -0.606385               | -1.002163 | 0.797972  |
| 35            | 8             | 0           | 0.683371                | -0.625162 | 0.778691  |

|    |   |   |           |           |           |
|----|---|---|-----------|-----------|-----------|
| 36 | 6 | 0 | -2.511542 | 3.508421  | 0.986605  |
| 37 | 1 | 0 | -2.421145 | 4.380614  | 0.328132  |
| 38 | 1 | 0 | -3.424860 | 2.979546  | 0.685519  |
| 39 | 1 | 0 | -2.590984 | 3.827650  | 2.027338  |
| 40 | 6 | 0 | -0.886914 | -2.091566 | 1.762984  |
| 41 | 1 | 0 | -0.675633 | -1.733284 | 2.776884  |
| 42 | 1 | 0 | -1.922470 | -2.417220 | 1.696601  |
| 43 | 1 | 0 | -0.214506 | -2.934979 | 1.571355  |
| 44 | 8 | 0 | 1.958874  | 1.144850  | -2.076888 |
| 45 | 1 | 0 | 2.663289  | 0.957921  | -2.711979 |

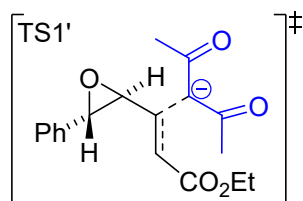

| Center Number | Atomic Number | Atomic Type | Coordinates (Angstroms) |           |           |
|---------------|---------------|-------------|-------------------------|-----------|-----------|
|               |               |             | X                       | Y         | Z         |
| 1             | 6             | 0           | -4.966319               | 0.800813  | -0.348994 |
| 2             | 6             | 0           | -3.625645               | 0.663383  | -0.692142 |
| 3             | 6             | 0           | -3.003436               | -0.585608 | -0.598994 |
| 4             | 6             | 0           | -3.738597               | -1.688324 | -0.162761 |
| 5             | 6             | 0           | -5.080694               | -1.546700 | 0.177311  |
| 6             | 6             | 0           | -5.699608               | -0.302532 | 0.084701  |
| 7             | 1             | 0           | -5.441030               | 1.776953  | -0.416178 |
| 8             | 1             | 0           | -3.033036               | 1.519414  | -1.005118 |
| 9             | 1             | 0           | -3.239317               | -2.651356 | -0.105608 |
| 10            | 1             | 0           | -5.646629               | -2.412296 | 0.514337  |
| 11            | 1             | 0           | -6.748057               | -0.191869 | 0.351477  |
| 12            | 6             | 0           | -1.566387               | -0.720563 | -0.948193 |
| 13            | 1             | 0           | -1.232740               | -0.100603 | -1.779432 |
| 14            | 6             | 0           | -0.548450               | -1.079645 | 0.051076  |
| 15            | 1             | 0           | -0.898923               | -1.296983 | 1.062226  |
| 16            | 6             | 0           | 0.875025                | -0.646641 | -0.063720 |
| 17            | 1             | 0           | 1.150494                | -0.480393 | -1.105786 |
| 18            | 6             | 0           | 1.815794                | -1.412472 | 0.669903  |
| 19            | 1             | 0           | 1.526588                | -1.892396 | 1.598499  |
| 20            | 6             | 0           | 3.192476                | -1.416971 | 0.369229  |
| 21            | 8             | 0           | 4.103182                | -2.025950 | 0.930491  |
| 22            | 8             | 0           | 3.491177                | -0.596463 | -0.735739 |
| 23            | 6             | 0           | 4.859310                | -0.529758 | -1.073905 |
| 24            | 1             | 0           | 5.321335                | -1.512407 | -0.931954 |

|    |   |   |           |           |           |
|----|---|---|-----------|-----------|-----------|
| 25 | 1 | 0 | 4.891081  | -0.266811 | -2.138635 |
| 26 | 6 | 0 | 5.586531  | 0.509083  | -0.238512 |
| 27 | 1 | 0 | 5.106566  | 1.489109  | -0.339969 |
| 28 | 1 | 0 | 5.553436  | 0.209245  | 0.812297  |
| 29 | 1 | 0 | 6.635821  | 0.600461  | -0.547572 |
| 30 | 8 | 0 | -1.008197 | -2.027939 | -0.920529 |
| 31 | 6 | 0 | 0.226202  | 1.264795  | 1.787907  |
| 32 | 8 | 0 | 0.844654  | 0.965270  | 2.804616  |
| 33 | 6 | 0 | 0.889795  | 1.183933  | 0.473378  |
| 34 | 1 | 0 | 1.970139  | 1.220957  | 0.596019  |
| 35 | 6 | 0 | 0.437181  | 1.960856  | -0.676207 |
| 36 | 8 | 0 | -0.730072 | 2.276027  | -0.929900 |
| 37 | 6 | 0 | -1.227178 | 1.677502  | 1.885423  |
| 38 | 1 | 0 | -1.486650 | 1.770541  | 2.943211  |
| 39 | 1 | 0 | -1.409692 | 2.613640  | 1.350082  |
| 40 | 1 | 0 | -1.882008 | 0.937835  | 1.413914  |
| 41 | 6 | 0 | 1.539257  | 2.318006  | -1.660543 |
| 42 | 1 | 0 | 2.206057  | 1.463709  | -1.825475 |
| 43 | 1 | 0 | 1.102285  | 2.656163  | -2.603695 |
| 44 | 1 | 0 | 2.156792  | 3.124600  | -1.243900 |

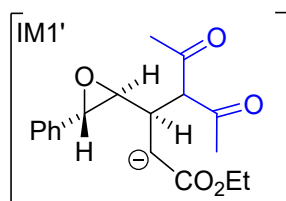

| Center Number | Atomic Number | Atomic Type | Coordinates (Angstroms) |           |           |
|---------------|---------------|-------------|-------------------------|-----------|-----------|
|               |               |             | X                       | Y         | Z         |
| 1             | 6             | 0           | -5.294893               | 0.813519  | 0.086455  |
| 2             | 6             | 0           | -3.961993               | 0.756322  | -0.305499 |
| 3             | 6             | 0           | -3.302313               | -0.474659 | -0.369289 |
| 4             | 6             | 0           | -3.992918               | -1.639678 | -0.033451 |
| 5             | 6             | 0           | -5.327878               | -1.578762 | 0.355577  |
| 6             | 6             | 0           | -5.984871               | -0.352518 | 0.414288  |
| 7             | 1             | 0           | -5.796809               | 1.776604  | 0.143202  |
| 8             | 1             | 0           | -3.409895               | 1.667004  | -0.522772 |
| 9             | 1             | 0           | -3.462554               | -2.585886 | -0.088648 |
| 10            | 1             | 0           | -5.857749               | -2.493487 | 0.611819  |
| 11            | 1             | 0           | -7.027830               | -0.303842 | 0.718514  |
| 12            | 6             | 0           | -1.874501               | -0.541267 | -0.778448 |
| 13            | 1             | 0           | -1.606264               | 0.077601  | -1.636623 |
| 14            | 6             | 0           | -0.808297               | -0.866372 | 0.184856  |

|    |   |   |           |           |           |
|----|---|---|-----------|-----------|-----------|
| 15 | 1 | 0 | -1.143613 | -1.083619 | 1.202884  |
| 16 | 6 | 0 | 0.624015  | -0.398946 | 0.083609  |
| 17 | 1 | 0 | 0.898217  | -0.312997 | -0.973661 |
| 18 | 6 | 0 | 1.498781  | -1.374479 | 0.762107  |
| 19 | 1 | 0 | 1.108752  | -1.937593 | 1.604910  |
| 20 | 6 | 0 | 2.779714  | -1.699629 | 0.318804  |
| 21 | 8 | 0 | 3.584450  | -2.532910 | 0.756033  |
| 22 | 8 | 0 | 3.152124  | -0.895161 | -0.786043 |
| 23 | 6 | 0 | 4.485543  | -1.038544 | -1.210062 |
| 24 | 1 | 0 | 4.797908  | -2.081976 | -1.092101 |
| 25 | 1 | 0 | 4.495452  | -0.775795 | -2.275938 |
| 26 | 6 | 0 | 5.412567  | -0.124194 | -0.426532 |
| 27 | 1 | 0 | 5.421267  | -0.440973 | 0.620974  |
| 28 | 1 | 0 | 6.439094  | -0.168915 | -0.814289 |
| 29 | 1 | 0 | 5.055954  | 0.910153  | -0.479504 |
| 30 | 8 | 0 | -1.259482 | -1.821744 | -0.771649 |
| 31 | 6 | 0 | -0.312522 | 2.017780  | -0.083749 |
| 32 | 8 | 0 | -1.327595 | 2.436630  | 0.456790  |
| 33 | 6 | 0 | 0.650224  | 1.132529  | 0.660580  |
| 34 | 1 | 0 | 0.278682  | 1.061544  | 1.689483  |
| 35 | 6 | 0 | 2.066385  | 1.670797  | 0.694422  |
| 36 | 8 | 0 | 2.554169  | 2.365748  | -0.183355 |
| 37 | 6 | 0 | -0.009849 | 2.351086  | -1.522026 |
| 38 | 1 | 0 | -0.875725 | 2.840215  | -1.975638 |
| 39 | 1 | 0 | 0.870854  | 3.000597  | -1.547529 |
| 40 | 1 | 0 | 0.269698  | 1.456599  | -2.089165 |
| 41 | 6 | 0 | 2.837113  | 1.267491  | 1.915596  |
| 42 | 1 | 0 | 2.362065  | 1.677192  | 2.815618  |
| 43 | 1 | 0 | 2.774813  | 0.167876  | 1.984992  |
| 44 | 1 | 0 | 3.872542  | 1.606344  | 1.845833  |

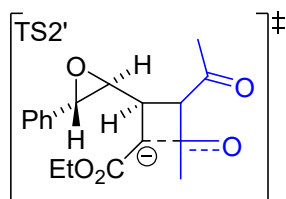

| Center Number | Atomic Number | Atomic Type | Coordinates (Angstroms) |           |           |
|---------------|---------------|-------------|-------------------------|-----------|-----------|
|               |               |             | X                       | Y         | Z         |
| 1             | 6             | 0           | -5.282261               | 0.755593  | 0.066159  |
| 2             | 6             | 0           | -3.947286               | 0.669977  | -0.312325 |
| 3             | 6             | 0           | -3.306162               | -0.572396 | -0.341540 |
| 4             | 6             | 0           | -4.013003               | -1.720111 | 0.015477  |



|    |   |   |           |           |           |
|----|---|---|-----------|-----------|-----------|
| 5  | 6 | 0 | -5.350358 | -1.630429 | 0.391664  |
| 6  | 6 | 0 | -5.989992 | -0.393853 | 0.415867  |
| 7  | 1 | 0 | -5.771805 | 1.726082  | 0.094612  |
| 8  | 1 | 0 | -3.381109 | 1.566505  | -0.557875 |
| 9  | 1 | 0 | -3.494974 | -2.674516 | -0.010232 |
| 10 | 1 | 0 | -5.895856 | -2.530696 | 0.665536  |
| 11 | 1 | 0 | -7.034466 | -0.323894 | 0.710167  |
| 12 | 6 | 0 | -1.874880 | -0.641882 | -0.726349 |
| 13 | 1 | 0 | -1.601357 | -0.045262 | -1.599870 |
| 14 | 6 | 0 | -0.816630 | -0.870043 | 0.267522  |
| 15 | 1 | 0 | -1.149423 | -1.057307 | 1.291818  |
| 16 | 6 | 0 | 0.522719  | -0.206173 | 0.127300  |
| 17 | 1 | 0 | 0.875217  | -0.312980 | -0.902655 |
| 18 | 6 | 0 | 1.635714  | -0.616915 | 1.063710  |
| 19 | 1 | 0 | 1.360979  | -0.760953 | 2.107769  |
| 20 | 6 | 0 | 2.791575  | -1.349179 | 0.667941  |
| 21 | 8 | 0 | 3.655757  | -1.817914 | 1.406502  |
| 22 | 8 | 0 | 2.936643  | -1.386135 | -0.702140 |
| 23 | 6 | 0 | 4.222060  | -1.754128 | -1.164216 |
| 24 | 1 | 0 | 4.594450  | -2.602127 | -0.578759 |
| 25 | 1 | 0 | 4.073582  | -2.073783 | -2.202467 |
| 26 | 6 | 0 | 5.186020  | -0.584533 | -1.085274 |
| 27 | 1 | 0 | 5.353700  | -0.322398 | -0.037915 |
| 28 | 1 | 0 | 6.147520  | -0.838436 | -1.551133 |
| 29 | 1 | 0 | 4.754987  | 0.291425  | -1.577292 |
| 30 | 8 | 0 | -1.213119 | -1.896458 | -0.648300 |
| 31 | 6 | 0 | -0.101480 | 2.231033  | -0.511742 |
| 32 | 8 | 0 | -1.066723 | 2.944373  | -0.263940 |
| 33 | 6 | 0 | 0.464785  | 1.284318  | 0.504409  |
| 34 | 1 | 0 | -0.118104 | 1.411145  | 1.425769  |
| 35 | 6 | 0 | 2.018518  | 1.362585  | 0.838906  |
| 36 | 8 | 0 | 2.828054  | 1.646952  | -0.072304 |
| 37 | 6 | 0 | 0.572967  | 2.256901  | -1.857571 |
| 38 | 1 | 0 | 0.239918  | 3.128749  | -2.426417 |
| 39 | 1 | 0 | 1.659003  | 2.235144  | -1.687413 |
| 40 | 1 | 0 | 0.327320  | 1.347005  | -2.420337 |
| 41 | 6 | 0 | 2.359069  | 1.802471  | 2.256609  |
| 42 | 1 | 0 | 1.639043  | 1.452374  | 3.002773  |
| 43 | 1 | 0 | 3.351421  | 1.416341  | 2.507871  |
| 44 | 1 | 0 | 2.396817  | 2.901626  | 2.288220  |

---

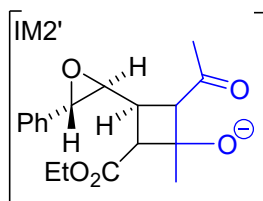

| Center Number | Atomic Number | Atomic Type | Coordinates (Angstroms) |           |           |
|---------------|---------------|-------------|-------------------------|-----------|-----------|
|               |               |             | X                       | Y         | Z         |
| 1             | 6             | 0           | -5.235826               | 0.802359  | 0.048648  |
| 2             | 6             | 0           | -3.900103               | 0.677129  | -0.315350 |
| 3             | 6             | 0           | -3.299455               | -0.585354 | -0.348089 |
| 4             | 6             | 0           | -4.045293               | -1.712816 | -0.008379 |
| 5             | 6             | 0           | -5.383769               | -1.583408 | 0.352951  |
| 6             | 6             | 0           | -5.983615               | -0.327247 | 0.379867  |
| 7             | 1             | 0           | -5.694277               | 1.787692  | 0.080677  |
| 8             | 1             | 0           | -3.301826               | 1.557128  | -0.546117 |
| 9             | 1             | 0           | -3.557263               | -2.682959 | -0.033480 |
| 10            | 1             | 0           | -5.960970               | -2.467696 | 0.613554  |
| 11            | 1             | 0           | -7.028662               | -0.226376 | 0.662853  |
| 12            | 6             | 0           | -1.866865               | -0.689796 | -0.718891 |
| 13            | 1             | 0           | -1.575320               | -0.120577 | -1.605088 |
| 14            | 6             | 0           | -0.821154               | -0.887347 | 0.290817  |
| 15            | 1             | 0           | -1.161759               | -1.037255 | 1.318523  |
| 16            | 6             | 0           | 0.495137                | -0.197135 | 0.123829  |
| 17            | 1             | 0           | 0.868933                | -0.341319 | -0.892680 |
| 18            | 6             | 0           | 1.633473                | -0.427811 | 1.110033  |
| 19            | 1             | 0           | 1.293835                | -0.604647 | 2.134717  |
| 20            | 6             | 0           | 2.791376                | -1.278356 | 0.802040  |
| 21            | 8             | 0           | 3.640147                | -1.610024 | 1.609481  |
| 22            | 8             | 0           | 2.883798                | -1.558815 | -0.520967 |
| 23            | 6             | 0           | 4.179743                | -1.900077 | -1.000150 |
| 24            | 1             | 0           | 4.763791                | -2.314222 | -0.173111 |
| 25            | 1             | 0           | 4.031228                | -2.678281 | -1.757615 |
| 26            | 6             | 0           | 4.832426                | -0.659568 | -1.579212 |
| 27            | 1             | 0           | 4.795453                | 0.145045  | -0.838537 |
| 28            | 1             | 0           | 5.868923                | -0.867250 | -1.874991 |
| 29            | 1             | 0           | 4.278060                | -0.307464 | -2.454974 |
| 30            | 8             | 0           | -1.215212               | -1.946293 | -0.593095 |
| 31            | 6             | 0           | 0.014323                | 2.280201  | -0.573901 |
| 32            | 8             | 0           | -0.850168               | 3.131769  | -0.373863 |
| 33            | 6             | 0           | 0.421058                | 1.300200  | 0.464382  |
| 34            | 1             | 0           | -0.200215               | 1.457913  | 1.355193  |
| 35            | 6             | 0           | 2.019838                | 1.186851  | 0.901405  |

|    |   |   |          |          |           |
|----|---|---|----------|----------|-----------|
| 36 | 8 | 0 | 2.891260 | 1.430682 | -0.019719 |
| 37 | 6 | 0 | 0.794670 | 2.218124 | -1.856290 |
| 38 | 1 | 0 | 0.593460 | 3.102326 | -2.467052 |
| 39 | 1 | 0 | 1.856431 | 2.110017 | -1.555911 |
| 40 | 1 | 0 | 0.542559 | 1.315990 | -2.428905 |
| 41 | 6 | 0 | 2.293772 | 1.863489 | 2.248217  |
| 42 | 1 | 0 | 1.526613 | 1.661287 | 3.007254  |
| 43 | 1 | 0 | 3.262304 | 1.508992 | 2.619976  |
| 44 | 1 | 0 | 2.361677 | 2.946462 | 2.089451  |

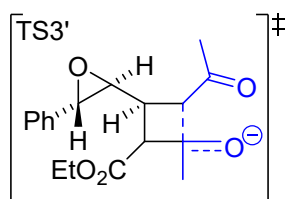

| Center Number | Atomic Number | Atomic Type | Coordinates (Angstroms) |           |           |
|---------------|---------------|-------------|-------------------------|-----------|-----------|
|               |               |             | X                       | Y         | Z         |
| 1             | 6             | 0           | -5.491252               | 0.494040  | -0.508863 |
| 2             | 6             | 0           | -4.135453               | 0.454192  | -0.815797 |
| 3             | 6             | 0           | -3.322927               | -0.559693 | -0.302988 |
| 4             | 6             | 0           | -3.891376               | -1.539031 | 0.513446  |
| 5             | 6             | 0           | -5.248202               | -1.500478 | 0.817460  |
| 6             | 6             | 0           | -6.053541               | -0.484044 | 0.308739  |
| 7             | 1             | 0           | -6.111135               | 1.292833  | -0.908636 |
| 8             | 1             | 0           | -3.694160               | 1.222210  | -1.447169 |
| 9             | 1             | 0           | -3.249354               | -2.329863 | 0.890603  |
| 10            | 1             | 0           | -5.680677               | -2.270177 | 1.452598  |
| 11            | 1             | 0           | -7.113931               | -0.454058 | 0.546934  |
| 12            | 6             | 0           | -1.870937               | -0.577329 | -0.608817 |
| 13            | 1             | 0           | -1.596941               | -0.197948 | -1.596039 |
| 14            | 6             | 0           | -0.852611               | -0.452917 | 0.442481  |
| 15            | 1             | 0           | -1.225623               | -0.395860 | 1.469143  |
| 16            | 6             | 0           | 0.458249                | 0.225805  | 0.184046  |
| 17            | 1             | 0           | 0.741179                | 0.069793  | -0.860592 |
| 18            | 6             | 0           | 1.641635                | -0.196565 | 1.043174  |
| 19            | 1             | 0           | 1.374308                | -0.271859 | 2.102950  |
| 20            | 6             | 0           | 2.468588                | -1.383033 | 0.681809  |
| 21            | 8             | 0           | 3.217687                | -1.966310 | 1.441784  |
| 22            | 8             | 0           | 2.370342                | -1.687092 | -0.626803 |
| 23            | 6             | 0           | 3.362137                | -2.571114 | -1.135684 |
| 24            | 1             | 0           | 3.540513                | -3.373701 | -0.413014 |
| 25            | 1             | 0           | 2.923412                | -2.994816 | -2.044226 |

|    |   |   |           |           |           |
|----|---|---|-----------|-----------|-----------|
| 26 | 6 | 0 | 4.636683  | -1.807386 | -1.436394 |
| 27 | 1 | 0 | 5.064624  | -1.418476 | -0.509115 |
| 28 | 1 | 0 | 5.371995  | -2.459101 | -1.924132 |
| 29 | 1 | 0 | 4.418685  | -0.953148 | -2.082909 |
| 30 | 8 | 0 | -1.129035 | -1.714166 | -0.185904 |
| 31 | 6 | 0 | 0.362477  | 2.775250  | -0.433387 |
| 32 | 8 | 0 | 0.083448  | 3.945179  | -0.124955 |
| 33 | 6 | 0 | 0.463247  | 1.706673  | 0.511829  |
| 34 | 1 | 0 | 0.092625  | 1.958356  | 1.508330  |
| 35 | 6 | 0 | 2.453562  | 1.148654  | 0.791171  |
| 36 | 8 | 0 | 3.162047  | 1.209848  | -0.233756 |
| 37 | 6 | 0 | 0.791499  | 2.457001  | -1.858343 |
| 38 | 1 | 0 | 0.766787  | 3.375060  | -2.451596 |
| 39 | 1 | 0 | 1.811294  | 2.043295  | -1.828049 |
| 40 | 1 | 0 | 0.145958  | 1.705131  | -2.332228 |
| 41 | 6 | 0 | 2.865391  | 1.934933  | 2.023636  |
| 42 | 1 | 0 | 2.121573  | 1.894797  | 2.824649  |
| 43 | 1 | 0 | 3.816450  | 1.530464  | 2.400785  |
| 44 | 1 | 0 | 3.023498  | 2.977658  | 1.733680  |

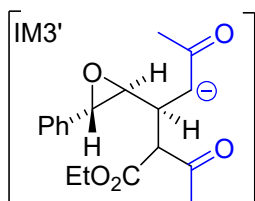

| Center Number | Atomic Number | Atomic Type | Coordinates (Angstroms) |           |           |
|---------------|---------------|-------------|-------------------------|-----------|-----------|
|               |               |             | X                       | Y         | Z         |
| 1             | 6             | 0           | 4.991509                | 0.232610  | -0.969590 |
| 2             | 6             | 0           | 3.821033                | 0.720183  | -0.398961 |
| 3             | 6             | 0           | 3.003556                | -0.119495 | 0.361567  |
| 4             | 6             | 0           | 3.376144                | -1.451431 | 0.545442  |
| 5             | 6             | 0           | 4.549779                | -1.937076 | -0.023053 |
| 6             | 6             | 0           | 5.362031                | -1.097803 | -0.781706 |
| 7             | 1             | 0           | 5.615707                | 0.893114  | -1.566563 |
| 8             | 1             | 0           | 3.519615                | 1.753227  | -0.556523 |
| 9             | 1             | 0           | 2.730693                | -2.088313 | 1.143317  |
| 10            | 1             | 0           | 4.832566                | -2.976396 | 0.128253  |
| 11            | 1             | 0           | 6.278523                | -1.477906 | -1.226564 |
| 12            | 6             | 0           | 1.742492                | 0.405916  | 0.941068  |
| 13            | 1             | 0           | 1.789483                | 1.434201  | 1.306576  |
| 14            | 6             | 0           | 0.431653                | -0.044868 | 0.479100  |
| 15            | 1             | 0           | 0.411122                | -0.835177 | -0.268303 |

|    |   |   |           |           |           |
|----|---|---|-----------|-----------|-----------|
| 16 | 6 | 0 | -0.719146 | 0.931451  | 0.474720  |
| 17 | 1 | 0 | -0.578596 | 1.555436  | 1.365678  |
| 18 | 6 | 0 | -2.120874 | 0.227765  | 0.693399  |
| 19 | 1 | 0 | -2.809446 | 1.044745  | 0.931345  |
| 20 | 6 | 0 | -2.677731 | -0.422370 | -0.547576 |
| 21 | 8 | 0 | -3.824189 | -0.320580 | -0.920401 |
| 22 | 8 | 0 | -1.763791 | -1.185348 | -1.173123 |
| 23 | 6 | 0 | -2.232437 | -1.917679 | -2.302781 |
| 24 | 1 | 0 | -2.919083 | -1.288790 | -2.876357 |
| 25 | 1 | 0 | -1.337470 | -2.111306 | -2.900564 |
| 26 | 6 | 0 | -2.900709 | -3.205622 | -1.865767 |
| 27 | 1 | 0 | -3.797903 | -2.981165 | -1.283664 |
| 28 | 1 | 0 | -3.185683 | -3.804278 | -2.739105 |
| 29 | 1 | 0 | -2.222916 | -3.792686 | -1.238752 |
| 30 | 8 | 0 | 0.976755  | -0.483062 | 1.750369  |
| 31 | 6 | 0 | -0.750704 | 3.157647  | -0.838175 |
| 32 | 8 | 0 | -0.640462 | 3.837679  | -1.889346 |
| 33 | 6 | 0 | -0.666235 | 1.767546  | -0.756116 |
| 34 | 1 | 0 | -0.517400 | 1.238766  | -1.697000 |
| 35 | 6 | 0 | -2.140788 | -0.760155 | 1.842591  |
| 36 | 8 | 0 | -2.332123 | -1.953272 | 1.686828  |
| 37 | 6 | 0 | -1.003278 | 3.983664  | 0.438180  |
| 38 | 1 | 0 | -1.882375 | 4.614352  | 0.259828  |
| 39 | 1 | 0 | -1.171002 | 3.420453  | 1.365247  |
| 40 | 1 | 0 | -0.157304 | 4.665212  | 0.596369  |
| 41 | 6 | 0 | -1.845232 | -0.184552 | 3.208573  |
| 42 | 1 | 0 | -0.760923 | -0.039876 | 3.284026  |
| 43 | 1 | 0 | -2.326396 | 0.788553  | 3.354201  |
| 44 | 1 | 0 | -2.167109 | -0.889886 | 3.978444  |

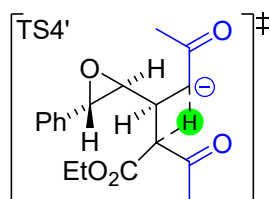

| Center Number | Atomic Number | Atomic Type | Coordinates (Angstroms) |           |           |
|---------------|---------------|-------------|-------------------------|-----------|-----------|
|               |               |             | X                       | Y         | Z         |
| 1             | 6             | 0           | -4.881134               | 0.284009  | -0.946188 |
| 2             | 6             | 0           | -3.711452               | -0.291262 | -0.462829 |
| 3             | 6             | 0           | -2.963215               | 0.369549  | 0.516672  |
| 4             | 6             | 0           | -3.390090               | 1.606772  | 0.995260  |
| 5             | 6             | 0           | -4.563798               | 2.177707  | 0.509684  |

|    |   |   |           |           |           |
|----|---|---|-----------|-----------|-----------|
| 6  | 6 | 0 | -5.314325 | 1.516850  | -0.458848 |
| 7  | 1 | 0 | -5.453733 | -0.229169 | -1.714943 |
| 8  | 1 | 0 | -3.348283 | -1.235819 | -0.864877 |
| 9  | 1 | 0 | -2.785866 | 2.108304  | 1.745787  |
| 10 | 1 | 0 | -4.892834 | 3.142463  | 0.889300  |
| 11 | 1 | 0 | -6.230197 | 1.963076  | -0.839245 |
| 12 | 6 | 0 | -1.710893 | -0.257248 | 1.010929  |
| 13 | 1 | 0 | -1.810951 | -1.297603 | 1.326640  |
| 14 | 6 | 0 | -0.400163 | 0.153613  | 0.506027  |
| 15 | 1 | 0 | -0.382348 | 0.996336  | -0.181126 |
| 16 | 6 | 0 | 0.693256  | -0.868654 | 0.338810  |
| 17 | 1 | 0 | 0.607786  | -1.575154 | 1.173459  |
| 18 | 6 | 0 | 2.145307  | -0.340294 | 0.402481  |
| 19 | 1 | 0 | 2.712229  | -1.317632 | 0.283716  |
| 20 | 6 | 0 | 2.586410  | 0.531979  | -0.741497 |
| 21 | 8 | 0 | 3.606992  | 0.388435  | -1.373471 |
| 22 | 8 | 0 | 1.719893  | 1.544791  | -0.983474 |
| 23 | 6 | 0 | 2.141544  | 2.502477  | -1.951958 |
| 24 | 1 | 0 | 2.641722  | 1.984052  | -2.775028 |
| 25 | 1 | 0 | 1.217994  | 2.958857  | -2.320242 |
| 26 | 6 | 0 | 3.056987  | 3.529343  | -1.316515 |
| 27 | 1 | 0 | 3.957471  | 3.039558  | -0.937768 |
| 28 | 1 | 0 | 3.346938  | 4.291313  | -2.049816 |
| 29 | 1 | 0 | 2.556364  | 4.019377  | -0.475942 |
| 30 | 8 | 0 | -0.843224 | 0.517453  | 1.831266  |
| 31 | 6 | 0 | -0.588079 | -2.649186 | -0.968023 |
| 32 | 8 | 0 | -1.433984 | -2.758701 | -1.858426 |
| 33 | 6 | 0 | 0.484688  | -1.652719 | -0.961025 |
| 34 | 1 | 0 | 0.393384  | -0.985651 | -1.826112 |
| 35 | 6 | 0 | 2.548510  | 0.302277  | 1.697135  |
| 36 | 8 | 0 | 3.204638  | 1.330587  | 1.745746  |
| 37 | 6 | 0 | -0.518883 | -3.701368 | 0.134500  |
| 38 | 1 | 0 | -1.165507 | -4.540737 | -0.134653 |
| 39 | 1 | 0 | 0.523671  | -4.025639 | 0.246036  |
| 40 | 1 | 0 | -0.850402 | -3.308378 | 1.104096  |
| 41 | 6 | 0 | 2.148014  | -0.428450 | 2.958441  |
| 42 | 1 | 0 | 1.075197  | -0.283845 | 3.131600  |
| 43 | 1 | 0 | 2.329054  | -1.504669 | 2.857530  |
| 44 | 1 | 0 | 2.711929  | -0.023010 | 3.801813  |
| 45 | 8 | 0 | 2.669973  | -2.984239 | -0.366560 |
| 46 | 1 | 0 | 1.553127  | -2.356148 | -0.912891 |
| 47 | 1 | 0 | 3.322839  | -2.838868 | -1.066324 |

---

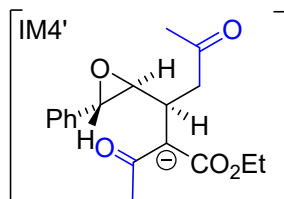

| Center Number | Atomic Number | Atomic Type | Coordinates (Angstroms) |           |           |
|---------------|---------------|-------------|-------------------------|-----------|-----------|
|               |               |             | X                       | Y         | Z         |
| 1             | 6             | 0           | 4.419622                | 0.122509  | 0.812919  |
| 2             | 6             | 0           | 3.130736                | -0.378559 | 0.963214  |
| 3             | 6             | 0           | 2.402113                | -0.810666 | -0.146832 |
| 4             | 6             | 0           | 2.996428                | -0.756565 | -1.409351 |
| 5             | 6             | 0           | 4.286567                | -0.259988 | -1.559984 |
| 6             | 6             | 0           | 5.002292                | 0.186335  | -0.450610 |
| 7             | 1             | 0           | 4.970798                | 0.465277  | 1.685336  |
| 8             | 1             | 0           | 2.671495                | -0.425231 | 1.947891  |
| 9             | 1             | 0           | 2.429148                | -1.119122 | -2.262090 |
| 10            | 1             | 0           | 4.737357                | -0.220654 | -2.548976 |
| 11            | 1             | 0           | 6.009152                | 0.578791  | -0.569877 |
| 12            | 6             | 0           | 1.003773                | -1.270378 | 0.019451  |
| 13            | 1             | 0           | 0.757490                | -1.670520 | 1.002450  |
| 14            | 6             | 0           | -0.078199               | -0.666220 | -0.764272 |
| 15            | 1             | 0           | 0.227366                | 0.077040  | -1.503235 |
| 16            | 6             | 0           | -1.512143               | -0.532908 | -0.317626 |
| 17            | 1             | 0           | -2.121886               | -0.980499 | -1.114883 |
| 18            | 6             | 0           | -1.998422               | 0.892872  | -0.249575 |
| 19            | 6             | 0           | -1.235021               | 1.937643  | 0.326710  |
| 20            | 8             | 0           | -1.485156               | 3.142455  | 0.410028  |
| 21            | 8             | 0           | -0.032431               | 1.461210  | 0.865347  |
| 22            | 6             | 0           | 0.875551                | 2.456891  | 1.289481  |
| 23            | 1             | 0           | 0.326860                | 3.267676  | 1.779846  |
| 24            | 1             | 0           | 1.527274                | 1.965766  | 2.021370  |
| 25            | 6             | 0           | 1.691051                | 2.999836  | 0.129653  |
| 26            | 1             | 0           | 1.023254                | 3.495882  | -0.580684 |
| 27            | 1             | 0           | 2.431003                | 3.730115  | 0.481469  |
| 28            | 1             | 0           | 2.221182                | 2.189422  | -0.381568 |
| 29            | 8             | 0           | 0.412089                | -1.985790 | -1.065496 |
| 30            | 6             | 0           | -1.676354               | -2.805985 | 0.902103  |
| 31            | 8             | 0           | -1.019340               | -3.436151 | 1.713702  |
| 32            | 6             | 0           | -3.348659               | 1.069624  | -0.675350 |
| 33            | 8             | 0           | -4.055480               | 0.111122  | -1.058677 |
| 34            | 6             | 0           | -2.395717               | -3.501382 | -0.233294 |
| 35            | 1             | 0           | -2.607157               | -4.538501 | 0.040143  |

|    |   |   |           |           |           |
|----|---|---|-----------|-----------|-----------|
| 36 | 1 | 0 | -3.309500 | -2.971545 | -0.521392 |
| 37 | 1 | 0 | -1.723144 | -3.496150 | -1.098580 |
| 38 | 6 | 0 | -3.981387 | 2.452360  | -0.661384 |
| 39 | 1 | 0 | -3.989516 | 2.875530  | 0.348190  |
| 40 | 1 | 0 | -3.410061 | 3.160991  | -1.268637 |
| 41 | 1 | 0 | -5.002737 | 2.356872  | -1.042121 |
| 42 | 6 | 0 | -1.840004 | -1.310344 | 0.973616  |
| 43 | 1 | 0 | -2.906997 | -1.117632 | 1.150791  |
| 44 | 1 | 0 | -1.272216 | -0.916717 | 1.822119  |

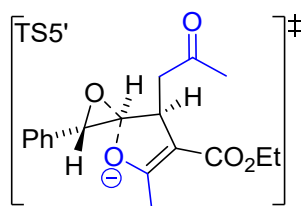

| Center Number | Atomic Number | Atomic Type | Coordinates (Angstroms) |           |           |
|---------------|---------------|-------------|-------------------------|-----------|-----------|
|               |               |             | X                       | Y         | Z         |
| 1             | 6             | 0           | 5.179561                | -1.086424 | -0.655521 |
| 2             | 6             | 0           | 3.846601                | -0.712624 | -0.790811 |
| 3             | 6             | 0           | 3.369789                | 0.434876  | -0.152027 |
| 4             | 6             | 0           | 4.240683                | 1.193640  | 0.625926  |
| 5             | 6             | 0           | 5.578112                | 0.825693  | 0.754308  |
| 6             | 6             | 0           | 6.052877                | -0.315315 | 0.112431  |
| 7             | 1             | 0           | 5.541109                | -1.987614 | -1.147055 |
| 8             | 1             | 0           | 3.152212                | -1.324153 | -1.360928 |
| 9             | 1             | 0           | 3.823278                | 2.067091  | 1.119932  |
| 10            | 1             | 0           | 6.252561                | 1.428238  | 1.360284  |
| 11            | 1             | 0           | 7.095753                | -0.608781 | 0.214433  |
| 12            | 6             | 0           | 1.933989                | 0.887246  | -0.283222 |
| 13            | 1             | 0           | 1.700163                | 1.004833  | -1.362026 |
| 14            | 6             | 0           | 0.932654                | 0.125942  | 0.456467  |
| 15            | 1             | 0           | 1.268152                | -0.198526 | 1.435049  |
| 16            | 6             | 0           | -0.565998               | 0.317872  | 0.299835  |
| 17            | 1             | 0           | -0.887035               | 0.839990  | 1.206246  |
| 18            | 6             | 0           | -1.200399               | -1.055702 | 0.250433  |
| 19            | 6             | 0           | -2.596904               | -1.261684 | 0.470596  |
| 20            | 8             | 0           | -3.254725               | -2.298563 | 0.423468  |
| 21            | 8             | 0           | -3.218623               | -0.069846 | 0.788348  |
| 22            | 6             | 0           | -4.631637               | -0.124206 | 0.914221  |
| 23            | 1             | 0           | -4.911217               | -1.030624 | 1.460661  |
| 24            | 1             | 0           | -4.893838               | 0.753316  | 1.515483  |



|    |   |   |           |           |           |
|----|---|---|-----------|-----------|-----------|
| 25 | 6 | 0 | -5.314664 | -0.076599 | -0.439247 |
| 26 | 1 | 0 | -5.071837 | -0.981258 | -1.003178 |
| 27 | 1 | 0 | -6.403714 | -0.023040 | -0.316427 |
| 28 | 1 | 0 | -4.973200 | 0.794737  | -1.005380 |
| 29 | 8 | 0 | 1.541221  | 1.916440  | 0.538336  |
| 30 | 6 | 0 | -2.138962 | 2.076877  | -0.751554 |
| 31 | 8 | 0 | -2.992483 | 2.183717  | -1.614938 |
| 32 | 6 | 0 | -0.285462 | -2.045743 | -0.086368 |
| 33 | 8 | 0 | 0.943738  | -1.718456 | -0.206888 |
| 34 | 6 | 0 | -2.190419 | 2.914255  | 0.509206  |
| 35 | 1 | 0 | -2.838288 | 3.779403  | 0.346938  |
| 36 | 1 | 0 | -2.609049 | 2.302337  | 1.315583  |
| 37 | 1 | 0 | -1.185271 | 3.224732  | 0.814771  |
| 38 | 6 | 0 | -0.625774 | -3.491272 | -0.323749 |
| 39 | 1 | 0 | -0.050101 | -4.112062 | 0.372864  |
| 40 | 1 | 0 | -1.692641 | -3.677391 | -0.201066 |
| 41 | 1 | 0 | -0.304146 | -3.765967 | -1.335374 |
| 42 | 6 | 0 | -0.924182 | 1.205017  | -0.912390 |
| 43 | 1 | 0 | -1.026294 | 0.613106  | -1.825821 |
| 44 | 1 | 0 | -0.098805 | 1.924197  | -1.022811 |

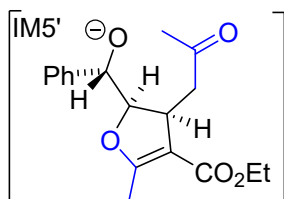

| Center Number | Atomic Number | Atomic Type | Coordinates (Angstroms) |           |           |
|---------------|---------------|-------------|-------------------------|-----------|-----------|
|               |               |             | X                       | Y         | Z         |
| 1             | 6             | 0           | -4.724504               | 1.819650  | -0.070869 |
| 2             | 6             | 0           | -3.414504               | 1.405293  | -0.295078 |
| 3             | 6             | 0           | -3.026849               | 0.089388  | -0.022377 |
| 4             | 6             | 0           | -3.978743               | -0.800680 | 0.475233  |
| 5             | 6             | 0           | -5.290042               | -0.388682 | 0.695601  |
| 6             | 6             | 0           | -5.669837               | 0.924121  | 0.425550  |
| 7             | 1             | 0           | -5.009742               | 2.847807  | -0.286183 |
| 8             | 1             | 0           | -2.679237               | 2.107294  | -0.679705 |
| 9             | 1             | 0           | -3.644817               | -1.814109 | 0.674729  |
| 10            | 1             | 0           | -6.021281               | -1.096473 | 1.081850  |
| 11            | 1             | 0           | -6.694000               | 1.248021  | 0.599410  |
| 12            | 6             | 0           | -1.610824               | -0.399284 | -0.253065 |
| 13            | 1             | 0           | -1.426340               | -0.390138 | -1.347212 |
| 14            | 6             | 0           | -0.559635               | 0.484764  | 0.422986  |

|    |   |   |           |           |           |
|----|---|---|-----------|-----------|-----------|
| 15 | 1 | 0 | -0.893884 | 0.759504  | 1.431529  |
| 16 | 6 | 0 | 0.809196  | -0.215998 | 0.457097  |
| 17 | 1 | 0 | 0.967446  | -0.673187 | 1.438343  |
| 18 | 6 | 0 | 1.727343  | 0.962844  | 0.218437  |
| 19 | 6 | 0 | 3.167222  | 0.968290  | 0.340721  |
| 20 | 8 | 0 | 3.938872  | 1.878964  | 0.069405  |
| 21 | 8 | 0 | 3.612106  | -0.215505 | 0.842765  |
| 22 | 6 | 0 | 5.023399  | -0.354821 | 0.945562  |
| 23 | 1 | 0 | 5.457121  | 0.587283  | 1.294986  |
| 24 | 1 | 0 | 5.173263  | -1.126458 | 1.706665  |
| 25 | 6 | 0 | 5.631788  | -0.767491 | -0.380271 |
| 26 | 1 | 0 | 5.490581  | 0.026791  | -1.118059 |
| 27 | 1 | 0 | 6.706561  | -0.953211 | -0.268197 |
| 28 | 1 | 0 | 5.155646  | -1.680495 | -0.751414 |
| 29 | 8 | 0 | -1.411556 | -1.656248 | 0.264893  |
| 30 | 6 | 0 | -0.188002 | -2.397873 | -0.622373 |
| 31 | 8 | 0 | -0.579224 | -2.756185 | -1.766007 |
| 32 | 6 | 0 | 0.987863  | 1.992664  | -0.265517 |
| 33 | 8 | 0 | -0.330657 | 1.754776  | -0.275023 |
| 34 | 6 | 0 | 0.117133  | -3.503202 | 0.400918  |
| 35 | 1 | 0 | -0.777926 | -4.122223 | 0.514753  |
| 36 | 1 | 0 | 0.928846  | -4.132202 | 0.013255  |
| 37 | 1 | 0 | 0.405702  | -3.113708 | 1.385671  |
| 38 | 6 | 0 | 1.392481  | 3.316185  | -0.800420 |
| 39 | 1 | 0 | 2.477551  | 3.413752  | -0.767905 |
| 40 | 1 | 0 | 1.035446  | 3.418849  | -1.832249 |
| 41 | 1 | 0 | 0.924769  | 4.117057  | -0.215334 |
| 42 | 6 | 0 | 0.913656  | -1.285413 | -0.632848 |
| 43 | 1 | 0 | 1.902057  | -1.760665 | -0.580966 |
| 44 | 1 | 0 | 0.843057  | -0.808452 | -1.617964 |

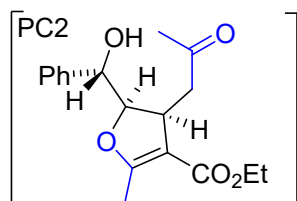

| Center Number | Atomic Number | Atomic Type | Coordinates (Angstroms) |           |           |
|---------------|---------------|-------------|-------------------------|-----------|-----------|
|               |               |             | X                       | Y         | Z         |
| 1             | 6             | 0           | -4.763257               | -1.331430 | 0.957213  |
| 2             | 6             | 0           | -3.512623               | -0.728150 | 1.031994  |
| 3             | 6             | 0           | -3.083162               | 0.135039  | 0.023426  |
| 4             | 6             | 0           | -3.923098               | 0.390595  | -1.059813 |

|    |   |   |           |           |           |
|----|---|---|-----------|-----------|-----------|
| 5  | 6 | 0 | -5.176257 | -0.210318 | -1.134017 |
| 6  | 6 | 0 | -5.598823 | -1.073540 | -0.126972 |
| 7  | 1 | 0 | -5.089044 | -2.000110 | 1.749419  |
| 8  | 1 | 0 | -2.858710 | -0.932270 | 1.876113  |
| 9  | 1 | 0 | -3.588843 | 1.076847  | -1.832134 |
| 10 | 1 | 0 | -5.825950 | -0.001171 | -1.979784 |
| 11 | 1 | 0 | -6.578272 | -1.540683 | -0.183586 |
| 12 | 6 | 0 | -1.710197 | 0.764198  | 0.089073  |
| 13 | 1 | 0 | -1.454444 | 0.959092  | 1.138709  |
| 14 | 6 | 0 | -0.634541 | -0.131374 | -0.510888 |
| 15 | 1 | 0 | -0.876031 | -0.297500 | -1.569132 |
| 16 | 6 | 0 | 0.826145  | 0.344967  | -0.389712 |
| 17 | 1 | 0 | 1.125615  | 0.861444  | -1.305328 |
| 18 | 6 | 0 | 1.510725  | -0.995118 | -0.242238 |
| 19 | 6 | 0 | 2.940969  | -1.229004 | -0.341601 |
| 20 | 8 | 0 | 3.520261  | -2.286425 | -0.175101 |
| 21 | 8 | 0 | 3.587780  | -0.082002 | -0.668260 |
| 22 | 6 | 0 | 5.013123  | -0.178225 | -0.772438 |
| 23 | 1 | 0 | 5.269592  | -1.125904 | -1.253178 |
| 24 | 1 | 0 | 5.296607  | 0.648656  | -1.428747 |
| 25 | 6 | 0 | 5.672485  | -0.062014 | 0.585393  |
| 26 | 1 | 0 | 5.385827  | -0.905192 | 1.219339  |
| 27 | 1 | 0 | 6.762331  | -0.067829 | 0.476464  |
| 28 | 1 | 0 | 5.382388  | 0.870538  | 1.080503  |
| 29 | 6 | 0 | 0.696491  | 2.680086  | 0.700081  |
| 30 | 8 | 0 | -0.075675 | 3.186330  | 1.493256  |
| 31 | 6 | 0 | 0.584349  | -1.912841 | 0.122265  |
| 32 | 8 | 0 | -0.672175 | -1.425253 | 0.128699  |
| 33 | 6 | 0 | 1.264401  | 3.462974  | -0.458834 |
| 34 | 1 | 0 | 1.222433  | 4.531794  | -0.238919 |
| 35 | 1 | 0 | 2.287686  | 3.159455  | -0.701299 |
| 36 | 1 | 0 | 0.638859  | 3.264883  | -1.337354 |
| 37 | 6 | 0 | 0.714175  | -3.331498 | 0.522195  |
| 38 | 1 | 0 | 1.763782  | -3.624136 | 0.522730  |
| 39 | 1 | 0 | 0.280526  | -3.473878 | 1.518614  |
| 40 | 1 | 0 | 0.149801  | -3.966539 | -0.169782 |
| 41 | 6 | 0 | 1.138029  | 1.239301  | 0.827663  |
| 42 | 1 | 0 | 2.229543  | 1.240987  | 0.942247  |
| 43 | 1 | 0 | 0.707630  | 0.816069  | 1.740609  |
| 44 | 8 | 0 | -1.626230 | 1.959004  | -0.668937 |
| 45 | 1 | 0 | -1.856627 | 2.690321  | -0.079498 |

---
